# Supplementary material for: Access to chiral 3-benzylchromanones and 2,6-disubstituted cyclohexanones via Rh-catalyzed chemo- and enantioselective hydrogenation of arylidene chromanones/cyclohexanones
Source: Royal Society of Chemistry journal article supplement (doi:10.1039/d4qo02376e), 2025-01-01
Supplement: d4qo02376e1.pdf [file d4qo02376e1.pdf]

*Supporting Information for:*

**An Access to Chiral 3-Benzylchromanones and 2,6-Disubstituted  
Cyclohexanones *via* Rh-Catalyzed Chemo- and Enantioselective Hydrogenation  
of Arylidene Chromanones/Cyclohexanones**

Qianling Guo,<sup>‡a</sup> Chaochao Xie,<sup>‡a</sup> Guofu Zi,<sup>a</sup> Yuping Huang,<sup>\*b</sup> and Guohua Hou<sup>\*a</sup>

[a] Key Laboratory of Radiopharmaceuticals, College of Chemistry, Beijing Normal University, Beijing 100875, China.

[b] Research Institute of Petroleum Processing, SINOPEC, Beijing 100083, China.

\*Emails: Yuping Huang: huangyuping.ripp@sinopec.com; Guohua Hou: ghhou@bnu.edu.cn

**Contents:**

|                                                                                                             |      |
|-------------------------------------------------------------------------------------------------------------|------|
| 1. Experimental Section.....                                                                                | S2   |
| 2. General procedure for the synthesis of substrates <b>1</b> , <b>3</b> , <b>5</b> and <b>6</b> .....      | S2   |
| 3. The characterization data for substrates <b>1</b> and <b>3</b> .....                                     | S6   |
| 4. General procedure for asymmetric hydrogenation of <b>1</b> and <b>3</b> .....                            | S12  |
| 5. NMR, HPLC, optical rotation and HRMS data of compounds <b>2</b> , <b>4</b> , <b>5</b> and <b>6</b> ..... | S14  |
| 6. References.....                                                                                          | S25  |
| 7. NMR, SFC and HPLC spectra.....                                                                           | S28  |
| 8. X-ray crystallographic analysis of compound <b>2a</b> .....                                              | S110 |

## 1. Experimental Section

**General Information:** All the air or moisture sensitive reactions and manipulations were performed by using standard Schlenk techniques and in a nitrogen-filled glovebox. THF, dioxane and toluene were distilled from sodium benzophenone ketyl. DCM was distilled from calcium hydride. Anhydrous MeOH was distilled from magnesium.  $^1\text{H}$  NMR and  $^{13}\text{C}$  NMR spectra were recorded on Bruker AV (400 MHz) spectrometers and JEOL JNM-ECX600P and JNM-ECS600 (400 MHz or 600 MHz) spectrometers. ( $\text{CDCl}_3$  was the solvent used for the NMR analysis, with TMS as the internal standard). Optical rotation was determined using Autopol III Automatic polarimeter (Rudolph research Analytical). HPLC analysis was conducted on Agilent 1260 series instrument. SFC analysis was conducted on Agilent 1260 series instrument. HRMS were recorded on a Waters LCT Premier XE mass spectrometer with TOF.

## 2. General procedure for the synthesis of substrates 1, 3, 5 and 6

### General Procedure for Synthesis of Products 1

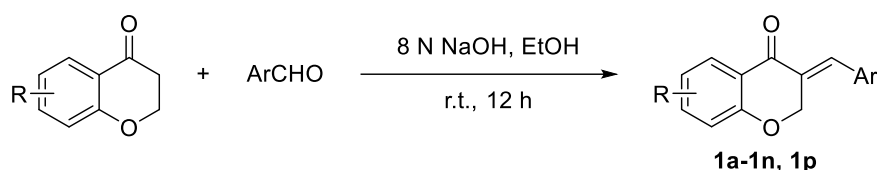

The chroman-4-one (10 mmol, 1.0 equiv.) was added to a single-necked flask, dissolved with EtOH (4 mL) and stirred, then the corresponding aldehyde (10 mmol, 1.0 equiv.) was added. The aqueous solution of NaOH (2.4 mmol, 8 N, 0.24 equiv.) was slowly added to the system and stirred at room temperature for 12 h. The solid precipitate was collected by filtration, the crude product was purified by column chromatography (PE:EA = 10:1). The corresponding products **1a-1n** and **1p** were obtained after recrystallization.<sup>1</sup>

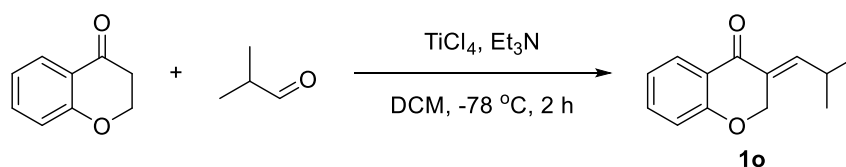

In the nitrogen atmosphere, chroman-4-one (10 mmol, 1.0 equiv.) was added to the dried three-necked bottle, and anhydrous DCM (30 mL) was added for stirring and dissolution.  $\text{TiCl}_4$  (1.3 mL, 12 mmol, 1.2 equiv.) and  $\text{Et}_3\text{N}$  (2.0 mL, 14 mmol, 1.4 equiv.) were added to the system, the mixture was stirred at  $-78\text{ }^\circ\text{C}$  for 30 minutes. Then isobutyraldehyde (12 mmol, 1.2 equiv.) was added to the

system, and stirred at  $-78\text{ }^{\circ}\text{C}$  for 2 hours. The reaction was quenched by adding water (20 mL) and then cooled to room temperature. The water layer was extracted with DCM ( $3 \times 30\text{ mL}$ ), the combined organic layers were washed with 1 M HCl aqueous solution and dried with anhydrous  $\text{Na}_2\text{SO}_4$ . The solvent was evaporated, and the crude product was purified by column chromatography to obtain product **1o**.<sup>19</sup>

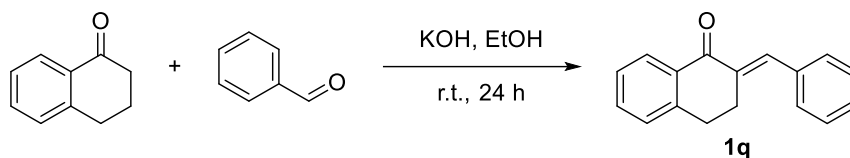

KOH (1.1 g) was added to a round-bottomed flask and mixed with EtOH (100 mL), then 1-tetralone (20 mmol, 1.0 equiv.) and benzaldehyde (50 mmol, 2.5 equiv.) were slowly added to the system in turn and stirred at room temperature for 24 h. After the reaction was complete, the solid was filtered and separated. The crude product was purified by column chromatography (PE:EA = 10:1), and the corresponding product **1q** was obtained.<sup>2</sup>

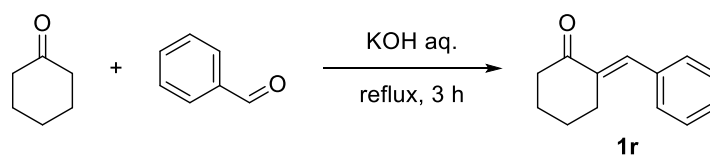

The mixture of benzaldehyde (25 mmol, 1.0 equiv.), cyclohexanone (37.5 mmol, 1.5 equiv.) and 1N KOH solution (25 mL) was refluxed for 3 h. After cooling to room temperature, EA (50 mL) was added, the water layer was separated and extracted with EA ( $3 \times 30\text{ mL}$ ). The combined organic phases were washed with brine and dried with  $\text{Na}_2\text{SO}_4$ . The solvent was evaporated and the crude product was purified by silica gel column chromatography (PE:EA = 10:1) to obtain the substrate **1r**.<sup>2</sup>

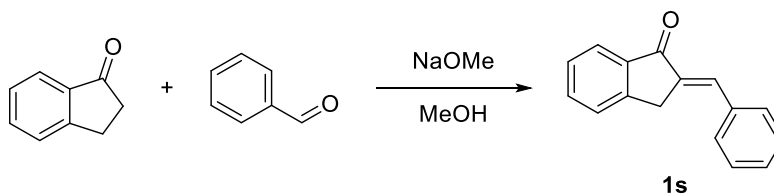

Under nitrogen atmosphere, the solution of NaOMe was added to the mixed solution of benzaldehyde (12 mmol, 1.1 equiv.) and MeOH (30 mL). 1-indanone (11.4 mmol, 1.0 equiv.) was dissolved in MeOH (30 mL), dropped into the mixture, and stirred at room temperature for 15 h. The reaction mixture was poured into water (50 mL), acidified with 2N HCl and extracted with DCM ( $3 \times 30\text{ mL}$ ). The combined organic layers were washed with brine, then dried with  $\text{Na}_2\text{SO}_4$ ,

and the solvent was removed. The substrate **1s** was obtained by column chromatography (PE:EA = 10:1).<sup>3</sup>

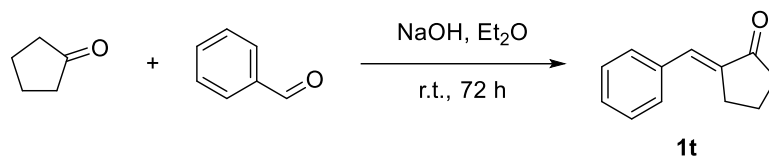

Benzaldehyde (50 mmol, 1.0 equiv.), cyclopentanone (60 mmol, 1.2 equiv.), diethyl ether (50 mL) and 1N NaOH solution (50 mL) were sequentially added into a 250 mL single-necked flask, and the mixture was stirred at room temperature for 72 h. The reaction solution was extracted with EA (3 × 30 mL), the combined organic phases were washed with brine, dried with Na<sub>2</sub>SO<sub>4</sub> and the solvent was evaporated. The crude product was purified by silica gel column chromatography to obtain substrate **1t**.<sup>2</sup>

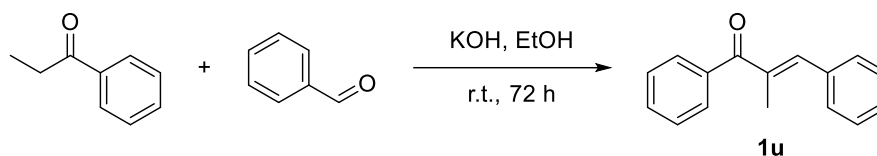

In a 250 mL flask, an aqueous solution of KOH (0.1 mol, 2.5 equiv.) was added to the EtOH (80 mL) solution of phenylacetone (40 mmol, 1.0 equiv.) and benzaldehyde (80 mmol, 2.0 equiv.) and stirred at room temperature for 72 h. EtOH was removed under reduced pressure and extracted with EA (3 × 30 mL). The combined organic layers were washed with aqueous HCl solution and brine, dried with Na<sub>2</sub>SO<sub>4</sub>, and the solvent was evaporated. The residue was purified by column chromatography (PE:EA = 20:1) to obtain the substrate **1u**.<sup>2</sup>

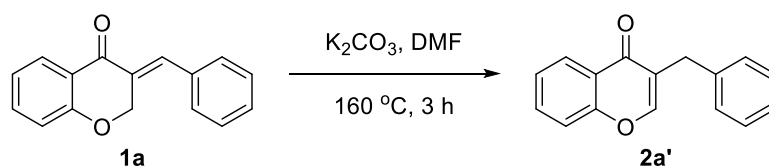

The mixture of **1a** (3.0 mmol, 1.0 equiv.), K<sub>2</sub>CO<sub>3</sub> (5.1 mmol, 1.7 equiv.) and DMF (36 mL) was refluxed for 3 h, then poured into brine and extracted with EA (3 × 50 mL). The solvent was removed under reduced pressure, and the residue after drying was separated by column chromatography with (PE:EA = 15:1) to obtain the product **2a'**.<sup>1</sup>

### General Procedure for Synthesis of Products 3

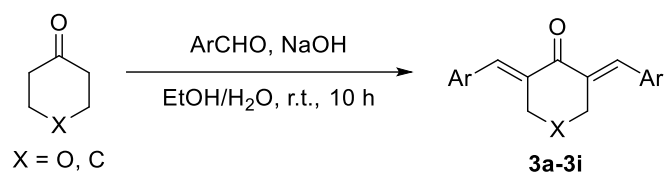

The corresponding mixed solution (10 mL) of aldehyde (15 mmol, 2.0 equiv.), tetrahydro-4*H*-pyran-4-one/cyclohexanone (7.5 mmol, 1.0 equiv.) and EtOH were slowly added to the EtOH/H<sub>2</sub>O (v/v = 1/1, 28.5 mL) solution of NaOH (30 mmol, 4.0 equiv.). The reaction mixture was stirred at room temperature for 10 h, the yellow precipitate was filtered and recrystallized from DCM/PE, and dried in vacuum.<sup>4</sup>

### General Procedure for Synthesis of Products 5 and 6

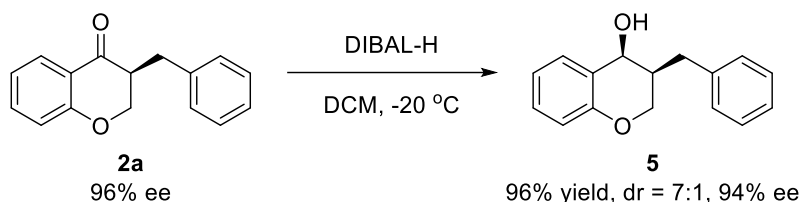

The chiral substrate **2a** was added to a dry three-neck flask equipped with a magnetic stirrer, nitrogen was replaced three times, dried DCM was added and cooled to -20 °C. Subsequently, a newly prepared solution of 1 M DIBAL-H (diisobutylaluminum hydride) in toluene (1.2 equiv.) was added. The reaction was stirred at -20 °C and the completion of the reaction was observed by TLC analysis. Subsequently, the reaction was cooled to 0 °C, and water was added to quench the reaction. The aqueous layer was extracted with DCM (2 × 20 mL). The combined organic layers were dried with Na<sub>2</sub>SO<sub>4</sub> and concentrated. The crude product was purified by column chromatography, and product **5** was obtained in 96% yield.

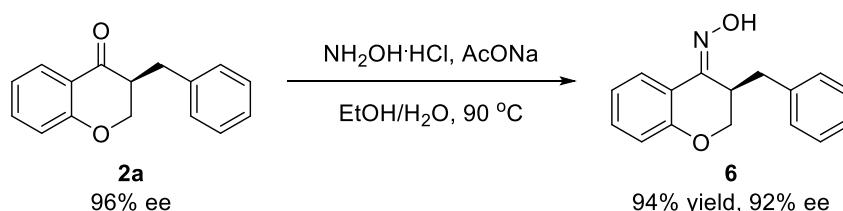

Sodium acetate (1.5 equiv.) was added to a stirred **2a** (1.0 equiv.) EtOH/H<sub>2</sub>O solution (v/v = 1/3, 15 mL). Hydroxylamine hydrochloride (1.5 equiv.) was added, then heated to 90 °C by oil bath. and stirred for 16 h. The mixture was cooled to room temperature, diluted with EA and washed with water. The organic layer was separated, dried with Na<sub>2</sub>SO<sub>4</sub>, and separated by column

chromatography after vacuum concentration to obtain product **6** in 94% yield.

### 3. The characterization data for substrates **1** and **3**

#### (*E*)-3-Benzylidenechroman-4-one (**1a**)

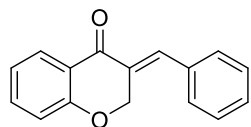

Purification by column chromatography (silica gel, PE:EA = 10:1) and recrystallization afforded the product as white solid; 3.1 g, yield: 80%; <sup>1</sup>H NMR (600 MHz, Chloroform-*d*) δ 8.03 (dd, *J* = 7.9, 1.8 Hz, 1H), 7.88 (d, *J* = 2.0 Hz, 1H), 7.51 – 7.40 (m, 4H), 7.32 (dd, *J* = 7.2, 1.9 Hz, 2H), 7.09 – 7.07 (m, 1H), 6.97 (dd, *J* = 8.3, 1.0 Hz, 1H), 5.36 (d, *J* = 1.9 Hz, 2H). The analytical data are consistent with the literature.<sup>1b</sup>

#### (*E*)-3-(3-Methylbenzylidene)chroman-4-one (**1b**)

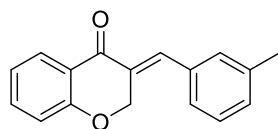

Purification by column chromatography (silica gel, PE:EA = 10:1) and recrystallization afforded the product as white solid; 645 mg, yield: 82%; <sup>1</sup>H NMR (600 MHz, Chloroform-*d*) δ 8.03 (dd, *J* = 7.9, 1.8 Hz, 1H), 7.86 (d, *J* = 2.0 Hz, 1H), 7.51 – 7.48 (m, 1H), 7.34 (t, *J* = 7.6 Hz, 1H), 7.23 (d, *J* = 7.6 Hz, 1H), 7.13 – 7.10 (m, 2H), 7.09 – 7.06 (m, 1H), 6.97 (dd, *J* = 8.4, 1.0 Hz, 1H), 5.36 (d, *J* = 1.9 Hz, 2H), 2.41 (s, 3H). The analytical data are consistent with the literature.<sup>5</sup>

#### (*E*)-3-(3-Methoxybenzylidene)chroman-4-one (**1c**)

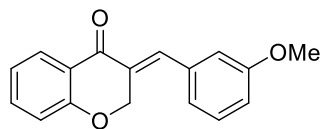

Purification by column chromatography (silica gel, PE:EA = 10:1) and recrystallization afforded the product as white solid; 450 mg, yield: 73%; <sup>1</sup>H NMR (600 MHz, Chloroform-*d*) δ 8.02 (dd, *J* = 7.8, 1.8 Hz, 1H), 7.84 (d, *J* = 2.0 Hz, 1H), 7.50 – 7.47 (m, 1H), 7.36 (t, *J* = 7.9 Hz, 1H), 7.09 – 7.06 (m, 1H), 6.97 – 6.95 (m, 2H), 6.89 (d, *J* = 6.7 Hz, 1H), 6.84 (t, *J* = 2.1 Hz, 1H), 5.35 (d, *J* = 1.9 Hz, 2H), 3.84 (s, 3H). The analytical data are consistent with the literature.<sup>1a</sup>

#### (*E*)-3-(3-Fluorobenzylidene)chroman-4-one (**1d**)

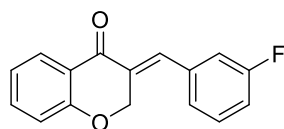

Purification by column chromatography (silica gel, PE:EA = 10:1) and recrystallization afforded the product as white solid; 240 mg, yield: 62%; <sup>1</sup>H NMR (600 MHz, Chloroform-*d*) δ 8.04 – 8.02 (m, 1H), 7.81 (s, 1H), 7.53 – 7.49 (m, 1H), 7.45 – 7.41 (m, 1H), 7.27 – 7.26 (m, 1H), 7.14 – 7.07 (m, 3H), 7.02 – 6.97 (m, 2H), 5.33 – 5.32 (m, 2H). The analytical data are consistent with the literature.<sup>6</sup>

#### (*E*)-3-(4-Methylbenzylidene)chroman-4-one (**1e**)

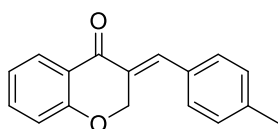

Purification by column chromatography (silica gel, PE:EA = 10:1) and recrystallization afforded the product as white solid; 890 mg, yield: 79%;

$^1\text{H NMR}$  (600 MHz, Chloroform-*d*)  $\delta$  8.02 (d,  $J = 8.0$  Hz, 1H), 7.85 (s, 1H), 7.48 (d,  $J = 7.6$  Hz, 1H), 7.25 – 7.20 (m, 4H), 7.06 (t,  $J = 7.6$  Hz, 1H), 6.95 (d,  $J = 8.3$  Hz, 1H), 5.35 (s, 2H), 2.39 (s, 3H). The analytical data are consistent with the literature.<sup>1b</sup>

**(E)-3-(4-Methoxybenzylidene)chroman-4-one (1f)**

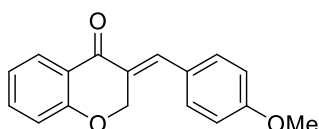

Purification by column chromatography (silica gel, PE:EA = 10:1) and recrystallization afforded the product as white solid; 710 mg, yield: 75%;  $^1\text{H NMR}$  (600 MHz, Chloroform-*d*)  $\delta$  8.02 (dd,  $J = 7.8$ ,

1.8 Hz, 1H), 7.84 (d,  $J = 1.9$  Hz, 1H), 7.49 – 7.46 (m, 1H), 7.29 – 7.27 (m, 2H), 7.08 – 7.05 (m, 1H), 6.98 – 6.95 (m, 3H), 5.38 (d,  $J = 1.9$  Hz, 2H), 3.86 (s, 3H). The analytical data are consistent with the literature.<sup>1b</sup>

**(E)-3-(4-Chlorobenzylidene)chroman-4-one (1g)**

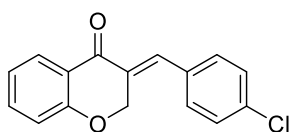

Purification by column chromatography (silica gel, PE:EA = 10:1) and recrystallization afforded the product as white solid; 120 mg, yield: 56%;  $^1\text{H NMR}$  (400 MHz, Chloroform-*d*)  $\delta$  8.02 (dd,  $J = 7.9$ , 1.7 Hz,

1H), 7.82 – 7.81 (m, 1H), 7.52 – 7.48 (m, 1H), 7.45 – 7.41 (m, 2H), 7.25 (d,  $J = 8.6$  Hz, 3H), 7.10 – 7.06 (m, 1H), 6.98 (dd,  $J = 8.4$ , 1.0 Hz, 1H), 5.31 (d,  $J = 1.9$  Hz, 2H). The analytical data are consistent with the literature.<sup>1b</sup>

**(E)-3-(2-Methylbenzylidene)chroman-4-one (1h)**

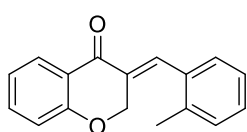

Purification by column chromatography (silica gel, PE:EA = 10:1) and recrystallization afforded the product as white solid; 410 mg, yield: 78%;

$^1\text{H NMR}$  (600 MHz, Chloroform-*d*)  $\delta$  8.05 (dd,  $J = 7.9$ , 1.8 Hz, 1H), 7.97 (d,  $J = 1.8$  Hz, 1H), 7.51 – 7.48 (m, 1H), 7.33 – 7.30 (m, 1H), 7.28 – 7.23 (m, 2H), 7.09 – 7.07 (m, 1H), 7.01 (d,  $J = 7.5$  Hz, 1H), 6.97 (dd,  $J = 8.4$ , 1.1 Hz, 1H), 5.21 (d,  $J = 1.8$  Hz, 2H), 2.36 (s, 3H).

The analytical data are consistent with the literature.<sup>5</sup>

**(E)-3-(2-Methoxybenzylidene)chroman-4-one (1i)**

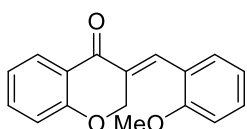

Purification by column chromatography (silica gel, PE:EA = 10:1) and recrystallization afforded the product as white solid; 805 mg, yield: 70%;

$^1\text{H NMR}$  (600 MHz, Chloroform-*d*)  $\delta$  8.04 (dd,  $J = 7.9$ , 1.8 Hz, 1H), 8.01

(d,  $J = 1.9$  Hz, 1H), 7.49 – 7.46 (m, 1H), 7.41 – 7.38 (m, 1H), 7.08 – 7.05 (m, 2H), 7.01 – 6.99 (m, 1H), 6.95 (d,  $J = 8.3$  Hz, 2H), 5.22 (d,  $J = 1.8$  Hz, 2H), 3.86 (s, 3H). The analytical data are consistent with the literature.<sup>1b</sup>

**(E)-3-(2-Bromobenzylidene)chroman-4-one (1j)**

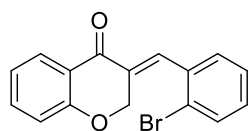

Purification by column chromatography (silica gel, PE:EA = 10:1) and recrystallization afforded the product as white solid; 150 mg, yield: 60%;

<sup>1</sup>H NMR (600 MHz, Chloroform-*d*)  $\delta$  8.06 – 8.04 (m, 1H), 7.90 (s, 1H), 7.68 – 7.67 (m, 1H), 7.51 – 7.48 (m, 1H), 7.39 – 7.36 (m, 1H), 7.28 – 7.25 (m, 1H), 7.13 – 7.07 (m, 2H), 6.98 – 6.96 (m, 1H), 5.16 (t,  $J = 1.8$  Hz, 2H). The analytical data are consistent with the literature.<sup>5</sup>

**(E)-3-(2-Fluorobenzylidene)chroman-4-one (1k)**

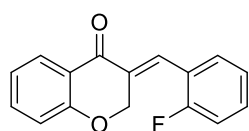

Purification by column chromatography (silica gel, PE:EA = 10:1) and recrystallization afforded the product as white solid; 300 mg, yield: 62%;

<sup>1</sup>H NMR (600 MHz, Chloroform-*d*)  $\delta$  8.04 (dd,  $J = 7.9, 1.8$  Hz, 1H), 7.85 (q,  $J = 1.6$  Hz, 1H), 7.51 – 7.48 (m, 1H), 7.43 – 7.39 (m, 1H), 7.22 – 7.20 (m, 2H), 7.18 – 7.14 (m, 1H), 7.09 – 7.07 (m, 1H), 6.97 (dd,  $J = 8.4, 1.1$  Hz, 1H), 5.19 (t,  $J = 1.7$  Hz, 2H). The analytical data are consistent with the literature.<sup>7</sup>

**(E)-3-(Furan-2-ylmethylene)chroman-4-one (1l)**

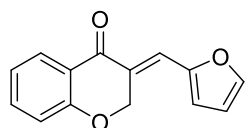

Purification by column chromatography (silica gel, PE:EA = 10:1) and recrystallization afforded the product as yellow solid; 680 mg, yield: 86%;

<sup>1</sup>H NMR (600 MHz, Chloroform-*d*)  $\delta$  8.00 (dd,  $J = 7.9, 1.8$  Hz, 1H), 7.62 (d,  $J = 1.8$  Hz, 1H), 7.52 (t,  $J = 1.9$  Hz, 1H), 7.50 – 7.47 (m, 1H), 7.07 – 7.04 (m, 1H), 6.99 (dd,  $J = 8.3, 1.0$  Hz, 1H), 6.75 (d,  $J = 3.5$  Hz, 1H), 6.55 (dd,  $J = 3.5, 1.8$  Hz, 1H), 5.60 (d,  $J = 1.9$  Hz, 2H). The analytical data are consistent with the literature.<sup>1b</sup>

**(E)-3-(Naphthalen-2-ylmethylene)chroman-4-one (1m)**

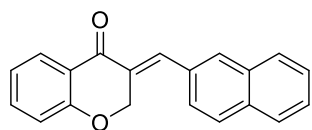

Purification by column chromatography (silica gel, PE:EA = 10:1) and recrystallization afforded the product as pale yellow solid; 980 mg, yield: 88%; <sup>1</sup>H NMR (600 MHz, Chloroform-*d*)  $\delta$  8.06 (dd,  $J =$

7.9, 1.8 Hz, 1H), 8.03 (d,  $J = 2.1$  Hz, 1H), 7.91 – 7.87 (m, 3H), 7.76 (s, 1H), 7.58 – 7.54 (m, 2H), 7.52 – 7.49 (m, 1H), 7.44 (dd,  $J = 8.4, 1.8$  Hz, 1H), 7.11 – 7.08 (m, 1H), 6.99 (dd,  $J = 8.3, 1.1$  Hz,



1H), 5.46 (d,  $J = 1.9$  Hz, 2H). The analytical data are consistent with the literature.<sup>1b</sup>

**(E)-3-(Naphthalen-1-ylmethylene)chroman-4-one (1n)**

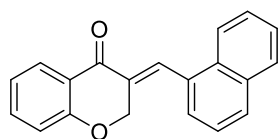

Purification by column chromatography (silica gel, PE:EA = 10:1) and recrystallization afforded the product as pale yellow solid; 500 mg, yield: 80%; <sup>1</sup>H NMR (600 MHz, Chloroform-*d*)  $\delta$  8.44 (s, 1H), 8.10 (dd,  $J =$

7.9, 1.8 Hz, 1H), 8.01 – 7.98 (m, 1H), 7.93 – 7.90 (m, 2H), 7.58 – 7.54 (m, 2H), 7.53 – 7.49 (m, 2H), 7.25 – 7.23 (m, 1H), 7.12 – 7.09 (m, 1H), 6.97 (dd,  $J = 8.3, 1.0$  Hz, 1H), 5.23 (d,  $J = 1.8$  Hz, 2H). The analytical data are consistent with the literature.<sup>5</sup>

**(E)-3-(2-methylpropylidene)chroman-4-one (1o)**

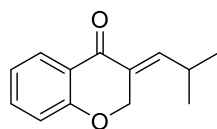

Purification by column chromatography (silica gel, PE:EA = 20:1) afforded the product as pale yellow oil; 254 mg, yield: 65%; <sup>1</sup>H NMR (400 MHz, Chloroform-*d*)  $\delta$  7.94 (dd,  $J = 7.9, 1.8$  Hz, 1H), 7.43 – 7.39 (m, 1H), 7.09 –

6.97 (m, 1H), 6.91 (d,  $J = 8.4$  Hz, 1H), 6.72 (dt,  $J = 10.2, 1.7$  Hz, 1H), 5.00 (d,  $J = 1.8$  Hz, 2H), 2.69 – 2.57 (m, 1H), 1.06 (d,  $J = 6.6$  Hz, 6H). The analytical data are consistent with the literature.<sup>20</sup>

**(E)-3-Benzylidene-6-methylchroman-4-one (1p)**

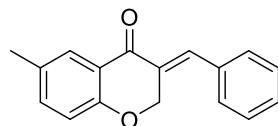

Purification by column chromatography (silica gel, PE:EA = 10:1) and recrystallization afforded the product as pale yellow solid; 202 mg, yield: 45%; <sup>1</sup>H NMR (600 MHz, Chloroform-*d*)  $\delta$  7.88 – 7.87 (m, 1H), 7.82

(dd,  $J = 2.3, 1.0$  Hz, 1H), 7.46 – 7.43 (m, 2H), 7.42 – 7.39 (m, 1H), 7.32 – 7.29 (m, 3H), 6.87 (d,  $J = 8.4$  Hz, 1H), 5.32 (d,  $J = 1.9$  Hz, 2H), 2.34 (s, 3H). The analytical data are consistent with the literature.<sup>1b</sup>

**(E)-2-Benzylidene-3,4-dihydronaphthalen-1(2H)-one (1q)**

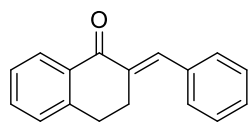

Purification by column chromatography (silica gel, PE:EA = 10:1) and recrystallization afforded the product as white solid; 1.3 g, yield: 89%; <sup>1</sup>H NMR (600 MHz, Chloroform-*d*)  $\delta$  8.14 (dd,  $J = 7.8, 1.4$  Hz, 1H), 7.88 (d,

$J = 1.9$  Hz, 1H), 7.51 – 7.48 (m, 1H), 7.46 – 7.42 (m, 4H), 7.39 – 7.34 (m, 2H), 7.26 (d,  $J = 5.5$  Hz, 2H), 3.15 – 3.13 (m, 2H), 2.97 – 2.94 (m, 2H). The analytical data are consistent with the literature.<sup>2</sup>

**(E)-2-Benzylidenecyclohexan-1-one (1r)**

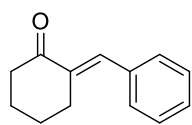

Purification by column chromatography (silica gel, PE:EA = 10:1) and recrystallization afforded the product as white solid; 3.3 g, yield: 92%; <sup>1</sup>H NMR (600 MHz, Chloroform-*d*) δ 7.49 (t, *J* = 2.3 Hz, 1H), 7.40 – 7.35 (m, 4H), 7.32 – 7.29 (m, 1H), 2.84 – 2.81 (m, 2H), 2.52 (t, *J* = 6.7 Hz, 2H), 1.95 – 1.89 (m, 2H), 1.77 – 1.73 (m, 2H). The analytical data are consistent with the literature.<sup>2</sup>

**(E)-2-Benzylidene-2,3-dihydro-1H-inden-1-one (1s)**

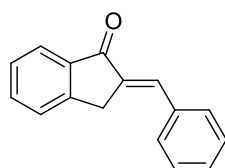

Purification by column chromatography (silica gel, PE:EA = 10:1) and recrystallization afforded the product as pale yellow solid; 1.1 g, yield: 85%; <sup>1</sup>H NMR (600 MHz, Chloroform-*d*) δ 7.92 (dd, *J* = 7.9, 3.3 Hz, 1H), 7.69 – 7.68 (m, 3H), 7.63 – 7.61 (m, 1H), 7.57 – 7.55 (m, 1H), 7.48 – 7.39 (m, 4H), 4.06 (s, 2H). The analytical data are consistent with the literature.<sup>3</sup>

**(E)-2-Benzylidenecyclopentan-1-one (1t)**

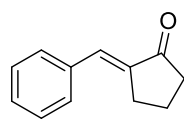

Purification by column chromatography (silica gel, PE:EA = 10:1) and recrystallization afforded the product as pale yellow solid; 1.5 g, yield: 88%; <sup>1</sup>H NMR (400 MHz, Chloroform-*d*) δ 7.55 – 7.52 (m, 2H), 7.44 – 7.34 (m, 4H), 3.00 – 2.96 (m, 2H), 2.41 (t, *J* = 7.9 Hz, 2H), 2.03 (p, *J* = 7.6 Hz, 2H). The analytical data are consistent with the literature.<sup>2</sup>

**(E)-2-Methyl-1,3-diphenylprop-2-en-1-one (1u)**

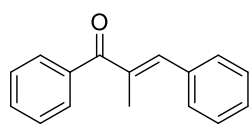

Purification by column chromatography (silica gel, PE:EA = 10:1) and recrystallization afforded the product as light yellow oil; 1.3 g, yield: 67%; <sup>1</sup>H NMR (400 MHz, Chloroform-*d*) δ 7.77 (d, *J* = 7.2 Hz, 2H), 7.57 – 7.33 (m, 8H), 7.20 (s, 1H), 2.29 (s, 3H). The analytical data are consistent with the literature.<sup>2</sup>

**3-Benzyl-4H-chromen-4-one (2a')**

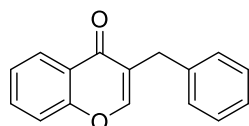

Purification by column chromatography (silica gel, PE:EA = 10:1) and recrystallization afforded the product as white solid; 460 mg, yield: 93%; <sup>1</sup>H NMR (600 MHz, Chloroform-*d*) δ 8.24 (dd, *J* = 8.0, 1.7 Hz, 1H), 7.65 – 7.63 (m, 1H), 7.61 (t, *J* = 1.1 Hz, 1H), 7.42 – 7.37 (m, 2H), 7.33 – 7.30 (m, 4H), 7.24 – 7.21 (m, 1H), 3.83 (d, *J* = 1.1 Hz, 2H). The analytical data are consistent with the literature.<sup>1b</sup>

3,5-di(*E*)-benzylidene)tetrahydro-4*H*-pyran-4-one (**3a**)

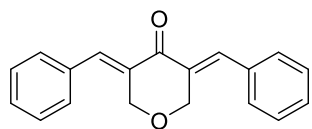

Purification by column chromatography (silica gel, PE:EA = 10:1)

and recrystallization afforded the product as yellow solid; 440 mg,

yield: 65%; <sup>1</sup>H NMR (600 MHz, Chloroform-*d*) δ 7.85 (s, 2H), 7.49

– 7.37 (m, 6H), 7.33 (d, *J* = 7.8 Hz, 4H), 4.94 (s, 4H). The analytical data are consistent with the

literature.<sup>4a</sup>

3,5-bis(*E*)-4-methylbenzylidene)tetrahydro-4*H*-pyran-4-one (**3b**)

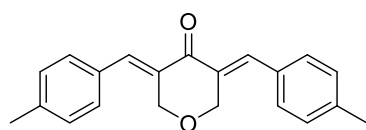

Purification by column chromatography (silica gel, PE:EA =

10:1) and recrystallization afforded the product as yellow solid;

510 mg, yield: 68%; <sup>1</sup>H NMR (600 MHz, Chloroform-*d*) δ 7.82

(s, 2H), 7.23 (s, 8H), 4.93 (d, *J* = 1.9 Hz, 4H), 2.39 (s, 6H). The analytical data are consistent with

the literature.<sup>4a</sup>

2,6-Di(*E*)-benzylidene)cyclohexan-1-one (**3c**)

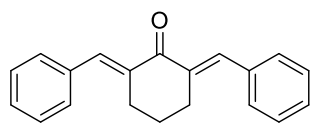

Purification by column chromatography (silica gel, PE:EA = 10:1)

and recrystallization afforded the product as yellow solid; 2.0 g, yield:

89%; <sup>1</sup>H NMR (600 MHz, Chloroform-*d*) δ 7.81 (s, 2H), 7.47 (d, *J* =

7.6 Hz, 4H), 7.42 (d, *J* = 6.8 Hz, 4H), 7.36 – 7.33 (m, 2H), 2.94 (t, *J* = 6.5 Hz, 4H), 1.82 – 1.78 (m,

2H). The analytical data are consistent with the literature.<sup>4b</sup>

2,6-Bis(*E*)-3-methylbenzylidene)cyclohexan-1-one (**3d**)

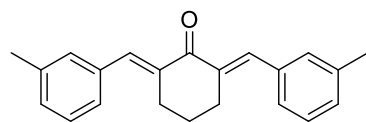

Purification by column chromatography (silica gel, PE:EA =

10:1) and recrystallization afforded the product as yellow solid;

1.9 g, yield: 91%; <sup>1</sup>H NMR (600 MHz, Chloroform-*d*) δ 7.78 (d,

*J* = 2.1 Hz, 2H), 7.32 – 7.27 (m, 6H), 7.17 – 7.15 (m, 2H), 2.94 – 2.92 (m, 4H), 2.39 (s, 6H), 1.81 –

1.77 (m, 2H). The analytical data are consistent with the literature.<sup>4b</sup>

2,6-Bis(*E*)-3-fluorobenzylidene)cyclohexan-1-one (**3e**)

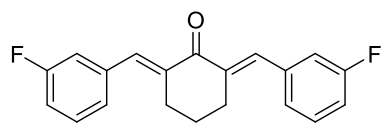

Purification by column chromatography (silica gel, PE:EA =

10:1) and recrystallization afforded the product as yellow solid;

1.8 g, yield: 90%; <sup>1</sup>H NMR (600 MHz, Chloroform-*d*) δ 7.73

(d, *J* = 2.2 Hz, 2H), 7.39 – 7.35 (m, 2H), 7.23 (d, *J* = 7.0 Hz, 2H), 7.17 – 7.14 (m, 2H), 7.06 – 7.03

(m, 2H), 2.93 – 2.90 (m, 4H), 1.83 – 1.79 (m, 2H). The analytical data are consistent with the

literature.<sup>8</sup>

#### 2,6-Bis(*E*)-4-methylbenzylidene)cyclohexan-1-one (**3f**)

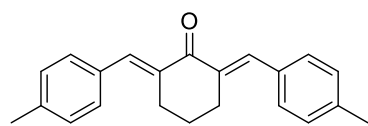

Purification by column chromatography (silica gel, PE:EA = 10:1) and recrystallization afforded the product as yellow solid; 2.2 g, yield: 94%; <sup>1</sup>H NMR (600 MHz, Chloroform-*d*) δ 7.78 (s,

2H), 7.39 – 7.38 (m, 4H), 7.22 (t, *J* = 5.7 Hz, 4H), 2.93 (q, *J* = 5.4 Hz, 4H), 2.39 (d, *J* = 4.0 Hz, 6H), 1.79 (p, *J* = 5.1 Hz, 2H). The analytical data are consistent with the literature.<sup>4b</sup>

#### 2,6-Bis(*E*)-2-fluorobenzylidene)cyclohexan-1-one (**3g**)

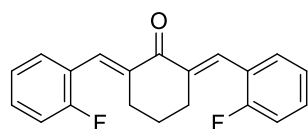

Purification by column chromatography (silica gel, PE:EA = 10:1) and recrystallization afforded the product as yellow solid; 1.5 g, yield: 86%; <sup>1</sup>H NMR (600 MHz, Chloroform-*d*) δ 7.83 (s, 2H), 7.43 – 7.28

(m, 4H), 7.17 (d, *J* = 6.7 Hz, 2H), 7.10 (d, *J* = 9.4 Hz, 2H), 2.81 (d, *J* = 6.1 Hz, 5H), 1.77 (q, *J* = 5.8 Hz, 2H). The analytical data are consistent with the literature.<sup>9</sup>

#### 2,6-Bis(*E*)-3,4-dichlorobenzylidene)cyclohexan-1-one (**3h**)

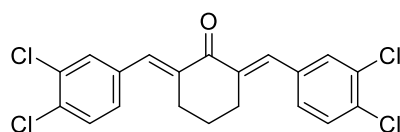

Purification by column chromatography (silica gel, PE:EA = 10:1) and recrystallization afforded the product as yellow solid; 2.3 g, yield: 84%; <sup>1</sup>H NMR (600 MHz, Chloroform-*d*)

δ 7.64 (d, *J* = 2.4 Hz, 2H), 7.52 (d, *J* = 2.1 Hz, 2H), 7.48 – 7.44 (m, 2H), 7.26 (dd, *J* = 8.2, 2.1 Hz, 2H), 2.88 – 2.86 (m, 4H), 1.83 – 1.79 (m, 2H). The analytical data are consistent with the literature.<sup>10</sup>

#### (2*E*,6*E*)-2,6-Bis(furan-2-ylmethylene)cyclohexan-1-one (**3i**)

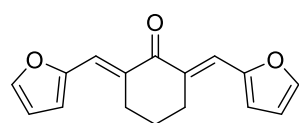

Purification by column chromatography (silica gel, PE:EA = 10:1) and recrystallization afforded the product as yellow solid; 413 mg, yield: 60%; <sup>1</sup>H NMR (600 MHz, Chloroform-*d*) δ 7.56 (d, *J* = 5.3 Hz, 4H),

6.66 (d, *J* = 4.4 Hz, 2H), 6.52 (s, 2H), 3.01 (d, *J* = 6.7 Hz, 4H), 1.89 (q, *J* = 6.1 Hz, 2H). The analytical data are consistent with the literature.<sup>8</sup>

### 4. General procedure for asymmetric hydrogenation of **1** and **3**

**General procedure:** In a nitrogen-filled glove box, [Rh(COD)Cl]<sub>2</sub> (0.5 mol%) and (*S,S*)-f-spiroPhos (1.0 mol%) were mixed in MeOH at room temperature for 40 minutes to prepare a stock solution. Aliquots of catalyst solution (1.0 mL, 0.00125 mmol) were transferred to vials containing different substrates **1** or **3** (0.125 mmol) by syringe. Subsequently, the reaction vial was transferred

to an autoclave filled with hydrogen gas and the mixture was stirred at room temperature under H<sub>2</sub> (10 atm) for 2 h. After that, the hydrogen gas was released slowly and carefully and the reaction mixture was passed through a silica gel short column to remove the metal complex. (**4a** and **4b**: DCM was added for dissolution, and three equivalents of PCC and appropriate amount of diatomite were added. The reaction proceeded at room temperature for 4 h. After filtration, column chromatography was used for purification). The conversion was determined by <sup>1</sup>H NMR analysis. The crude products were concentrated and purified by silica gel column chromatography, and the ee values were determined by HPLC analysis on chiral stationary phase.

**Gram scale experiment:** In a nitrogen-filled glove box, [Rh(COD)Cl]<sub>2</sub> (0.025 mol%) and (*S,S*)-f-spiroPhos (0.05 mol%) were mixed in MeOH at room temperature and stirred for 40 minutes to prepare a stock solution. The catalyst solution (0.00215 mmol) was transferred by syringe into a vial containing substrate **1a** (4.3 mmol). Subsequently, the reaction vial was transferred to an autoclave filled with hydrogen gas and the reaction was carried out at room temperature and H<sub>2</sub> (10 atm) for 72 h. After the reaction, the hydrogen gas was released slowly and carefully. The reaction mixture was passed through a silica gel short column to remove the metal complex and the ee value was determined by HPLC analysis on chiral stationary phase. Purification by flash column chromatography (silica gel, PE:EA = 10:1) afforded the product **2a** as white solid; 0.99 g, yield: 97%; 90% ee; HPLC (Lux 5u Cellulose-1, *i*-propanol/*n*-hexane = 5/95, flow rate = 1.0 mL/min, *l* = 210 nm) *t*<sub>R</sub> = 7.0 min (minor), 7.6 min (major).

**Deuteration experiment:** In a nitrogen-filled glove box, [Rh(COD)Cl]<sub>2</sub> (0.5 mol%) and (*S,S*)-f-spiroPhos (1.0 mol%) were mixed in MeOH for 40 minutes at room temperature to prepare a stock solution. An aliquot of the catalyst solution (1.0 mL, 0.00125 mmol) was transferred to a vial containing the substrate **1a** (0.125 mmol) by syringe. The reaction vial was then transferred to an autoclave filled with D<sub>2</sub>. Then the mixture was stirred at room temperature under D<sub>2</sub> (10 atm) for 4.5 h. After that, the D<sub>2</sub> gas was released slowly and carefully. The solution was subjected to silica gel column chromatography to remove metal complexes and purified. The product **2a-D** was analyzed by <sup>1</sup>H NMR. **2a-D**: <sup>1</sup>H NMR (400 MHz, Chloroform-*d*) δ 7.93 (dd, *J* = 7.9, 1.8 Hz, 1H), 7.49 – 7.45 (m, 1H), 7.35 – 7.30 (m, 2H), 7.26 – 7.22 (m, 3H), 7.05 – 7.01 (m, 1H), 6.96 (dd, *J* = 8.4, 1.0 Hz, 1H), 4.36 (d, *J* = 11.5 Hz, 1H), 4.17 (d, *J* = 11.6 Hz, 1H), 2.69 (s, 1H).

## 5. NMR, HPLC, optical rotation and HRMS data of compounds 2, 4, 5 and 6

### (*S*)-3-Benzylchroman-4-one (**2a**)

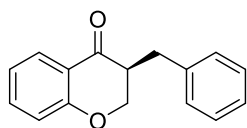

Purification by flash column chromatography (silica gel, PE:EA = 10:1) afforded the product as white solid; 29.1 mg, yield: 98%; 96% ee;  $[\alpha]_{\text{D}}^{25} = +49.9$  ( $c = 1.0$ ,  $\text{CH}_2\text{Cl}_2$ ); HPLC (Lux 5u Cellulose-1, *i*-propanol/*n*-hexane = 5/95, flow rate = 1.0 mL/min,  $l = 210$  nm)  $t_{\text{R}} = 6.9$  min (minor), 7.6 min (major);  $^1\text{H}$  NMR (600 MHz, Chloroform-*d*)  $\delta$  7.94 (dd,  $J = 7.9$ , 1.8 Hz, 1H), 7.50 – 7.47 (m, 1H), 7.35 – 7.32 (m, 2H), 7.26 – 7.24 (m, 3H), 7.05 – 7.03 (m, 1H), 6.97 (dd,  $J = 8.4$ , 1.0 Hz, 1H), 4.38 (dd,  $J = 11.5$ , 4.3 Hz, 1H), 4.18 (dd,  $J = 11.5$ , 8.4 Hz, 1H), 3.30 (dd,  $J = 14.0$ , 4.5 Hz, 1H), 2.96 – 2.91 (m, 1H), 2.72 (dd,  $J = 14.0$ , 10.4 Hz, 1H).  $^{13}\text{C}$  NMR (151 MHz, Chloroform-*d*)  $\delta$  193.9, 161.7, 138.4, 136.0, 129.2, 128.8, 127.6, 126.8, 121.6, 120.6, 117.9, 69.5, 47.8, 32.5. The analytical data are consistent with the literature.<sup>11</sup>

### 3-(3-Methylbenzyl)chroman-4-one (**2b**)

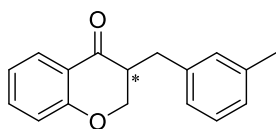

Purification by flash column chromatography (silica gel, PE:EA = 10:1) afforded the product as yellow oil; 31.1 mg, yield: 99%; 97% ee;  $[\alpha]_{\text{D}}^{25} = +9.2$  ( $c = 1.0$ ,  $\text{CH}_2\text{Cl}_2$ ); HPLC (Lux 5u Amylose-2, *i*-propanol/*n*-hexane = 10/90, flow rate = 1.0 mL/min,  $l = 254$  nm)  $t_{\text{R}} = 6.9$  min (major), 9.5 min (minor).  $^1\text{H}$  NMR (600 MHz, Chloroform-*d*)  $\delta$  7.94 (dd,  $J = 7.9$ , 1.8 Hz, 1H), 7.50 – 7.47 (m, 1H), 7.24 – 7.20 (m, 1H), 7.07 – 7.03 (m, 4H), 6.98 (d,  $J = 8.3$  Hz, 1H), 4.38 (dd,  $J = 11.5$ , 4.3 Hz, 1H), 4.19 (dd,  $J = 11.5$ , 8.4 Hz, 1H), 3.26 (dd,  $J = 14.0$ , 4.3 Hz, 1H), 2.95 – 2.90 (m, 1H), 2.67 (dd,  $J = 14.0$ , 10.6 Hz, 1H), 2.35 (s, 3H).  $^{13}\text{C}$  NMR (151 MHz, Chloroform-*d*)  $\delta$  194.0, 161.7, 138.4, 138.3, 136.0, 129.9, 128.7, 127.6, 127.5, 126.2, 121.6, 120.7, 117.9, 69.5, 47.8, 32.4, 21.5. HRMS (ESI)  $m/z$ :  $[\text{M} + \text{H}]^+$  Calcd for  $\text{C}_{17}\text{H}_{17}\text{O}_2$  253.1223; Found 253.1218.

### 3-(3-Methoxybenzyl)chroman-4-one (**2c**)

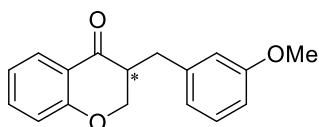

Purification by flash column chromatography (silica gel, PE:EA = 10:1) afforded the product as white solid; 32.2 mg, yield: 96%; 97% ee;  $[\alpha]_{\text{D}}^{25} = +10.2$  ( $c = 1.0$ ,  $\text{CH}_2\text{Cl}_2$ ); HPLC (Lux 5u Amylose-1, *i*-propanol/*n*-hexane = 10/90, flow rate = 1.0 mL/min,  $l = 254$  nm)  $t_{\text{R}} = 9.9$  min (major), 10.9 min (minor).  $^1\text{H}$  NMR (600 MHz, Chloroform-*d*)  $\delta$  7.93 (dd,  $J = 7.9$ , 1.8 Hz, 1H), 7.49 – 7.47 (m, 1H), 7.26 – 7.23 (m, 1H), 7.05 – 7.02 (m, 1H), 6.97 (dd,  $J = 8.4$ , 1.0 Hz, 1H), 6.84 – 6.82 (m, 1H), 6.80

– 6.78 (m, 2H), 4.38 (dd,  $J = 11.5, 4.4$  Hz, 1H), 4.18 (dd,  $J = 11.5, 8.5$  Hz, 1H), 3.81 (s, 3H), 3.27 (dd,  $J = 14.0, 4.5$  Hz, 1H), 2.96 – 2.91 (m, 1H), 2.68 (dd,  $J = 14.0, 10.5$  Hz, 1H).  $^{13}\text{C}$  NMR (151 MHz, Chloroform- $d$ )  $\delta$  193.9, 161.7, 160.0, 140.0, 136.0, 129.8, 127.6, 121.6, 121.5, 120.6, 117.9, 114.9, 112.1, 69.5, 55.3, 47.7, 32.5. The analytical data are consistent with the literature.<sup>12</sup>

### 3-(3-Fluorobenzyl)chroman-4-one (**2d**)

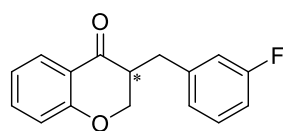

Purification by flash column chromatography (silica gel, PE:EA = 10:1) afforded the product as white solid; 31.3 mg, yield: 98%; 97% ee;  $[\alpha]_{\text{D}}^{25} = + 7.1$  ( $c = 1.0, \text{CH}_2\text{Cl}_2$ ); HPLC (Lux 5u Amylose-2, *i*-propanol/*n*-hexane = 10/90, flow rate = 1.0 mL/min,  $l = 254$  nm)  $t_{\text{R}} = 9.0$  min (major), 10.8 min (minor). MP: 46-49 °C.  $^1\text{H}$  NMR (600 MHz, Chloroform- $d$ )  $\delta$  7.93 (dd,  $J = 7.9, 1.8$  Hz, 1H), 7.50 – 7.47 (m, 1H), 7.30 – 7.27 (m, 1H), 7.05 – 7.01 (m, 2H), 6.98 – 6.93 (m, 3H), 4.38 (dd,  $J = 11.5, 4.4$  Hz, 1H), 4.17 (dd,  $J = 11.5, 8.7$  Hz, 1H), 3.28 (dd,  $J = 14.1, 4.7$  Hz, 1H), 2.96 – 2.92 (m, 1H), 2.72 (dd,  $J = 14.1, 10.2$  Hz, 1H).  $^{13}\text{C}$  NMR (151 MHz, Chloroform- $d$ )  $\delta$  193.5, 163.9, 162.3, 161.6, 140.9 (d,  $J = 7.3$  Hz), 136.1, 130.3, 130.2, 127.6, 124.9, 124.8, 121.7, 120.6, 117.9, 116.2, 116.0, 113.8, 113.7, 69.5, 47.5, 32.2. HRMS (ESI)  $m/z$ :  $[\text{M} + \text{H}]^+$  Calcd for  $\text{C}_{16}\text{H}_{14}\text{FO}_2$  257.0972; Found 257.0967.

### 3-(4-methylbenzyl)chroman-4-one (**2e**)

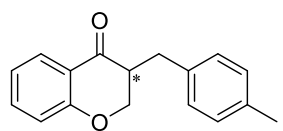

Purification by flash column chromatography (silica gel, PE:EA = 10:1) afforded the product as yellow oil; 31.2 mg, yield: 99%; 97% ee;  $[\alpha]_{\text{D}}^{25} = + 8.7$  ( $c = 1.0, \text{CH}_2\text{Cl}_2$ ); HPLC (Lux 5u Amylose-2, *i*-propanol/*n*-hexane = 10/90, flow rate = 1.0 mL/min,  $l = 210$  nm)  $t_{\text{R}} = 7.5$  min (major), 9.7 min (minor).  $^1\text{H}$  NMR (400 MHz, Chloroform- $d$ )  $\delta$  7.93 (dd,  $J = 7.9, 1.7$  Hz, 1H), 7.50 – 7.46 (m, 1H), 7.14 (s, 4H), 7.06 – 7.02 (m, 1H), 6.97 (dd,  $J = 8.3, 1.0$  Hz, 1H), 4.37 (dd,  $J = 11.5, 4.3$  Hz, 1H), 4.18 (dd,  $J = 11.5, 8.2$  Hz, 1H), 3.24 (dd,  $J = 14.0, 4.5$  Hz, 1H), 2.94 – 2.87 (m, 1H), 2.69 (dd,  $J = 14.0, 10.4$  Hz, 1H), 2.34 (s, 3H).  $^{13}\text{C}$  NMR (101 MHz, Chloroform- $d$ )  $\delta$  194.0, 161.7, 136.3, 136.0, 135.2, 129.5, 129.1, 127.6, 121.5, 120.7, 117.9, 69.5, 47.9, 32.1, 21.1. The analytical data are consistent with the literature.<sup>14</sup>

### 3-(4-Methoxybenzyl)chroman-4-one (**2f**)

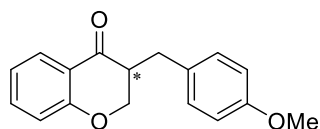

Purification by flash column chromatography (silica gel, PE:EA = 10:1) afforded the product as white solid; 32.8 mg, yield: 98%; 94% ee;  $[\alpha]_{\text{D}}^{25} = + 14.0$  ( $c = 1.0, \text{CH}_2\text{Cl}_2$ ); HPLC (Lux 5u Amylose-2, *i*-

propanol/*n*-hexane = 10/90, flow rate = 1.0 mL/min, *l* = 210 nm)  $t_R$  = 12.8 min (major), 18.5 min (minor).  $^1\text{H}$  NMR (600 MHz, Chloroform-*d*)  $\delta$  7.93 (dd,  $J$  = 7.9, 1.8 Hz, 1H), 7.49 – 7.46 (m, 1H), 7.17 – 7.15 (m, 2H), 7.05 – 7.02 (m, 1H), 6.97 (d,  $J$  = 8.3 Hz, 1H), 6.88 – 6.85 (m, 2H), 4.37 (dd,  $J$  = 11.5, 4.3 Hz, 1H), 4.18 (dd,  $J$  = 11.5, 8.1 Hz, 1H), 3.80 (s, 3H), 3.21 (dd,  $J$  = 14.1, 4.6 Hz, 1H), 2.90 – 2.85 (m, 1H), 2.69 (dd,  $J$  = 14.1, 10.3 Hz, 1H).  $^{13}\text{C}$  NMR (151 MHz, Chloroform-*d*)  $\delta$  194.0, 161.7, 158.5, 136.0, 130.2, 127.6, 121.6, 120.7, 117.9, 114.2, 69.5, 55.4, 48.0, 31.7. The analytical data are consistent with the literature.<sup>14</sup>

### 3-(4-Chlorobenzyl)chroman-4-one (**2g**)

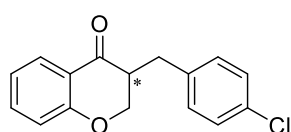

Purification by flash column chromatography (silica gel, PE:EA = 10:1) afforded the product as white solid; 32.3 mg, yield: 95%; 96% ee;  $[\alpha]_D^{25}$  = + 14.2 ( $c$  = 1.0,  $\text{CH}_2\text{Cl}_2$ ); HPLC (Lux 5u Amylose-2, *i*-propanol/*n*-

hexane = 10/90, flow rate = 1.0 mL/min, *l* = 210 nm)  $t_R$  = 8.1 min (major), 9.4 min (minor).  $^1\text{H}$  NMR (600 MHz, Chloroform-*d*)  $\delta$  7.92 (dd,  $J$  = 7.9, 1.8 Hz, 1H), 7.50 – 7.47 (m, 1H), 7.30 – 7.28 (m, 2H), 7.19 – 7.16 (m, 2H), 7.05 – 7.03 (m, 1H), 6.97 (d,  $J$  = 7.3 Hz, 1H), 4.37 (dd,  $J$  = 11.6, 4.3 Hz, 1H), 4.16 (dd,  $J$  = 11.6, 8.5 Hz, 1H), 3.23 (dd,  $J$  = 14.1, 4.7 Hz, 1H), 2.92 – 2.88 (m, 1H), 2.72 (dd,  $J$  = 14.1, 10.0 Hz, 1H).  $^{13}\text{C}$  NMR (151 MHz, Chloroform-*d*)  $\delta$  193.5, 161.6, 136.8, 136.1, 132.6, 130.5, 128.9, 127.6, 121.7, 120.6, 117.9, 69.4, 47.6, 31.9. The analytical data are consistent with the literature.<sup>14</sup>

### 3-(2-Methylbenzyl)chroman-4-one (**2h**)

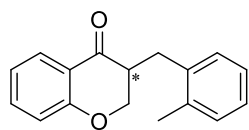

Purification by flash column chromatography (silica gel, PE:EA = 10:1) afforded the product as yellow oil; 30.3 mg, yield: 96%; 90% ee;  $[\alpha]_D^{25}$  = - 15.7 ( $c$  = 1.0,  $\text{CH}_2\text{Cl}_2$ ); HPLC (Lux 5u Amylose-2, *i*-propanol/*n*-hexane =

10/90, flow rate = 1.0 mL/min, *l* = 210 nm)  $t_R$  = 6.8 min (major), 8.9 min (minor).  $^1\text{H}$  NMR (600 MHz, Chloroform-*d*)  $\delta$  7.95 (dd,  $J$  = 7.9, 1.8 Hz, 1H), 7.51 – 7.48 (m, 1H), 7.21 – 7.16 (m, 4H), 7.07 – 7.04 (m, 1H), 6.99 (dd,  $J$  = 8.4, 1.0 Hz, 1H), 4.37 (dd,  $J$  = 11.5, 4.3 Hz, 1H), 4.21 (dd,  $J$  = 11.5, 8.0 Hz, 1H), 3.34 (dd,  $J$  = 14.2, 4.2 Hz, 1H), 2.92 – 2.87 (m, 1H), 2.67 (dd,  $J$  = 14.2, 11.0 Hz, 1H), 2.37 (s, 3H).  $^{13}\text{C}$  NMR (151 MHz, Chloroform-*d*)  $\delta$  161.7, 136.6, 136.0, 130.8, 130.0, 127.6, 127.0, 126.2, 121.6, 120.6, 117.9, 69.5, 46.6, 29.9, 19.5. HRMS (ESI)  $m/z$ :  $[\text{M} + \text{H}]^+$  Calcd for  $\text{C}_{17}\text{H}_{17}\text{O}_2$  253.1223; Found 253.1220.



### 3-(2-Methoxybenzyl)chroman-4-one (**2i**)

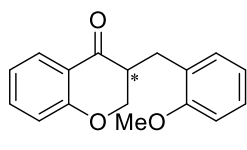

Purification by flash column chromatography (silica gel, PE:EA = 10:1) afforded the product as white solid; 31.8 mg, yield: 95%; 88% ee;  $[\alpha]_{\text{D}}^{25} = -26.6$  ( $c = 1.0$ ,  $\text{CH}_2\text{Cl}_2$ ); HPLC (Lux 5u Amylose-2, *i*-propanol/*n*-hexane = 10/90, flow rate = 1.0 mL/min,  $l = 210$  nm)  $t_{\text{R}} = 8.3$  min (major), 10.7 min (minor).  $^1\text{H}$  NMR (600 MHz, Chloroform-*d*)  $\delta$  7.93 (dd,  $J = 7.9$ , 1.8 Hz, 1H), 7.48 – 7.45 (m, 1H), 7.25 – 7.22 (m, 1H), 7.18 (dd,  $J = 7.4$ , 1.7 Hz, 1H), 7.04 – 7.01 (m, 1H), 6.95 (dd,  $J = 8.4$ , 1.0 Hz, 1H), 6.92 – 6.90 (m, 1H), 6.87 (d,  $J = 8.3$  Hz, 1H), 4.37 (dd,  $J = 11.5$ , 4.6 Hz, 1H), 4.19 (dd,  $J = 11.5$ , 9.4 Hz, 1H), 3.82 (s, 3H), 3.39 (dd,  $J = 13.7$ , 4.9 Hz, 1H), 3.11 – 3.07 (m, 1H), 2.67 (dd,  $J = 13.8$ , 9.9 Hz, 1H).  $^{13}\text{C}$  NMR (151 MHz, Chloroform-*d*)  $\delta$  194.3, 161.7, 157.7, 135.8, 131.2, 128.1, 127.5, 126.8, 121.4, 120.8, 120.6, 117.8, 110.4, 70.2, 55.3, 46.1, 27.4. The analytical data are consistent with the literature.<sup>13</sup>

### 3-(2-Bromobenzyl)chroman-4-one (**2j**)

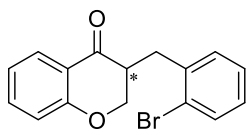

Purification by flash column chromatography (silica gel, PE:EA = 10:1) afforded the product as yellow oil; 38.3 mg, yield: 97%; 92% ee;  $[\alpha]_{\text{D}}^{25} = -65.6$  ( $c = 1.0$ ,  $\text{CH}_2\text{Cl}_2$ ); HPLC (Lux 5u Amylose-2, *i*-propanol/*n*-hexane = 10/90, flow rate = 1.0 mL/min,  $l = 210$  nm)  $t_{\text{R}} = 8.5$  min (major), 10.7 min (minor).  $^1\text{H}$  NMR (600 MHz, Chloroform-*d*)  $\delta$  7.93 (dd,  $J = 7.9$ , 1.8 Hz, 1H), 7.57 (d,  $J = 8.7$  Hz, 1H), 7.49 – 7.46 (m, 1H), 7.29 – 7.27 (m, 2H), 7.14 – 7.10 (m, 1H), 7.04 (dd,  $J = 7.9$ , 1.0 Hz, 1H), 6.97 (d,  $J = 8.4$  Hz, 1H), 4.41 (dd,  $J = 11.5$ , 4.6 Hz, 1H), 4.25 – 4.21 (m, 1H), 3.49 (dd,  $J = 14.1$ , 5.1 Hz, 1H), 3.16 – 3.12 (m, 1H), 2.81 (dd,  $J = 14.1$ , 9.7 Hz, 1H).  $^{13}\text{C}$  NMR (151 MHz, Chloroform-*d*)  $\delta$  193.5, 161.7, 138.0, 136.0, 133.3, 131.6, 128.6, 127.7, 127.6, 124.8, 121.6, 120.6, 117.9, 69.8, 46.0, 32.7. HRMS (ESI)  $m/z$ :  $[\text{M} + \text{H}]^+$  Calcd for  $\text{C}_{16}\text{H}_{14}^{79}\text{BrO}_2$  317.0172; Found 317.0170. HRMS (ESI)  $m/z$ :  $[\text{M} + \text{H}]^+$  Calcd for  $\text{C}_{16}\text{H}_{14}^{81}\text{BrO}_2$  319.0152; Found 318.0159.

### 3-(2-Fluorobenzyl)chroman-4-one (**2k**)

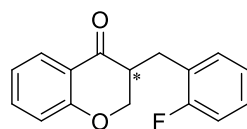

Purification by flash column chromatography (silica gel, PE:EA = 10:1) afforded the product as colorless oil; 31.0 mg, yield: 97%; 93% ee;  $[\alpha]_{\text{D}}^{25} = -19.7$  ( $c = 1.0$ ,  $\text{CH}_2\text{Cl}_2$ ); HPLC (Lux 5u Amylose-2, *i*-propanol/*n*-hexane = 10/90, flow rate = 1.0 mL/min,  $l = 210$  nm)  $t_{\text{R}} = 8.1$  min (major), 10.3 min (minor).  $^1\text{H}$  NMR (600 MHz, Chloroform-*d*)  $\delta$  7.92 (dd,  $J = 7.9$ , 1.8 Hz, 1H), 7.48 – 7.45 (m, 1H), 7.27 – 7.21 (m, 2H),

7.11 – 7.08 (m, 1H), 7.06 – 7.01 (m, 2H), 6.96 (dd,  $J = 8.4, 1.1$  Hz, 1H), 4.41 (dd,  $J = 11.5, 4.6$  Hz, 1H), 4.19 (dd,  $J = 11.5, 9.6$  Hz, 1H), 3.37 – 3.33 (m, 1H), 3.05 – 3.00 (m, 1H), 2.78 (dd,  $J = 14.8, 9.2$  Hz, 1H).  $^{13}\text{C}$  NMR (151 MHz, Chloroform-*d*)  $\delta$  193.4, 162.2, 161.7, 160.6, 136.0, 131.7, 131.6, 128.7, 128.6, 127.6, 125.5, 125.4, 124.4 (d,  $J = 3.5$  Hz), 121.6, 120.6, 117.9, 115.6, 115.5, 69.9, 46.5, 25.7. HRMS (ESI)  $m/z$ :  $[\text{M} + \text{H}]^+$  Calcd for  $\text{C}_{16}\text{H}_{14}\text{FO}_2$  257.0972; Found 257.0967.

### 3-(Furan-2-ylmethyl)chroman-4-one (**2l**)

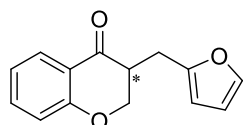

Purification by flash column chromatography (silica gel, PE:EA = 10:1) afforded the product as yellow oil; 27.4 mg, yield: 96%; 98% ee;  $[\alpha]_{\text{D}}^{25} = -29.7$  ( $c = 1.0, \text{CH}_2\text{Cl}_2$ ); HPLC (Lux 5u Cellulose-2, *i*-propanol/*n*-hexane =

10/90, flow rate = 1.0 mL/min,  $l = 210$  nm)  $t_{\text{R}} = 7.0$  min (minor), 7.4 min (major);  $^1\text{H}$  NMR (600 MHz, Chloroform-*d*)  $\delta$  7.91 (dd,  $J = 7.9, 1.8$  Hz, 1H), 7.49 – 7.46 (m, 1H), 7.33 (dd,  $J = 1.9, 0.8$  Hz, 1H), 7.04 – 7.01 (m, 1H), 6.96 (d,  $J = 8.4$  Hz, 1H), 6.30 (dd,  $J = 3.2, 1.9$  Hz, 1H), 6.12 (d,  $J = 2.3$  Hz, 1H), 4.52 (dd,  $J = 11.5, 4.7$  Hz, 1H), 4.20 (dd,  $J = 11.5, 10.1$  Hz, 1H), 3.30 (dd,  $J = 15.4, 4.4$  Hz, 1H), 3.11 – 3.06 (m, 1H), 2.82 (dd,  $J = 15.4, 9.6$  Hz, 1H).  $^{13}\text{C}$  NMR (151 MHz, Chloroform-*d*)  $\delta$  193.1, 161.8, 152.2, 141.8, 136.0, 127.6, 121.6, 120.6, 117.9, 110.5, 107.2, 70.2, 45.4, 24.6. HRMS (ESI)  $m/z$ :  $[\text{M} + \text{H}]^+$  Calcd for  $\text{C}_{14}\text{H}_{13}\text{O}_3$  229.0859; Found 229.0856.

### 3-(Naphthalen-2-ylmethyl)chroman-4-one (**2m**)

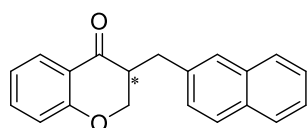

Purification by flash column chromatography (silica gel, PE:EA = 10:1) afforded the product as white solid; 34.2 mg, yield: 95%; 89% ee;  $[\alpha]_{\text{D}}^{25} = +12.6$  ( $c = 1.0, \text{CH}_2\text{Cl}_2$ ); HPLC (Lux 5u Amylose-2, *i*-

*propanol/n*-hexane = 10/90, flow rate = 1.0 mL/min,  $l = 210$  nm)  $t_{\text{R}} = 11.1$  min (major), 12.7 min (minor).  $^1\text{H}$  NMR (600 MHz, Chloroform-*d*)  $\delta$  7.97 – 7.95 (m, 1H), 7.84 – 7.80 (m, 3H), 7.70 (s, 1H), 7.51 – 7.45 (m, 3H), 7.39 (dd,  $J = 8.3, 1.8$  Hz, 1H), 7.06 (t,  $J = 7.5$  Hz, 1H), 6.99 (d,  $J = 8.4$  Hz, 1H), 4.39 (dd,  $J = 11.6, 4.3$  Hz, 1H), 4.21 (dd,  $J = 11.5, 8.4$  Hz, 1H), 3.46 (dd,  $J = 14.0, 4.4$  Hz, 1H), 3.07 – 3.02 (m, 1H), 2.89 (dd,  $J = 14.1, 10.5$  Hz, 1H).  $^{13}\text{C}$  NMR (151 MHz, Chloroform-*d*)  $\delta$  193.9, 161.7, 136.1, 135.8, 133.6, 132.4, 128.6, 127.8, 127.6, 127.3, 126.3, 125.8, 121.6, 120.7, 117.9, 69.5, 47.7, 32.7. The analytical data are consistent with the literature.<sup>15</sup>

### 3-(Naphthalen-1-ylmethyl)chroman-4-one (**2n**)

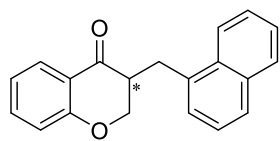

Purification by flash column chromatography (silica gel, PE:EA = 10:1)

afforded the product as white solid; 34.6 mg, yield: 96%; 97% ee;  $[\alpha]_{\text{D}}^{25}$

= - 46.5 (c = 1.0, CH<sub>2</sub>Cl<sub>2</sub>); HPLC (Lux 5u Amylose-2, *i*-propanol/*n*-

hexane = 10/90, flow rate = 1.0 mL/min,  $l$  = 210 nm)  $t_{\text{R}}$  = 8.7 min (major), 11.4 min (minor). MP:

97-100 °C. <sup>1</sup>H NMR (600 MHz, Chloroform-*d*)  $\delta$  8.13 (d,  $J$  = 7.2 Hz, 1H), 8.00 (dd,  $J$  = 7.9, 1.8 Hz,

1H), 7.89 (d,  $J$  = 7.5 Hz, 1H), 7.79 (d,  $J$  = 8.1 Hz, 1H), 7.58 – 7.55 (m, 1H), 7.53 – 7.49 (m, 2H),

7.44 (dd,  $J$  = 8.2, 6.9 Hz, 1H), 7.39 (d,  $J$  = 6.3 Hz, 1H), 7.08 – 7.05 (m, 1H), 6.99 (dd,  $J$  = 8.3, 1.0

Hz, 1H), 4.33 (dd,  $J$  = 11.6, 4.4 Hz, 1H), 4.23 (dd,  $J$  = 11.6, 8.0 Hz, 1H), 3.93 (dd,  $J$  = 14.2, 3.7 Hz,

1H), 3.13 – 3.09 (m, 1H), 3.00 (dd,  $J$  = 14.2, 11.0 Hz, 1H). <sup>13</sup>C NMR (151 MHz, Chloroform-*d*)  $\delta$

194.0, 161.8, 136.1, 134.4, 134.2, 131.8, 129.1, 127.8, 127.7, 127.7, 126.5, 125.9, 125.5, 123.7,

121.6, 120.6, 118.0, 69.7, 46.9, 29.8. HRMS (ESI)  $m/z$ : [M + H]<sup>+</sup> Calcd for C<sub>20</sub>H<sub>17</sub>O<sub>2</sub> 289.1223;

Found 289.1220.

### 3-Isobutylchroman-4-one (**2o**)

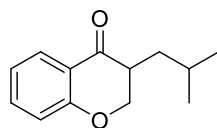

Purification by flash column chromatography (silica gel, PE:EA = 20:1)

afforded the product as colorless oil; 12.3 mg, yield: 48%; rac; HPLC (Lux 5u

Amylose-2, *i*-propanol/*n*-hexane = 10/90, flow rate = 1.0 mL/min,  $l$  = 210 nm)

$t_{\text{R}}$  = 5.8 min, 6.1 min. <sup>1</sup>H NMR (600 MHz, Chloroform-*d*)  $\delta$  7.88 (d,  $J$  = 7.9 Hz, 1H), 7.45 (t,  $J$  = 7.8

Hz, 1H), 7.00 (t,  $J$  = 7.5 Hz, 1H), 6.94 (d,  $J$  = 8.3 Hz, 1H), 4.49 (dd,  $J$  = 11.5, 4.1 Hz, 1H), 4.27 –

4.18 (m, 1H), 2.74 – 2.69 (m, 1H), 1.79 – 1.69 (m, 2H), 1.32 (d,  $J$  = 5.2 Hz, 1H), 0.96 (d,  $J$  = 6.1

Hz, 3H), 0.92 (d,  $J$  = 6.1 Hz, 3H). The analytical data are consistent with the literature.<sup>20</sup>

### 3-isobutyl-4*H*-chromen-4-one (**2o'**)

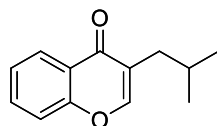

Purification by flash column chromatography (silica gel, PE:EA = 20:1)

afforded the product as colorless oil; 11.9 mg, yield: 47%; <sup>1</sup>H NMR (600 MHz,

Chloroform-*d*)  $\delta$  8.21 (dd,  $J$  = 8.0, 1.8 Hz, 1H), 7.71 (s, 1H), 7.65 – 7.59 (m,

1H), 7.41 (d,  $J$  = 8.3 Hz, 1H), 7.39 – 7.33 (m, 1H), 2.30 (d,  $J$  = 7.0 Hz, 2H), 2.01 – 1.98 (m, 1H),

0.92 (d,  $J$  = 6.7 Hz, 6H). The analytical data are consistent with the literature.<sup>20</sup>

### 3-Benzyl-6-methylchroman-4-one (**2p**)

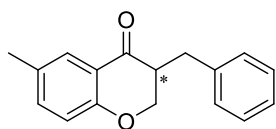

Purification by flash column chromatography (silica gel, PE:EA = 10:1)

afforded the product as white solid; 30.9 mg, yield: 98%; 96% ee;  $[\alpha]_{\text{D}}^{25}$

= + 9.4 (c = 1.0, CH<sub>2</sub>Cl<sub>2</sub>); HPLC (Lux 5u Amylose-2, *i*-propanol/*n*-

hexane = 10/90, flow rate = 1.0 mL/min, *l* = 210 nm) *t*<sub>R</sub> = 6.7 min (major), 7.1 min (minor). <sup>1</sup>H

NMR (400 MHz, Chloroform-*d*) δ 7.73 (dd, *J* = 2.2, 1.0 Hz, 1H), 7.35 – 7.22 (m, 7H), 6.87 (d, *J* =

8.4 Hz, 1H), 4.34 (dd, *J* = 11.5, 4.3 Hz, 1H), 4.15 (dd, *J* = 11.5, 8.2 Hz, 1H), 3.28 (dd, *J* = 13.9, 4.4

Hz, 1H), 2.93 – 2.87 (m, 1H), 2.71 (dd, *J* = 13.9, 10.4 Hz, 1H), 2.32 (s, 3H). <sup>13</sup>C NMR (101 MHz,

Chloroform-*d*) δ 194.2, 159.7, 138.4, 137.1, 131.0, 129.2, 128.8, 127.1, 126.7, 120.2, 117.7, 69.5,

47.8, 32.6, 20.5. The analytical data are consistent with the literature.<sup>16</sup>

### (*R*)-2-Benzyl-3,4-dihydronaphthalen-1(2*H*)-one (**2q**)

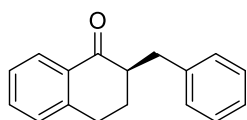

Purification by flash column chromatography (silica gel, PE:EA = 10:1)

afforded the product as colorless oil; 29.2 mg, yield: 99%; 92% ee;  $[\alpha]_{\text{D}}^{25}$

= + 8.8 (c = 1.0, CH<sub>2</sub>Cl<sub>2</sub>); HPLC (Lux 5u Amylose-2, *i*-propanol/*n*-hexane

= 2/98, flow rate = 1.0 mL/min, *l* = 210 nm) *t*<sub>R</sub> = 10.4 min (major), 11.0 min (minor). <sup>1</sup>H NMR (600

MHz, Chloroform-*d*) δ 8.08 (dd, *J* = 7.8, 1.4 Hz, 1H), 7.48 – 7.46 (m, 1H), 7.34 – 7.30 (m, 3H),

7.25 – 7.22 (m, 4H), 3.51 (dd, *J* = 13.8, 4.1 Hz, 1H), 2.99 – 2.89 (m, 2H), 2.78 – 2.73 (m, 1H), 2.66

(dd, *J* = 13.8, 9.6 Hz, 1H), 2.14 – 2.09 (m, 1H), 1.83 – 1.76 (m, 1H). <sup>13</sup>C NMR (151 MHz,

Chloroform-*d*) δ 199.5, 144.1, 140.2, 133.4, 132.6, 129.4, 128.8, 128.5, 127.7, 126.7, 126.2, 49.6,

35.8, 28.7, 27.8. The analytical data are consistent with the literature.<sup>2</sup>

### (*R*)-2-Benzylcyclohexan-1-one (**2r**)

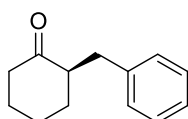

Purification by flash column chromatography (silica gel, PE:EA = 10:1) afforded

the product as colorless oil; 22.6 mg, yield: 96%; 93% ee;  $[\alpha]_{\text{D}}^{25}$  = + 35.0 (c =

1.0, CH<sub>2</sub>Cl<sub>2</sub>); HPLC (Lux 5u Cellulose-3, *i*-propanol/*n*-hexane = 3/97, flow rate

= 1.0 mL/min, *l* = 210 nm) *t*<sub>R</sub> = 7.1 min (major), 7.5 min (minor); <sup>1</sup>H NMR (400 MHz, Chloroform-

*d*) δ 7.29 – 7.24 (m, 2H), 7.20 – 7.13 (m, 3H), 3.26 – 3.20 (m, 1H), 2.59 – 2.51 (m, 1H), 2.46 – 2.28

(m, 3H), 2.09 – 1.98 (m, 2H), 1.85 – 1.78 (m, 1H), 1.73 – 1.51 (m, 2H), 1.40 – 1.26 (m, 1H). <sup>13</sup>C

NMR (101 MHz, Chloroform-*d*) δ 212.6, 140.5, 129.2, 128.4, 126.1, 52.6, 42.3, 35.6, 33.5, 28.2,

25.2. The analytical data are consistent with the literature.<sup>2</sup>

### 2-Benzyl-2,3-dihydro-1*H*-inden-1-one (**2s**)

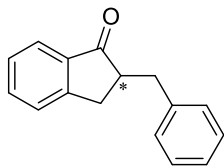

Purification by flash column chromatography (silica gel, PE:EA = 10:1) afforded the product as yellow oil; 26.9 mg, yield: 97%; 69% ee;  $[\alpha]_{\text{D}}^{25} = +20.3$  ( $c = 1.0$ ,  $\text{CH}_2\text{Cl}_2$ ); HPLC (Lux 5u Amylose-2, *i*-propanol/*n*-hexane = 10/90, flow rate = 1.0 mL/min,  $l = 210$  nm)  $t_{\text{R}} = 8.5$  min (major), 9.7 min (minor).  $^1\text{H}$  NMR (600 MHz, Chloroform-*d*)  $\delta$  7.80 (d,  $J = 7.7$  Hz, 1H), 7.59 – 7.56 (m, 1H), 7.41 – 7.36 (m, 2H), 7.31 (t,  $J = 7.5$  Hz, 2H), 7.27 – 7.21 (m, 3H), 3.41 (dd,  $J = 14.0$ , 4.3 Hz, 1H), 3.17 (dd,  $J = 17.2$ , 7.8 Hz, 1H), 3.03 – 2.98 (m, 1H), 2.87 (dd,  $J = 17.1$ , 4.1 Hz, 1H), 2.68 (dd,  $J = 14.0$ , 10.4 Hz, 1H).  $^{13}\text{C}$  NMR (151 MHz, Chloroform-*d*)  $\delta$  207.9, 153.8, 139.8, 136.7, 134.9, 129.0, 128.7, 127.6, 126.7, 126.5, 124.1, 49.0, 37.1, 32.3. The analytical data are consistent with the literature.<sup>3</sup>

### (*S*)-2-Benzylcyclopentan-1-one (**2t**)

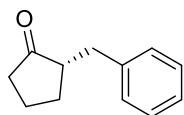

Purification by flash column chromatography (silica gel, PE:EA = 10:1) afforded the product as colorless oil; 20.2 mg, yield: 93%; 69% ee;  $[\alpha]_{\text{D}}^{25} = +68.9$  ( $c = 1.0$ ,  $\text{CH}_2\text{Cl}_2$ ); HPLC (Lux 5u Amylose-2, *i*-propanol/*n*-hexane = 10/90, flow rate = 1.0 mL/min,  $l = 210$  nm)  $t_{\text{R}} = 6.3$  min (major), 6.7 min (minor).  $^1\text{H}$  NMR (400 MHz, Chloroform-*d*)  $\delta$  7.29 – 7.25 (m, 2H), 7.21 – 7.14 (m, 3H), 3.14 (dd,  $J = 13.8$ , 4.1 Hz, 1H), 2.53 (dd,  $J = 13.9$ , 9.5 Hz, 1H), 2.38 – 2.28 (m, 2H), 2.14 – 2.02 (m, 2H), 1.98 – 1.90 (m, 1H), 1.77 – 1.65 (m, 1H), 1.59 – 1.49 (m, 1H).  $^{13}\text{C}$  NMR (101 MHz, Chloroform-*d*)  $\delta$  220.3, 140.1, 129.0, 128.5, 126.3, 51.1, 38.3, 35.7, 29.2, 20.7. The analytical data are consistent with the literature.<sup>2</sup>

### (*R*)-2-methyl-1,3-diphenylpropan-1-one (**2u**)

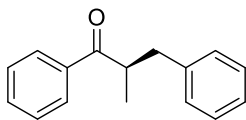

Purification by flash column chromatography (silica gel, PE:EA = 10:1) afforded the product as colorless oil; 27.4 mg, yield: 98%; 89% ee;  $[\alpha]_{\text{D}}^{25} = -47.5$  ( $c = 1.0$ ,  $\text{CH}_2\text{Cl}_2$ ); HPLC (Lux 5u Amylose-2, *i*-propanol/*n*-hexane = 10/90, flow rate = 1.0 mL/min,  $l = 210$  nm)  $t_{\text{R}} = 5.1$  min (minor), 5.5 min (major).  $^1\text{H}$  NMR (400 MHz, Chloroform-*d*)  $\delta$  7.95 – 7.93 (m, 2H), 7.56 – 7.52 (m, 1H), 7.51 – 7.40 (m, 2H), 7.29 – 7.17 (m, 5H), 3.76 (h,  $J = 7.0$  Hz, 1H), 3.19 (dd,  $J = 13.7$ , 6.3 Hz, 1H), 2.71 (dd,  $J = 13.7$ , 7.8 Hz, 1H), 1.21 (d,  $J = 6.9$  Hz, 3H).  $^{13}\text{C}$  NMR (101 MHz, Chloroform-*d*)  $\delta$  203.9, 140.1, 136.6, 133.1, 129.2, 128.8, 128.5, 128.4, 126.3, 42.9, 39.5, 17.5. The analytical data are consistent with the literature.<sup>2</sup>

### 3,5-dibenzyltetrahydro-4*H*-pyran-4-one (**4a**)

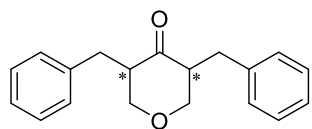

Purification by flash column chromatography (silica gel, PE:EA = 10:1) afforded the product as colorless oil; 34.3 mg, yield: 98%; *trans:cis* = 13:1; >99% ee;  $[\alpha]_D^{25} = +40.6$  (c = 1.0, CH<sub>2</sub>Cl<sub>2</sub>); HPLC

(Lux 5u Cellulose-1, *i*-propanol/*n*-hexane = 5/95, flow rate = 1.0 mL/min, *l* = 210 nm) *t<sub>R</sub>* = 9.6 min (minor), 10.4 min (major); *trans*-**4a**: <sup>1</sup>H NMR (600 MHz, Chloroform-*d*) δ 7.29 (t, *J* = 7.5 Hz, 4H), 7.22 (t, *J* = 7.5 Hz, 2H), 7.16 (d, *J* = 7.4 Hz, 4H), 3.89 (dd, *J* = 11.4, 4.8 Hz, 2H), 3.66 (dd, *J* = 11.5, 6.3 Hz, 2H), 3.14 (dd, *J* = 14.0, 5.3 Hz, 2H), 2.92 – 2.85 (m, 2H), 2.71 (dd, *J* = 13.9, 9.4 Hz, 2H). <sup>13</sup>C NMR (151 MHz, Chloroform-*d*) δ 210.0, 138.6, 129.0, 128.7, 126.6, 72.0, 51.9, 33.7. HRMS (ESI) *m/z*: [M + H]<sup>+</sup> Calcd for C<sub>19</sub>H<sub>21</sub>O<sub>2</sub> 281.1536; Found 281.1533.

### 3,5-bis(4-methylbenzyl)tetrahydro-4*H*-pyran-4-one (**4b**)

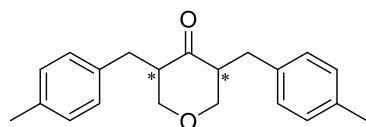

Purification by flash column chromatography (silica gel, PE:EA = 10:1) afforded the product as white solid; 38.1 mg, yield: 99%; *trans:cis* >20:1; >99% ee;  $[\alpha]_D^{25} = -38.0$  (c = 1.0, CH<sub>2</sub>Cl<sub>2</sub>);

HPLC (Lux 5u Cellulose-2, *i*-propanol/*n*-hexane = 10/90, flow rate = 1.0 mL/min, *l* = 210 nm) *t<sub>R</sub>* = 7.1 min (major), 7.8 min (minor); MP: 59-61°C. *trans*-**4b**: <sup>1</sup>H NMR (600 MHz, Chloroform-*d*) δ 7.10 (d, *J* = 7.7 Hz, 4H), 7.05 (d, *J* = 8.0 Hz, 4H), 3.88 (dd, *J* = 11.4, 4.8 Hz, 2H), 3.65 (dd, *J* = 11.4, 6.3 Hz, 2H), 3.09 (dd, *J* = 14.0, 5.4 Hz, 2H), 2.88 – 2.82 (m, 2H), 2.67 (dd, *J* = 14.0, 9.4 Hz, 2H), 2.33 (s, 7H). <sup>13</sup>C NMR (151 MHz, Chloroform-*d*) δ 210.2, 136.1, 135.5, 129.4, 128.9, 72.0, 52.0, 33.3, 21.1. HRMS (ESI) *m/z*: [M + H]<sup>+</sup> Calcd for C<sub>21</sub>H<sub>25</sub>O<sub>2</sub> 309.1849; Found 308.1850.

### (+)-(2*R*,6*R*)-2,6-Dibenzylcyclohexan-1-one (**4c**)

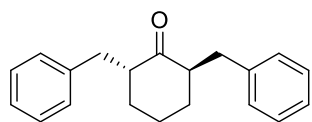

Purification by flash column chromatography (silica gel, PE:EA = 10:1) afforded the product as white solid; 34.4 mg, yield: 99%; *trans:cis* >20:1; >99% ee;  $[\alpha]_D^{25} = +60.3$  (c = 1.0, CH<sub>2</sub>Cl<sub>2</sub>); HPLC

(Lux 5u Cellulose-1, *i*-propanol/*n*-hexane = 10/90, flow rate = 1.0 mL/min, *l* = 210 nm) *t<sub>R</sub>* = 5.4 min (major), 6.1 min (minor); *trans*-**4c**: <sup>1</sup>H NMR (400 MHz, Chloroform-*d*) δ 7.29 – 7.24 (m, 4H), 7.22 – 7.17 (m, 2H), 7.13 (dd, *J* = 6.8, 1.6 Hz, 4H), 3.10 (dd, *J* = 13.7, 5.7 Hz, 2H), 2.81 – 2.74 (m, 2H), 2.61 (dd, *J* = 13.7, 8.9 Hz, 2H), 1.92 – 1.85 (m, 2H), 1.77 – 1.71 (m, 2H), 1.64 – 1.56 (m, 2H). <sup>13</sup>C NMR (101 MHz, Chloroform-*d*) δ 214.8, 139.7, 129.1, 128.5, 126.3, 50.9, 36.3, 32.0, 20.4. The analytical data are consistent with the literature.<sup>4</sup>

(+)-(2*R*,6*R*)-2,6-Bis(3-methylbenzyl)cyclohexan-1-one (**4d**)

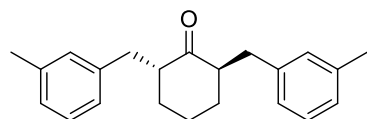

Purification by flash column chromatography (silica gel, PE:EA = 10:1) afforded the product as colorless oil; 37.1 mg, yield: 97%; *trans:cis* = 18:1; >99% ee;  $[\alpha]_D^{25} = + 50.4$  ( $c = 1.0$ ,  $\text{CH}_2\text{Cl}_2$ ); HPLC (Lux 5u Cellulose-1, *i*-propanol/*n*-hexane = 10/90, flow rate = 1.0 mL/min,  $l = 210$  nm)  $t_R = 4.6$  min (major), 6.5 min (minor); *trans*-**4d**:  $^1\text{H NMR}$  (400 MHz, Chloroform-*d*)  $\delta$  7.17 (t,  $J = 7.5$  Hz, 2H), 7.03 (d,  $J = 7.5$  Hz, 2H), 6.97 – 6.93 (m, 4H), 3.08 (dd,  $J = 13.7, 5.4$  Hz, 2H), 2.81 – 2.74 (m, 2H), 2.57 (dd,  $J = 13.7, 9.2$  Hz, 2H), 2.33 (s, 6H), 1.93 – 1.85 (m, 2H), 1.75 (p,  $J = 5.9$  Hz, 2H), 1.64 – 1.56 (m, 2H).  $^{13}\text{C NMR}$  (101 MHz, Chloroform-*d*)  $\delta$  215.1, 139.7, 138.1, 129.9, 128.4, 127.1, 126.1, 50.8, 36.2, 31.9, 21.5, 20.4. The analytical data are consistent with the literature.<sup>4</sup>

2,6-Bis(3-fluorobenzyl)cyclohexan-1-one (**4e**)

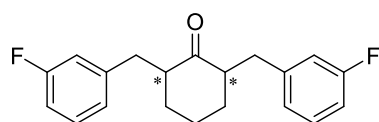

Purification by flash column chromatography (silica gel, PE:EA = 10:1) afforded the product as colorless oil; 38.4 mg, yield: 98%; *trans:cis* >20:1; 99% ee;  $[\alpha]_D^{25} = + 30.5$  ( $c = 1.0$ ,  $\text{CH}_2\text{Cl}_2$ ); HPLC (Lux 5u Amylose-1, *i*-propanol/*n*-hexane = 5/95, flow rate = 1.0 mL/min,  $l = 210$  nm)  $t_R = 6.4$  min (minor), 6.9 min (major); *trans*-**4e**:  $^1\text{H NMR}$  (400 MHz, Chloroform-*d*)  $\delta$  7.24 – 7.19 (m, 2H), 6.91 – 6.81 (m, 6H), 3.09 (dd,  $J = 13.7, 6.1$  Hz, 2H), 2.80 – 2.73 (m, 2H), 2.61 (dd,  $J = 13.7, 8.6$  Hz, 2H), 1.94 – 1.86 (m, 2H), 1.76 (p,  $J = 5.9$  Hz, 2H), 1.65 – 1.56 (m, 2H).  $^{13}\text{C NMR}$  (101 MHz, Chloroform-*d*)  $\delta$  214.0, 164.2, 161.7, 142.2, 142.1, 130.0, 129.9, 124.7 (d,  $J = 2.7$  Hz), 116.0, 115.8, 113.4, 113.2, 50.6, 36.0, 32.0, 20.4. HRMS (ESI)  $m/z$ :  $[\text{M} + \text{H}]^+$  Calcd for  $\text{C}_{20}\text{H}_{21}\text{F}_2\text{O}$  315.1555; Found 315.1553.

(+)-(2*R*,6*R*)-2,6-Bis(4-methylbenzyl)cyclohexan-1-one (**4f**)

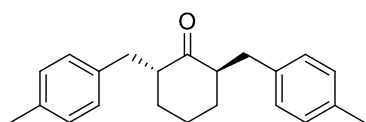

Purification by flash column chromatography (silica gel, PE:EA = 10:1) afforded the product as white solid; 37.1 mg, yield: 97%; *trans:cis* = 11:1; >99% ee;  $[\alpha]_D^{25} = + 43.8$  ( $c = 1.0$ ,  $\text{CH}_2\text{Cl}_2$ ); HPLC (Lux 5u Cellulose-1, *i*-propanol/*n*-hexane = 10/90, flow rate = 1.0 mL/min,  $l = 210$  nm)  $t_R = 4.5$  min (major), 5.3 min (minor); *trans*-**4f**:  $^1\text{H NMR}$  (400 MHz, Chloroform-*d*)  $\delta$  7.11 – 7.03 (m, 9H), 3.08 (dd,  $J = 13.7, 5.6$  Hz, 2H), 2.80 – 2.73 (m, 2H), 2.59 (dd,  $J = 13.8, 9.0$  Hz, 2H), 2.34 (s, 6H), 1.94 – 1.86 (m, 2H), 1.75 (p,  $J = 5.9$  Hz, 2H), 1.65 – 1.56 (m, 2H).  $^{13}\text{C NMR}$  (101 MHz, Chloroform-*d*)  $\delta$  215.1, 136.6, 135.8, 129.2, 129.0, 50.9, 35.9, 32.0, 21.1, 20.5. The analytical data

are consistent with the literature.<sup>4</sup>

#### 2,6-Bis(2-fluorobenzyl)cyclohexan-1-one (**4g**)

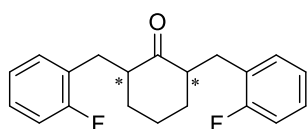

Purification by flash column chromatography (silica gel, PE:EA = 10:1) afforded the product as colorless oil; 37.3 mg, yield: 95%; *trans:cis* = 11:1; >99% ee;  $[\alpha]_D^{25} = +38.3$  (c = 1.0, CH<sub>2</sub>Cl<sub>2</sub>); HPLC

(Lux 5u Amylose-1, *i*-propanol/*n*-hexane = 5/95, flow rate = 1.0 mL/min, *l* = 210 nm) *t<sub>R</sub>* = 6.2 min (major), 6.8 min (minor); *trans*-**4g**: <sup>1</sup>H NMR (600 MHz, Chloroform-*d*) δ 7.19 – 7.15 (m, 2H), 7.14 – 7.11 (m, 2H), 7.04 – 6.99 (m, 4H), 3.09 (dd, *J* = 15.0, 6.8 Hz, 2H), 2.87 – 2.82 (m, 2H), 2.70 (dd, *J* = 13.3, 8.1 Hz, 2H), 1.93 – 1.88 (m, 2H), 1.78 (p, *J* = 6.0 Hz, 2H), 1.65 – 1.61 (m, 2H). <sup>13</sup>C NMR (151 MHz, Chloroform-*d*) δ 214.2, 162.1, 160.5, 131.5, 131.4, 128.1, 128.1, 126.6, 126.5, 124.1, 124.1, 115.4, 115.3, 49.7, 32.4, 29.7, 20.5. HRMS (ESI) *m/z*: [M + H]<sup>+</sup> Calcd for C<sub>20</sub>H<sub>21</sub>F<sub>2</sub>O 315.1555; Found 315.1554.

#### 2,6-Bis(3,4-dichlorobenzyl)cyclohexan-1-one (**4h**)

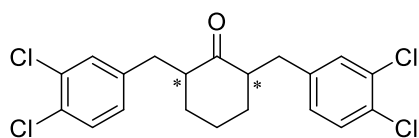

Purification by flash column chromatography (silica gel, PE:EA = 10:1) afforded the product as colorless oil; 50.7 mg, yield: 98%; *trans:cis* >20:1; >99% ee;  $[\alpha]_D^{25} = +$

45.4 (c = 1.0, CH<sub>2</sub>Cl<sub>2</sub>); HPLC (Lux 5u Amylose-2, *i*-propanol/*n*-hexane = 10/90, flow rate = 1.0 mL/min, *l* = 210 nm) *t<sub>R</sub>* = 8.0 min (major), 9.4 min (minor); *trans*-**4h**: <sup>1</sup>H NMR (400 MHz, Chloroform-*d*) δ 7.30 (d, *J* = 8.2 Hz, 2H), 7.20 (d, *J* = 2.1 Hz, 2H), 6.92 (dd, *J* = 8.2, 2.1 Hz, 2H), 3.01 (dd, *J* = 13.8, 6.6 Hz, 2H), 2.74 – 2.67 (m, 2H), 2.56 (dd, *J* = 13.8, 8.0 Hz, 2H), 1.94 – 1.87 (m, 2H), 1.77 (p, *J* = 5.9 Hz, 2H), 1.65 – 1.56 (m, 2H). <sup>13</sup>C NMR (101 MHz, Chloroform-*d*) δ 213.4, 139.7, 132.4, 130.9, 130.4, 128.5, 50.5, 35.4, 32.0, 20.4. HRMS (ESI) *m/z*: [M + H]<sup>+</sup> Calcd for C<sub>20</sub>H<sub>19</sub>Cl<sub>4</sub>O 415.0185; Found 415.0183.

#### 2,6-Bis(furan-2-ylmethyl)cyclohexan-1-one (**4i**)

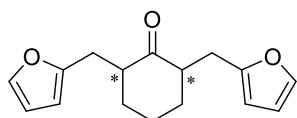

Purification by flash column chromatography (silica gel, PE:EA = 10:1) afforded the product as colorless oil; 31.0 mg, yield: 96%; *trans:cis* = 5:1; 98% ee;  $[\alpha]_D^{25} = +32.2$  (c = 1.0, CH<sub>2</sub>Cl<sub>2</sub>); HPLC (Lux 5u

Cellulose-2, *i*-propanol/*n*-hexane = 20/80, flow rate = 1.0 mL/min, *l* = 210 nm) *t<sub>R</sub>* = 4.8 min (minor), 5.3 min (major); *trans*-**4i**: <sup>1</sup>H NMR (400 MHz, Chloroform-*d*) δ 7.29 (dd, *J* = 1.9, 0.8 Hz, 2H), 6.26 (dd, *J* = 3.2, 1.9 Hz, 2H), 6.00 (dd, *J* = 3.2, 0.9 Hz, 2H), 3.09 (dd, *J* = 14.6, 5.9 Hz, 2H), 2.91 – 2.84



(m, 2H), 2.70 (dd,  $J = 15.1, 8.3$  Hz, 2H), 1.99 – 1.91 (m, 2H), 1.80 – 1.74 (m, 2H), 1.66 – 1.58 (m, 2H).  $^{13}\text{C}$  NMR (101 MHz, Chloroform- $d$ )  $\delta$  213.8, 153.4, 141.4, 110.3, 106.6, 48.0, 32.4, 288, 20.3.

The analytical data are consistent with the literature.<sup>18</sup>

(3*S*,4*S*)-3-Benzylchroman-4-ol (**5**)

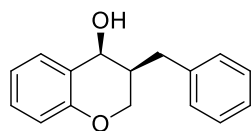

Purification by flash column chromatography (silica gel, PE:EA = 10:1)

afforded the product as white solid; 115 mg, yield: 96%; dr = 7:1; 94% ee;

$[\alpha]_{\text{D}}^{25} = -94.8$  ( $c = 1.0, \text{CH}_2\text{Cl}_2$ ); HPLC (Lux 5u Cellulose-1, *i*-propanol/*n*-

hexane = 10/90, flow rate = 1.0 mL/min,  $l = 210$  nm)  $t_{\text{R}} = 7.0$  min (major), 8.0 min (minor);  $^1\text{H}$

NMR (400 MHz, Chloroform- $d$ )  $\delta$  7.35 – 7.19 (m, 7H), 6.91 – 6.83 (m, 2H), 4.51 (t,  $J = 3.7$  Hz,

1H), 4.09 (d,  $J = 8.9$  Hz, 2H), 2.89 (dd,  $J = 13.6, 8.4$  Hz, 1H), 2.68 (dd,  $J = 13.7, 7.3$  Hz, 1H), 2.37

– 2.28 (m, 1H), 1.65 (dd,  $J = 51.5, 10.3$  Hz, 1H).  $^{13}\text{C}$  NMR (101 MHz, Chloroform- $d$ )  $\delta$  154.4, 139.3,

130.3, 130.1, 129.2, 128.7, 126.4, 124.3, 120.6, 117.0, 65.1, 65.0, 40.1, 32.9. The analytical data are

consistent with the literature.<sup>1a</sup>

(*R,E*)-3-benzylchroman-4-one oxime (**6**)

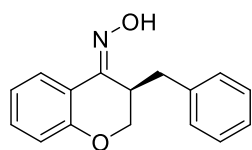

Purification by flash column chromatography (silica gel, PE:EA = 10:1)

afforded the product as white solid; 105 mg, yield: 94%; 92% ee;  $[\alpha]_{\text{D}}^{25} =$

$+60.8$  ( $c = 1.0, \text{CH}_2\text{Cl}_2$ ); HPLC (Lux 5u Cellulose-1, *i*-propanol/*n*-hexane

= 10/90, flow rate = 1.0 mL/min,  $l = 210$  nm)  $t_{\text{R}} = 5.2$  min (minor), 6.3 min (major); MP: 80–83 °C.

$^1\text{H}$  NMR (600 MHz, Chloroform- $d$ )  $\delta$  8.17 (d,  $J = 107.9$  Hz, 1H), 7.87 (dd,  $J = 7.9, 1.7$  Hz, 1H),

7.35 – 7.30 (m, 5H), 7.28 – 7.24 (m, 1H), 7.01 – 6.95 (m, 2H), 4.15 – 4.12 (m, 1H), 3.95 – 3.92 (m,

1H), 3.65 – 3.62 (m, 1H), 3.05 – 3.02 (m, 1H), 2.79 – 2.74 (m, 1H).  $^{13}\text{C}$  NMR (151 MHz,

Chloroform- $d$ )  $\delta$  156.3, 153.3, 139.1, 131.4, 129.6, 128.6, 126.6, 124.5, 121.6, 117.9, 117.2, 66.3,

34.8, 33.3. HRMS (ESI)  $m/z$ :  $[\text{M} + \text{H}]^+$  Calcd for  $\text{C}_{16}\text{H}_{16}\text{NO}_2$  254.1176; Found 254.1174.

## 6. References

- (1) (a) R. Molina Betancourt, P. Phansavath and V. Ratovelomanana-Vidal, Rhodium-Catalyzed Asymmetric Transfer Hydrogenation/Dynamic Kinetic Resolution of 3-Benzylidene-Chromanones, *Org. Lett.*, 2021, **23**, 1621–1625; (b) W. Li, T. Yang, N. Song, R. Li, J. Long, L. He, X. Zhang and H. Lv, Ir/ $\beta$ -Ampho Complex Catalyzed Asymmetric Sequential Hydrogenation of Enones: A General Access to Chiral Alcohols with Two Contiguous Chiral Centers, *Chem. Sci.*, 2022, **13**, 1808–1814.

- (2) S.-M. Lu and C. Bolm, Highly Enantioselective Synthesis of Optically Active Ketones by Iridium-Catalyzed Asymmetric Hydrogenation, *Angew. Chem. Int. Ed.*, 2008, **47**, 8920–8923.
- (3) T. Ishimaru, N. Shibata, T. Horikawa, N. Yasuda, S. Nakamura, T. Toru and M. Shiro, Cinchona Alkaloid Catalyzed Enantioselective Fluorination of Allyl Silanes, Silyl Enol Ethers, and Oxindoles, *Angew. Chem. Int. Ed.*, 2008, **47**, 4157–4161.
- (4) (a) H. Moorthy, Yadav, M. Yadav, N. Tamang, S. K. Mavileti, L. Singla, A. R. Choudhury, D. Sahal and N. R. Golakoti, Antiplasmodial and Antimalarial Activity of 3,5-Diarylidene-tetrahydro-2H-pyran-4(3H)-ones via Inhibition of Plasmodium falciparum Pyridoxal Synthase, *ChemMedChem*, 2023, **18**, e202200411; (b) Z. Zheng, Y. Cao, Q. Chong, Z. Han, J. Ding, C. Luo, Z. Wang, D. Zhu, Q.-L. Zhou and K. Ding, Chiral Cyclohexyl-Fused Spirobiindanes: Practical Synthesis, Ligand Development, and Asymmetric Catalysis, *J. Am. Chem. Soc.*, 2018, **140**, 10374–10381.
- (5) W.-F. Wang, J.-B. Peng, X. Qi, J. Ying and X.-F. Wu, A Convenient Palladium-Catalyzed Carbonylative Synthesis of (*E*)-3-Benzylidenechroman-4-ones, *Chem. Eur. J.*, 2019, **25**, 3521–3524.
- (6) X.-M. Cheng, Z.-T. Huang and Q.-Y. Zheng, Topochemical Photodimerization of (*E*)-3-Benzylidene-4-chromanone Derivatives from  $\beta$ -Type Structures Directed by Halogen Groups, *Tetrahedron*, 2011, **67**, 9093–9098.
- (7) A. T. Biju, N. E. Wurz and F. Glorius, N-Heterocyclic Carbene-Catalyzed Cascade Reaction Involving the Hydroacylation of Unactivated Alkynes, *J. Am. Chem. Soc.*, 2010, **132**, 5970–5971.
- (8) G. Lotfy, Y. M. Abdel Aziz, M. M. Said, E. S. H. El Ashry, E. S. H. El Tamany, A. Barakat, H. A. Ghabbour, S. Yousuf, Z. Ul-Haq and M. I. Choudhary, Synthesis of Oxindole Analogues, Biological Activity, and In Silico Studies, *ChemistrySelect*, 2019, **4**, 10510–10516.
- (9) G. Liang, L. Shao, Y. Wang, C. Zhao, Y. Chu, J. Xiao, Y. Zhao, X. Li and S. Yang, Exploration and Synthesis of Curcumin Analogues with Improved Structural Stability Both in Vitro and in Vivo as Cytotoxic Agents, *Bioorg. Med. Chem.*, 2009, **17**, 2623–2631.
- (10) P. Gupta, P. Garg and N. Roy, Comparative Docking and CoMFA Analysis of Curcumin Derivatives as HIV-1 Integrase Inhibitors, *Mol Divers*, 2011, **15**, 733–750.
- (11) J. Chen, W. Meng, X. Feng and H. Du, Asymmetric Hydrogenation by Relay Catalysis with

- FLPs and CPAs: Stereodivergent Synthesis of 3-Substituted Flavanones, *J. Org. Chem.*, 2022, **87**, 10544–10549.
- (12) Y. Hoshino, H. Tanaka and N. Takeno, Regioselective Reduction of the Homoisoflavone System with Dialkylboranes in the Presence of Palladium Catalysts, *Bull. Chem. Soc. Jpn.*, 1998, **71**, 2923–2928.
- (13) B. S. Kirkiacharian, M. Gomis, H. G. Tongo, J. Mahuteau and J. D. Brion, The <sup>13</sup>C NMR Spectra of Homoisoflavonoids, *Organic Magnetic Resonance*, 1984, **22**, 106–108.
- (14) L. Simon, A. A. Abdul Salam, S. Madan Kumar, T. Shilpa, K. K. Srinivasan and K. Byrappa, Synthesis, Anticancer, Structural, and Computational Docking Studies of 3-Benzylchroman-4-one Derivatives, *Bioorganic & Medicinal Chemistry Letters*, 2017, **27**, 5284–5290.
- (15) M. Gomis and B. S. Kirkiacharian, Hydride Reduction and Hydroboration Study of the Stereoselectivity of a New Approach to 3-(Arylmethyl)-4-chromanols (homoisoflavanols), *Tetrahedron*, 1990, **46**, 1849.
- (16) D. Xiong, S. Yi, X. Yang, X. Long, T. Xu, Z. Xiao, L. Chen and B. Li, Method for Preparing Chiral Dihydroisoflavone Compound by Hydrogenation Reduction, and Product Thereof, CN111574487A, 2020.
- (17) X. Li, X. Shao, X. Zhang, Q. Zhao, H. Lai, B. Cui, Z. Shao and M. Zhao, Synthesizing Carbonyl Furan Derivatives by A Dehydrogenative Coupling Reaction, *Org. Biomol. Chem.*, 2022, **20**, 6542–6546.
- (18) K. Bano, A. Jain, R. Sarkar and T. K. Panda, Economically Viable and Efficient Catalysts for Esterification and Cross Aldol Condensation Reactions under Mild Conditions, *ChemistrySelect*, 2020, **5**, 4470–4477.
- (19) T. Morack, C. Onneken, H. Nakakohara, C. Mück-Lichtenfeld and R. Gilmour, Enantiodivergent Prenylation via Deconjugative Isomerization, *ACS Catal.*, 2021, **11**, 11929–11937.
- (20) J. Chen, B. Gao, X. Feng, W. Meng and H. Du, Relay Catalysis by Achiral Borane and Chiral Phosphoric Acid in the Metal-Free Asymmetric Hydrogenation of Chromones, *Org. Lett.*, 2021, **23**, 8565–8569.

## 7. NMR, SFC and HPLC spectra

### (*E*)-3-Benzylidenechroman-4-one (**1a**)

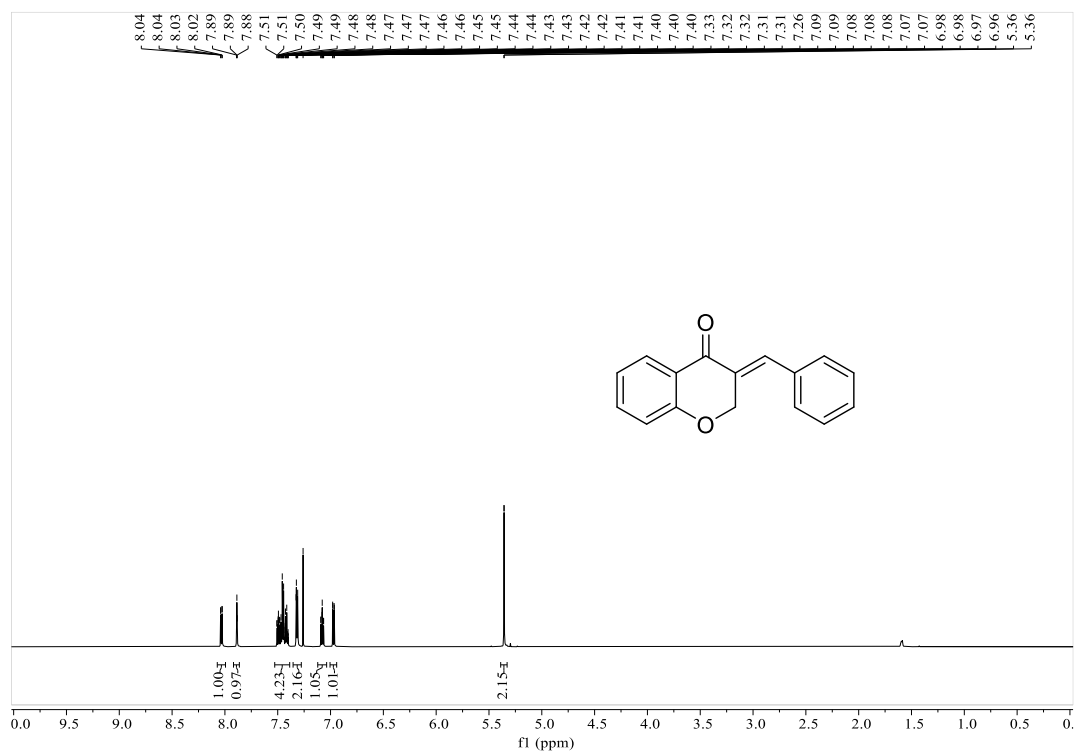

<sup>1</sup>H NMR (600 MHz, Chloroform-*d*)

### (*E*)-3-(3-Methylbenzylidene)chroman-4-one (**1b**)

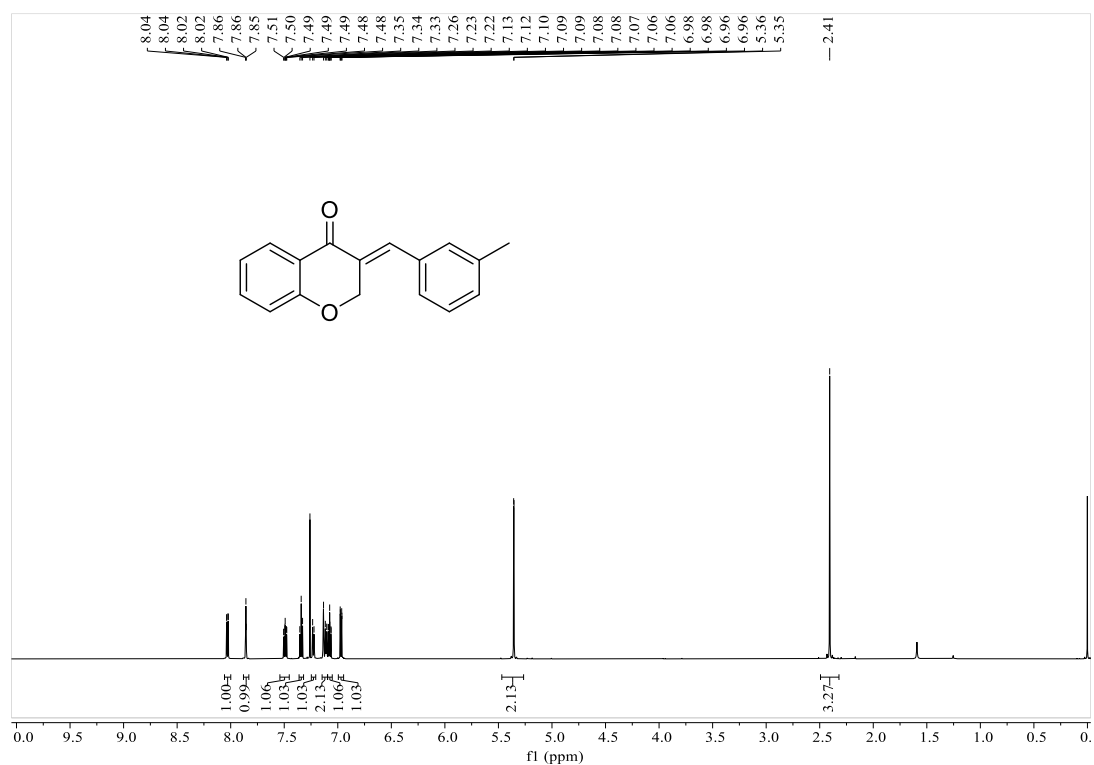

<sup>1</sup>H NMR (600 MHz, Chloroform-*d*)



*(E)*-3-(4-Methylbenzylidene)chroman-4-one (**1e**)

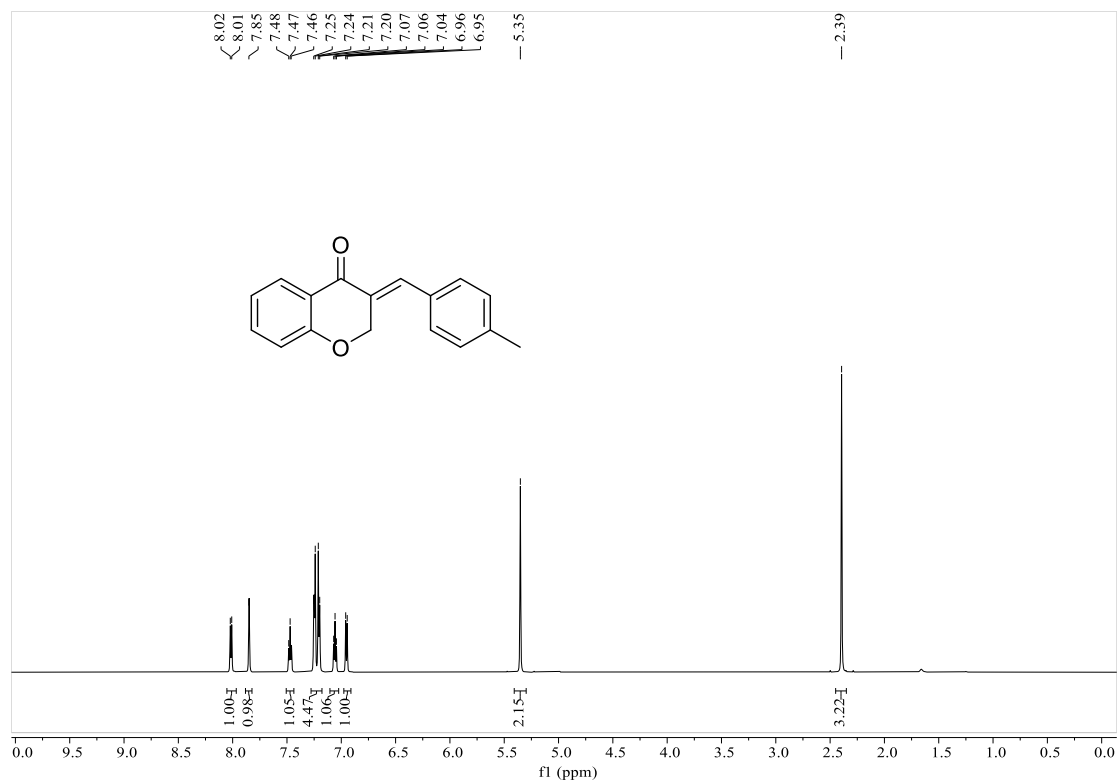

<sup>1</sup>H NMR (600 MHz, Chloroform-*d*)

*(E)*-3-(4-Methoxybenzylidene)chroman-4-one (**1f**)

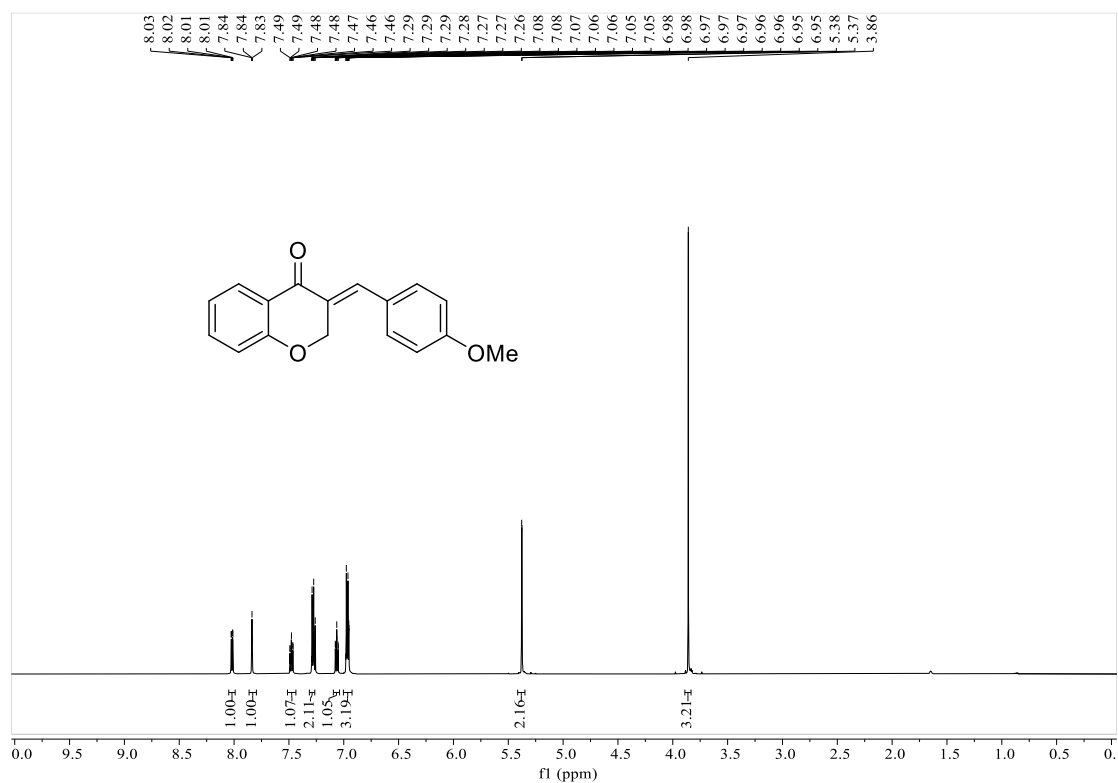

<sup>1</sup>H NMR (600 MHz, Chloroform-*d*)

*(E)*-3-(4-Chlorobenzylidene)chroman-4-one (**1g**)

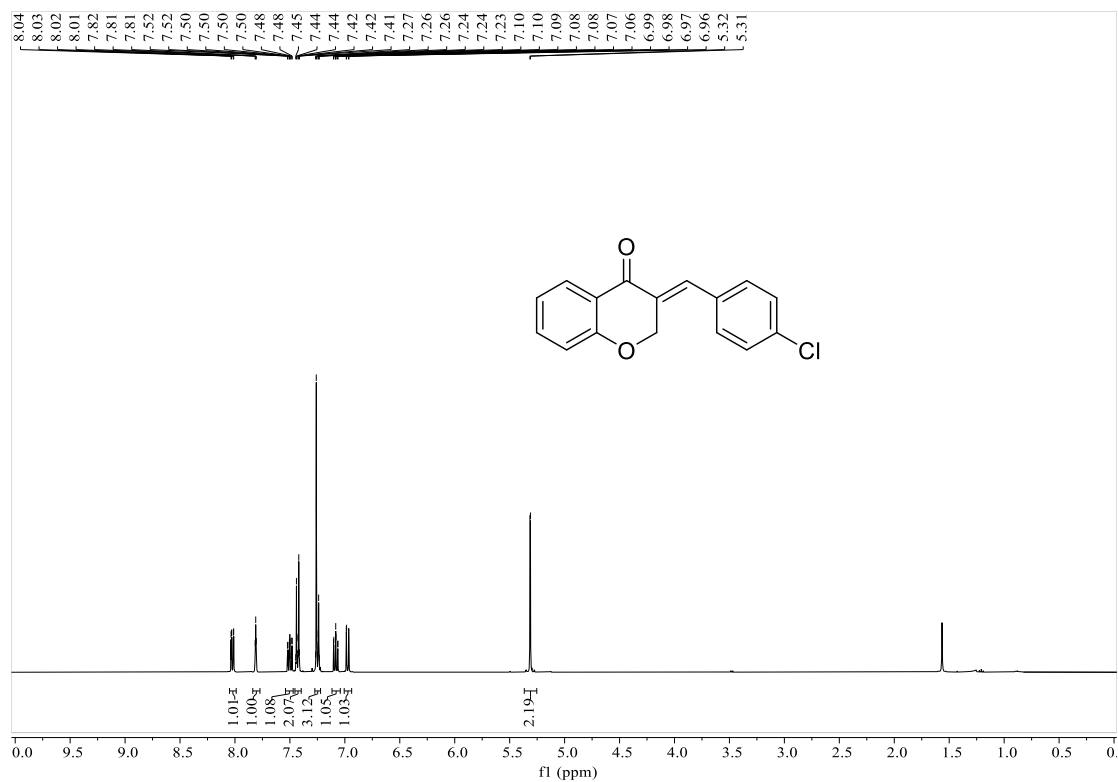

<sup>1</sup>H NMR (400 MHz, Chloroform-*d*)

*(E)*-3-(2-Methylbenzylidene)chroman-4-one (**1h**)

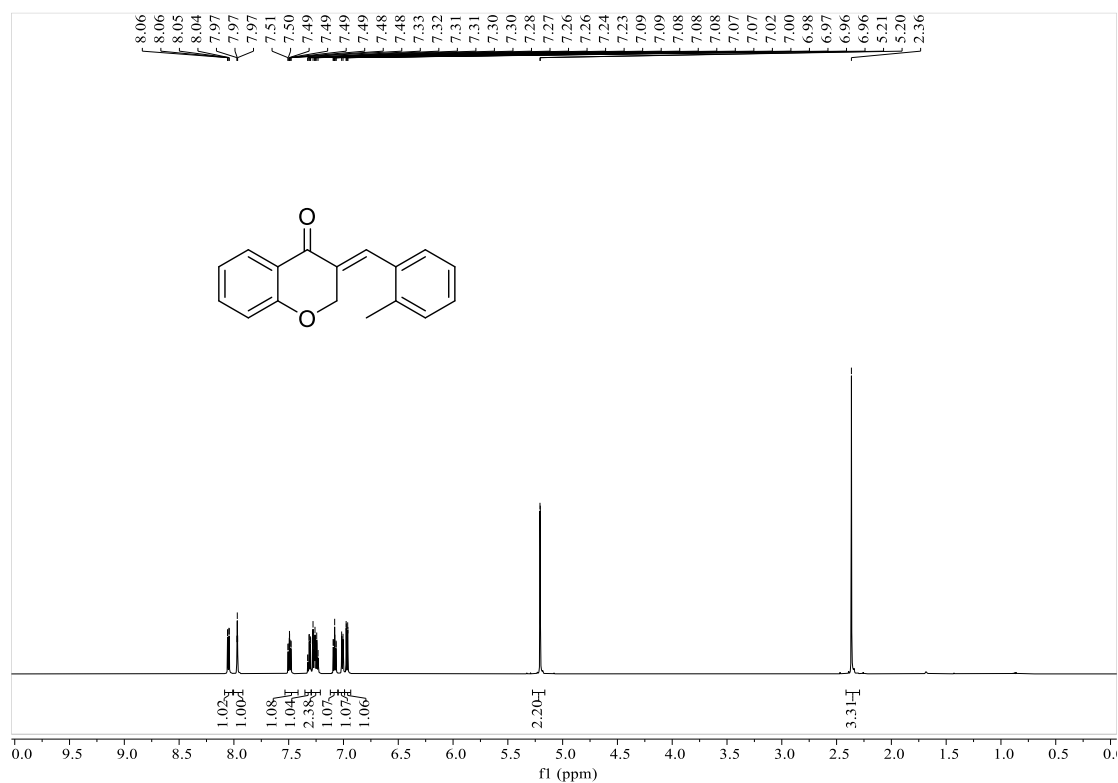

<sup>1</sup>H NMR (600 MHz, Chloroform-*d*)

*(E)*-3-(2-Methoxybenzylidene)chroman-4-one (**1i**)

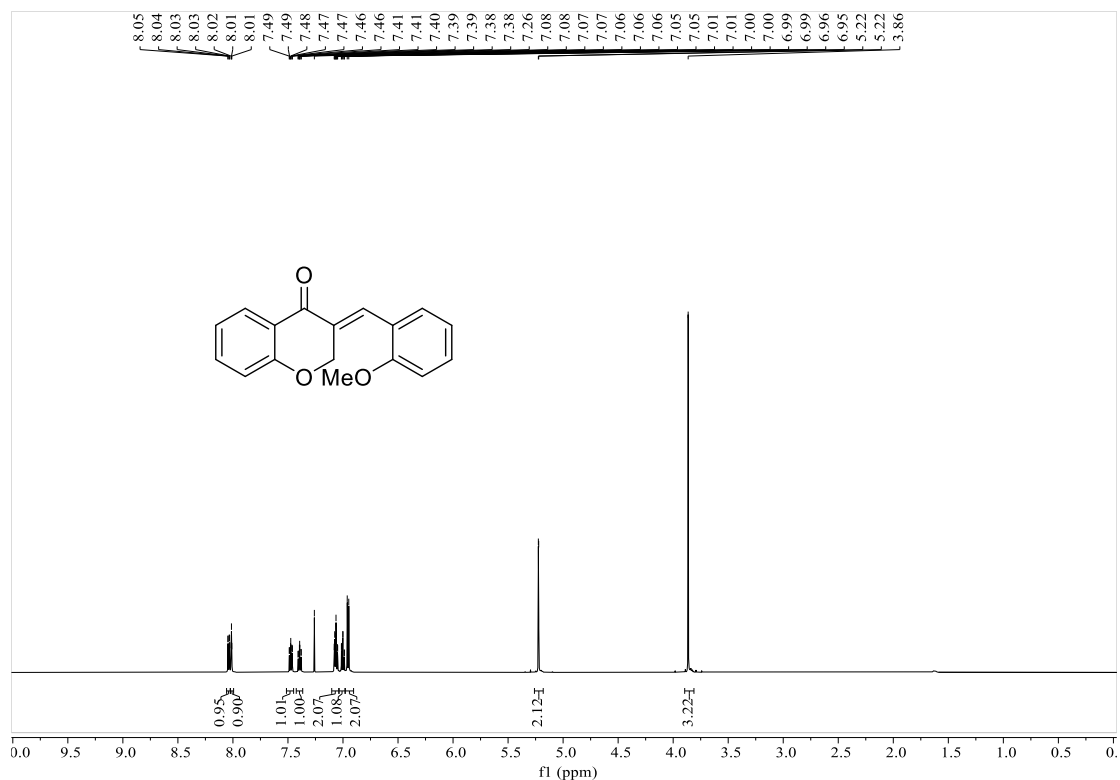

<sup>1</sup>H NMR (600 MHz, Chloroform-*d*)

*(E)*-3-(2-Bromobenzylidene)chroman-4-one (**1j**)

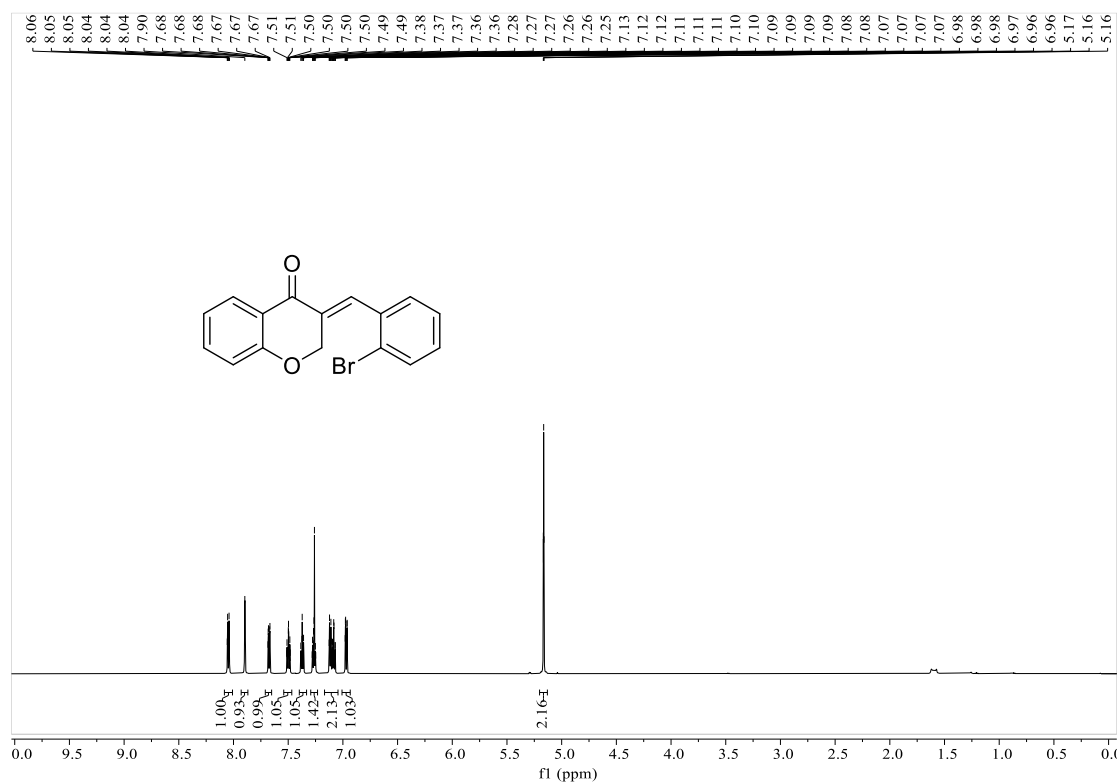

<sup>1</sup>H NMR (600 MHz, Chloroform-*d*)



*(E)*-3-(2-Fluorobenzylidene)chroman-4-one (**1k**)

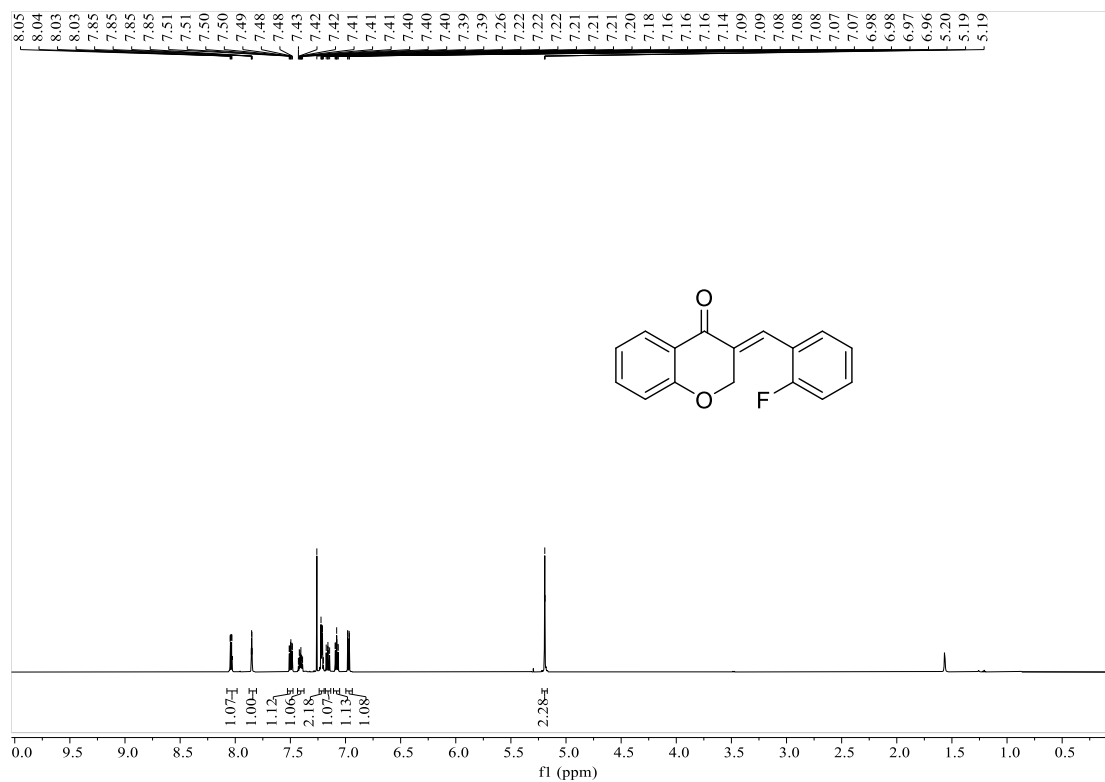

<sup>1</sup>H NMR (600 MHz, Chloroform-*d*)

*(E)*-3-(Furan-2-ylmethylene)chroman-4-one (**1l**)

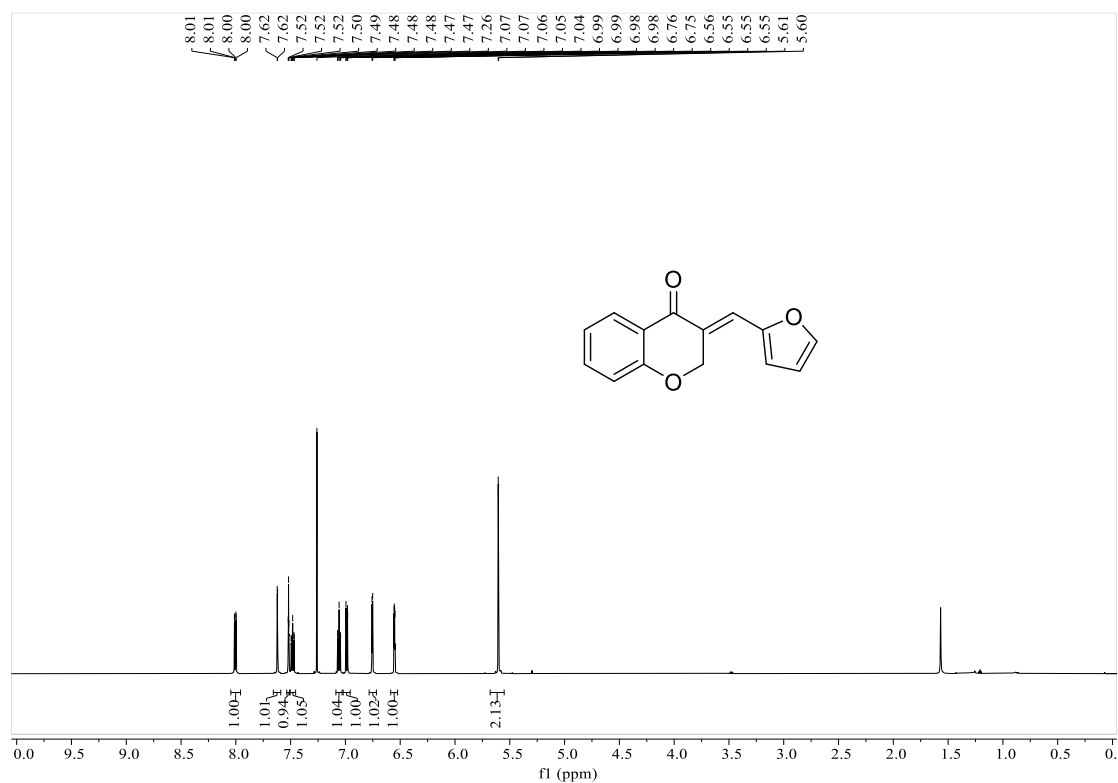

<sup>1</sup>H NMR (600 MHz, Chloroform-*d*)

*(E)*-3-(Naphthalen-2-ylmethylene)chroman-4-one (**1m**)

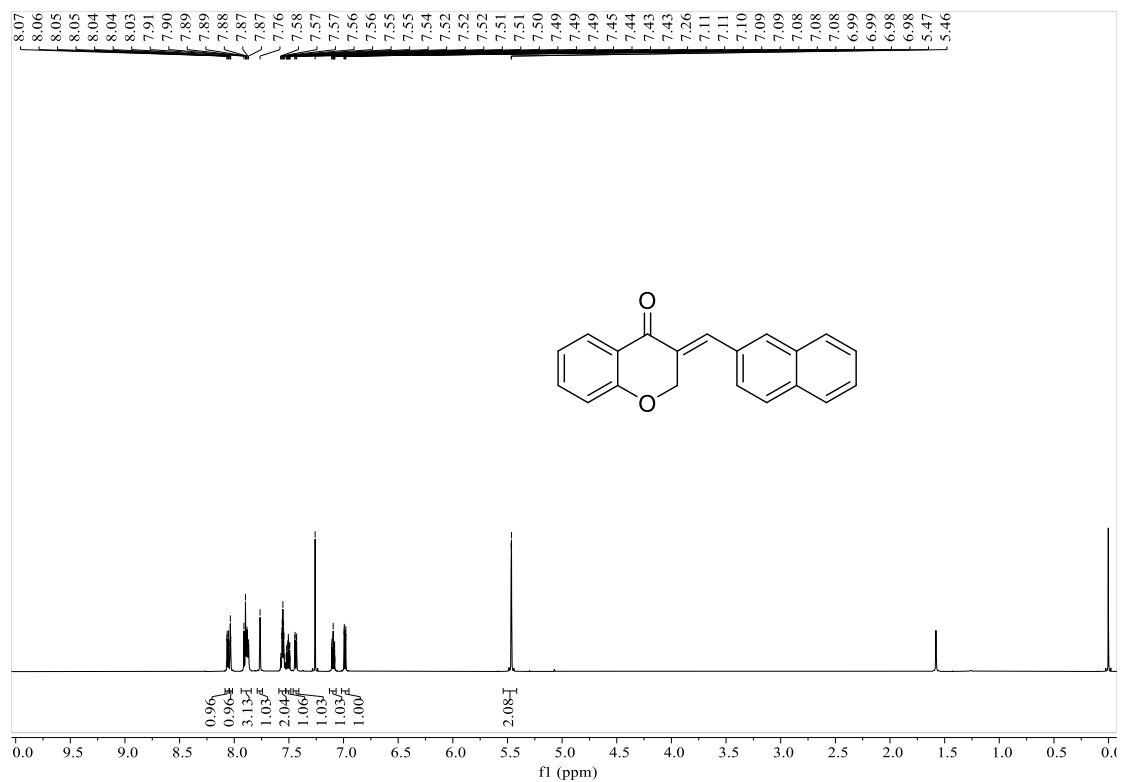

<sup>1</sup>H NMR (600 MHz, Chloroform-*d*)

*(E)*-3-(Naphthalen-1-ylmethylene)chroman-4-one (**1n**)

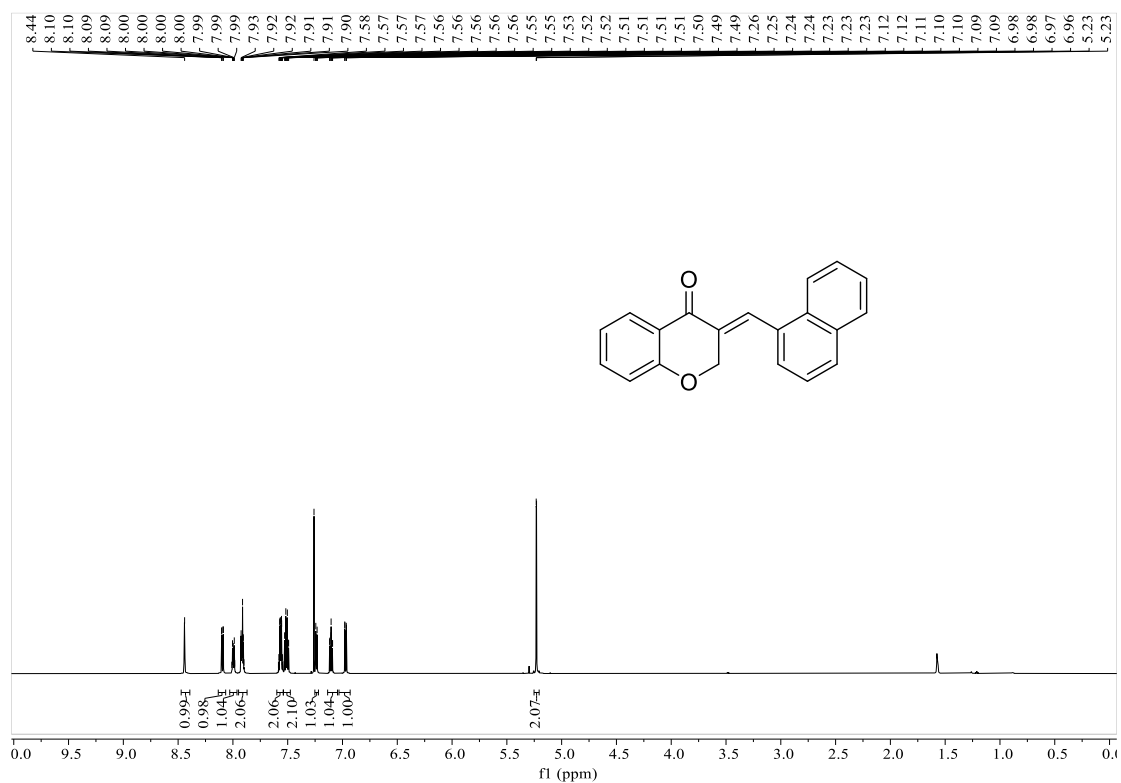

<sup>1</sup>H NMR (600 MHz, Chloroform-*d*)

*(E)*-3-(2-methylpropylidene)chroman-4-one (**1o**)

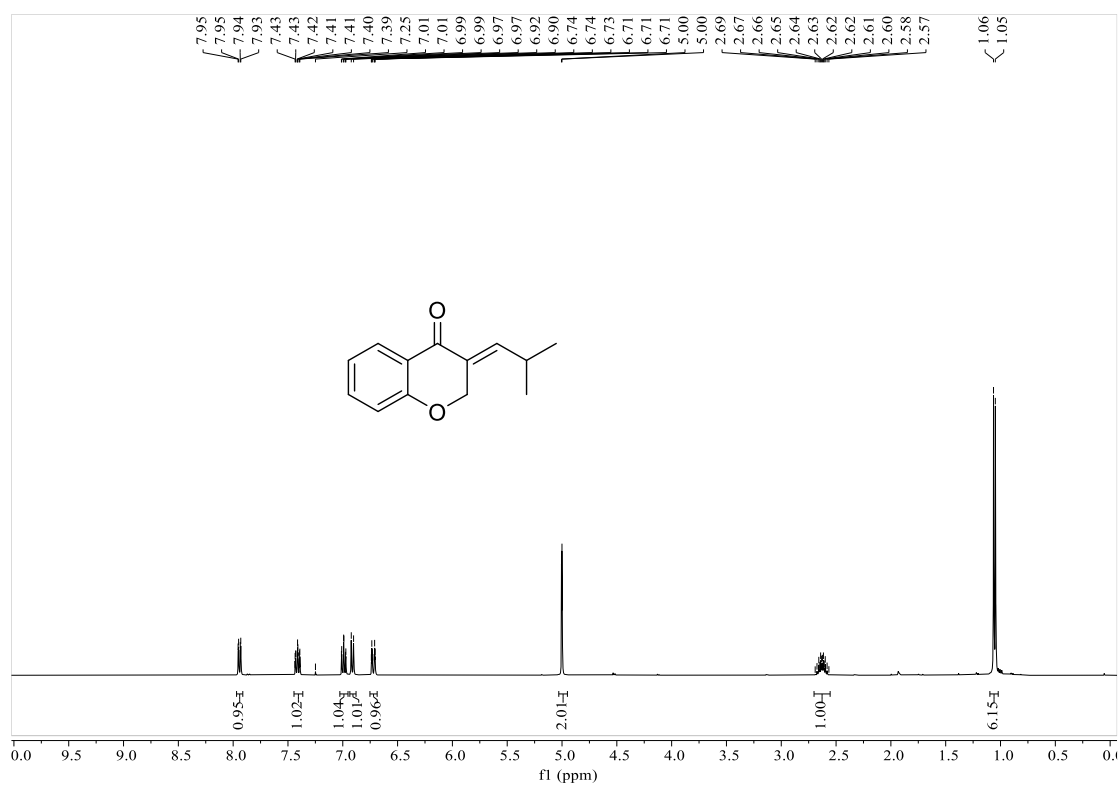

<sup>1</sup>H NMR (400 MHz, Chloroform-*d*)

*(E)*-3-Benzylidene-6-methylchroman-4-one (**1p**)

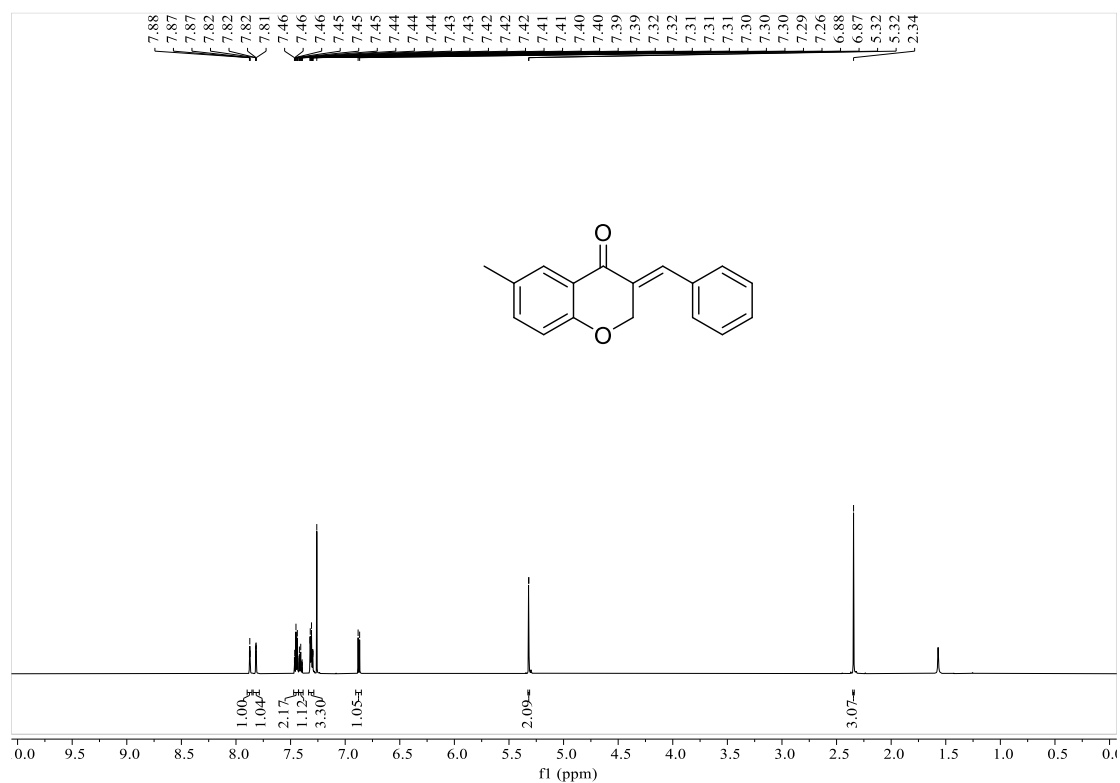

<sup>1</sup>H NMR (600 MHz, Chloroform-*d*)

*(E)*-2-Benzylidene-3,4-dihydronaphthalen-1(2*H*)-one (**1q**)

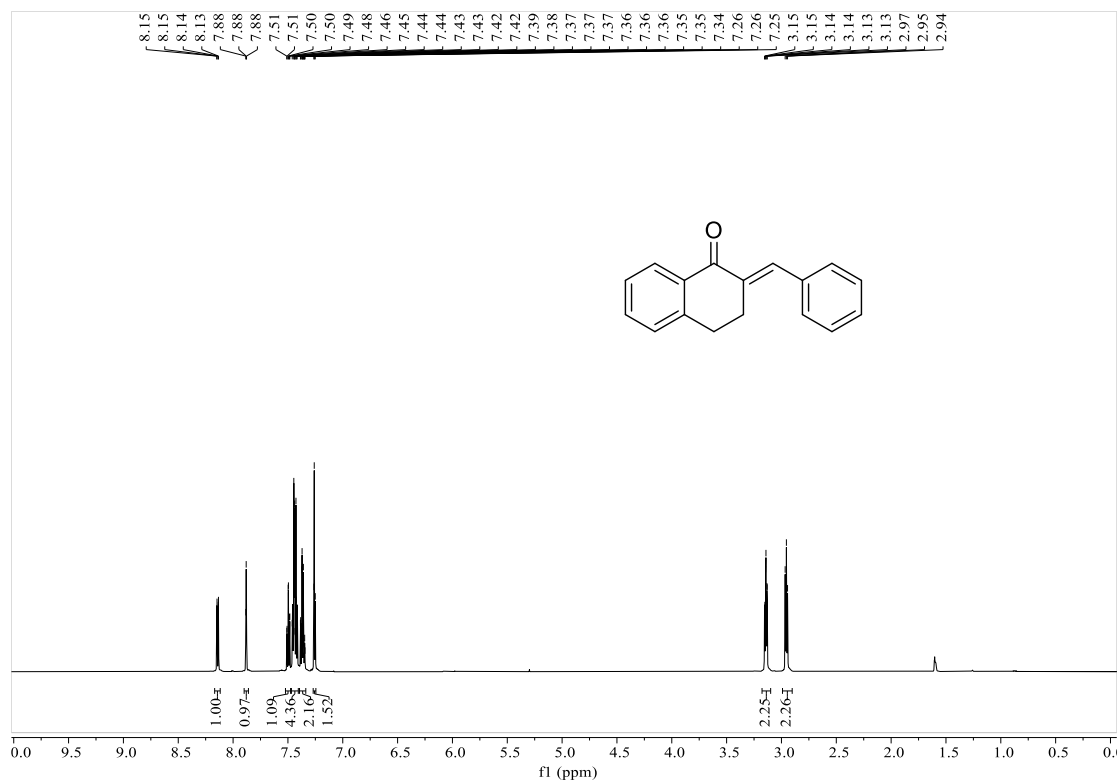

<sup>1</sup>H NMR (600 MHz, Chloroform-*d*)

*(E)*-2-Benzylidencyclohexan-1-one (**1r**)

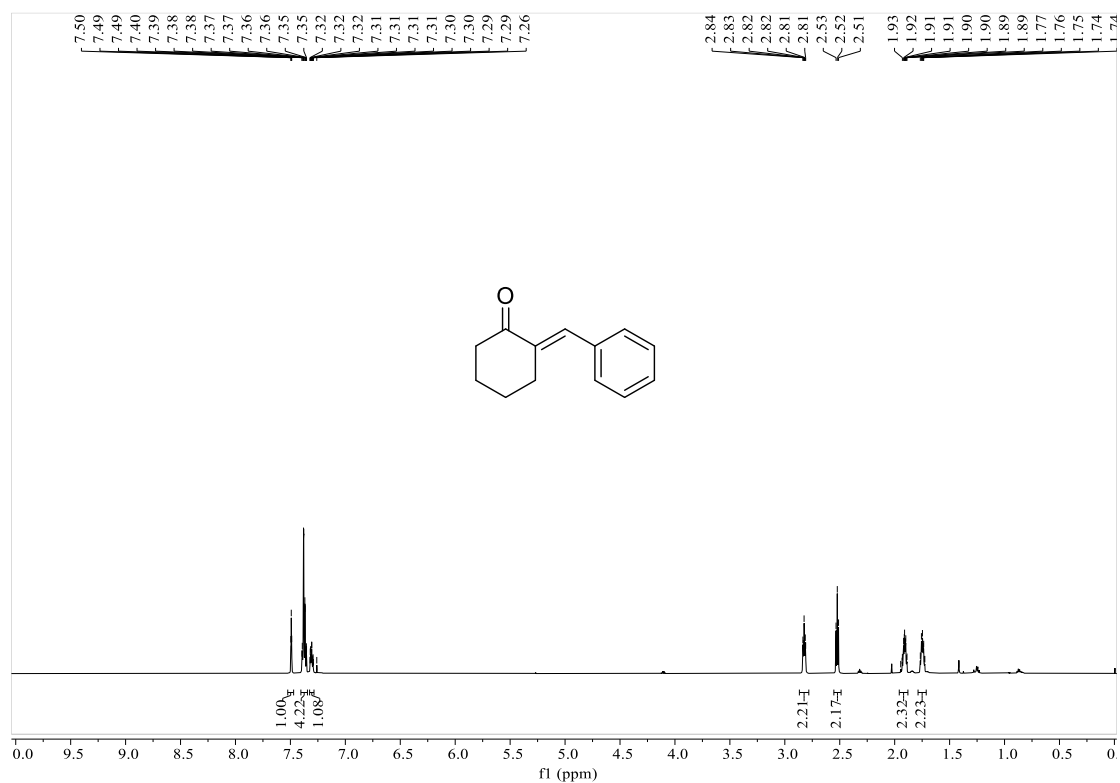

<sup>1</sup>H NMR (600 MHz, Chloroform-*d*)

**(E)-2-Benzylidene-2,3-dihydro-1H-inden-1-one (1s)**

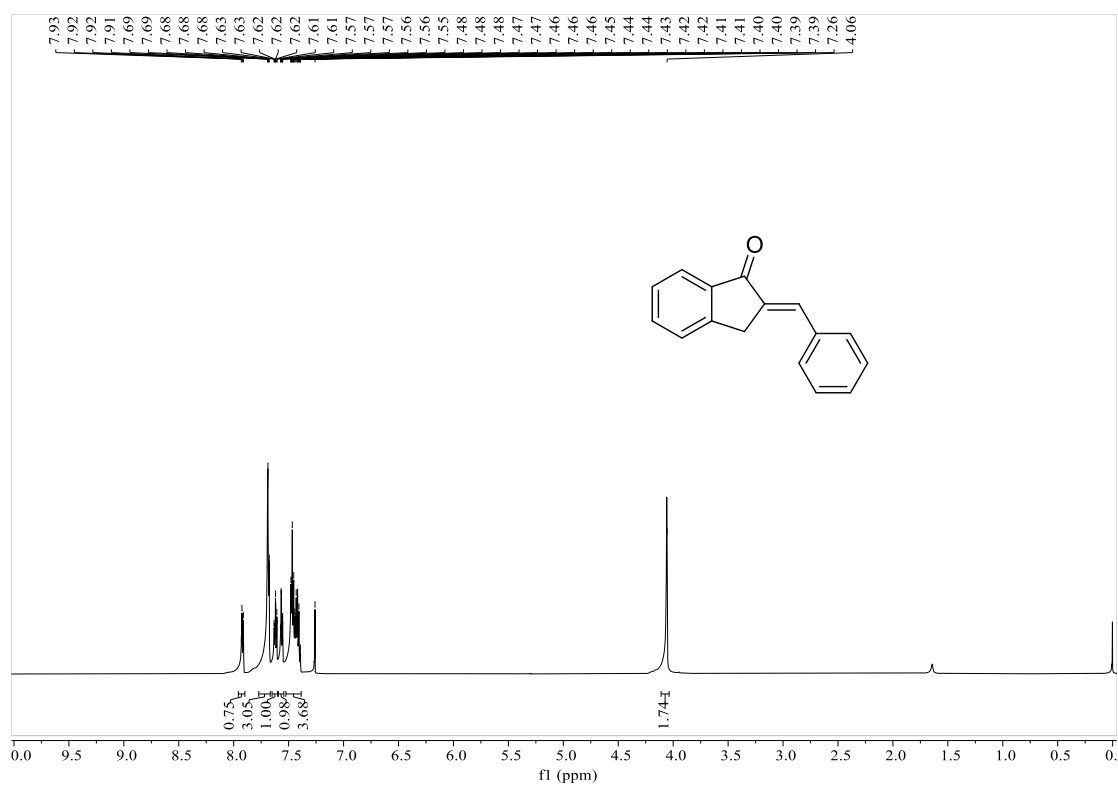

<sup>1</sup>H NMR (600 MHz, Chloroform-d)

**(E)-2-Benzylidenecyclopentan-1-one (1t)**

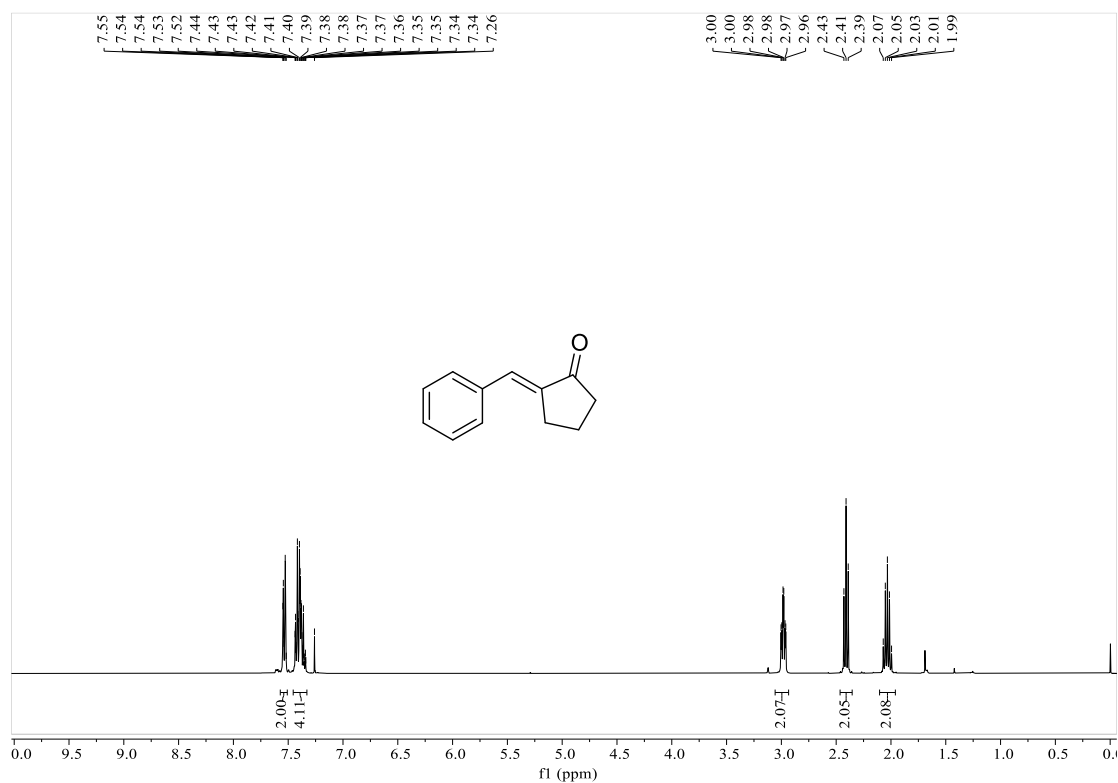

<sup>1</sup>H NMR (400 MHz, Chloroform-d)

*(E)*-2-Methyl-1,3-diphenylprop-2-en-1-one (**1u**)

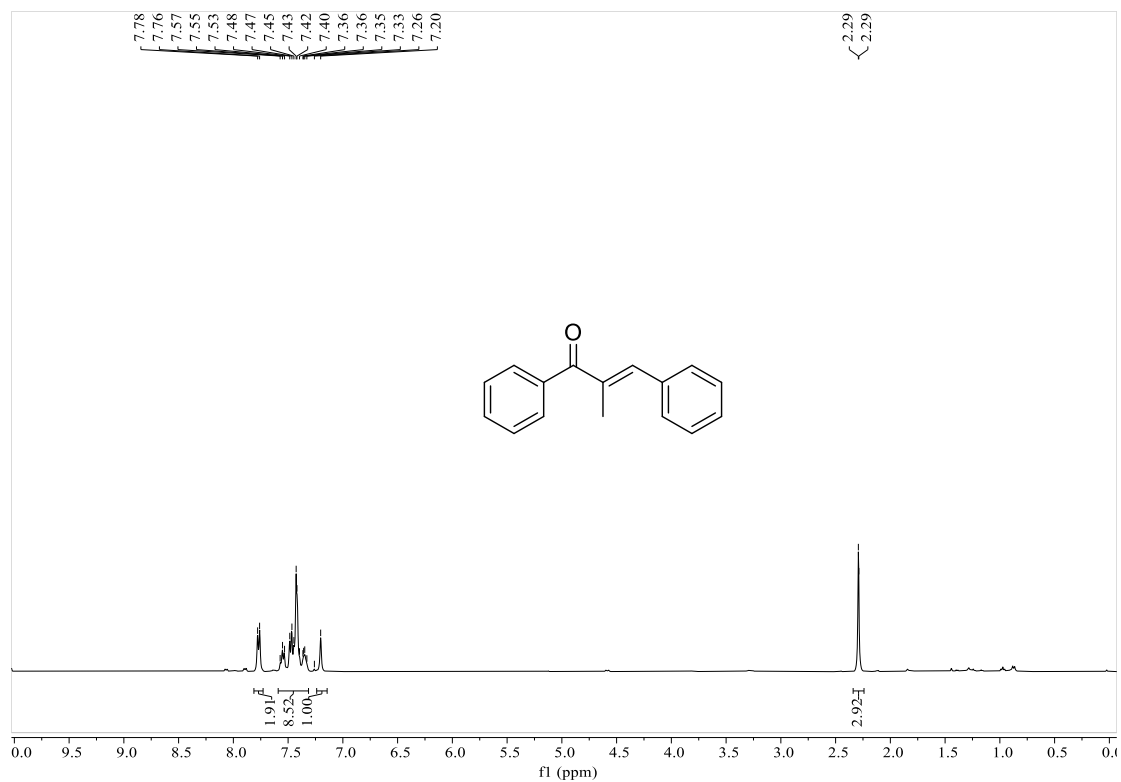

<sup>1</sup>H NMR (400 MHz, Chloroform-*d*)

3-Benzyl-4*H*-chromen-4-one (**2a'**)

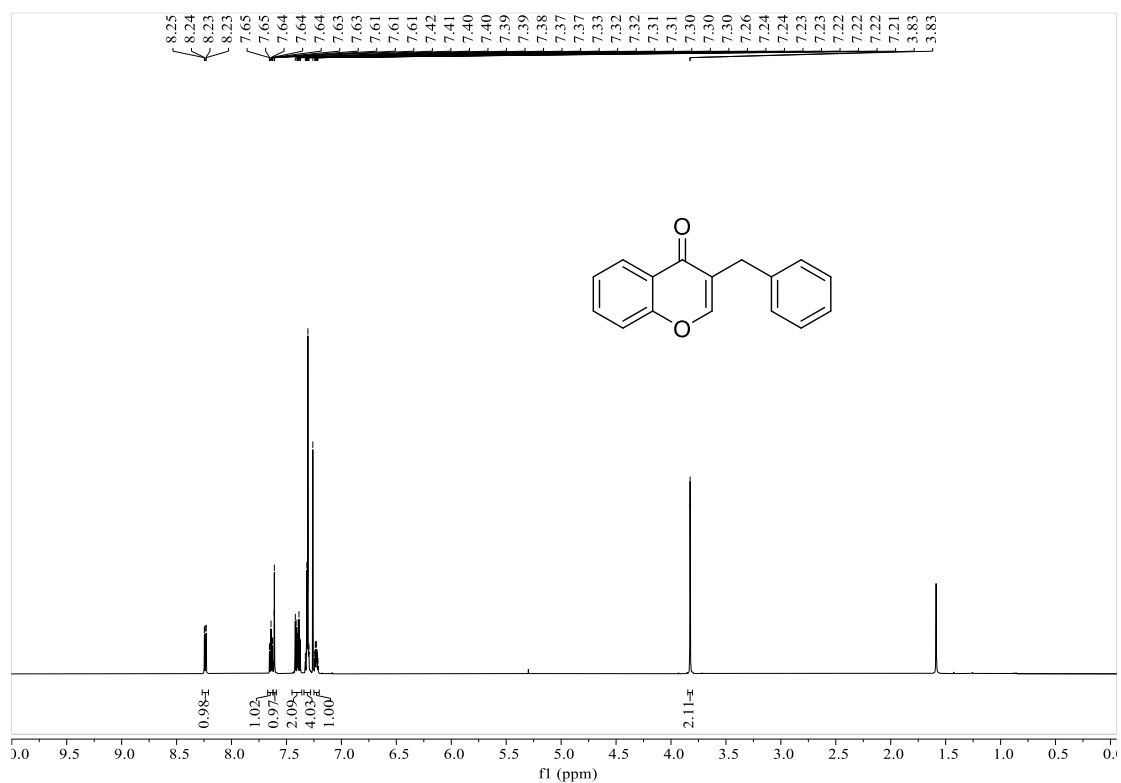

<sup>1</sup>H NMR (600 MHz, Chloroform-*d*)

3,5-di(*E*)-benzylidene)tetrahydro-4*H*-pyran-4-one (**3a**)

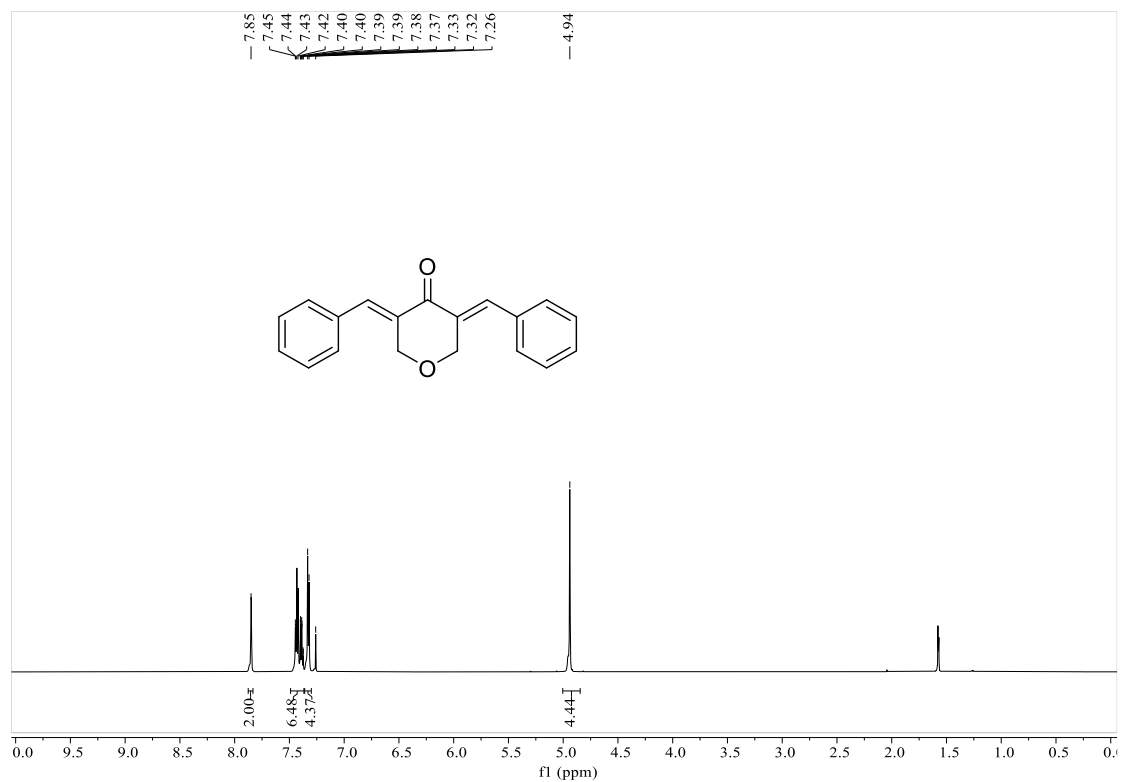

<sup>1</sup>H NMR (600 MHz, Chloroform-*d*)

3,5-bis(*E*)-4-methylbenzylidene)tetrahydro-4*H*-pyran-4-one (**3b**)

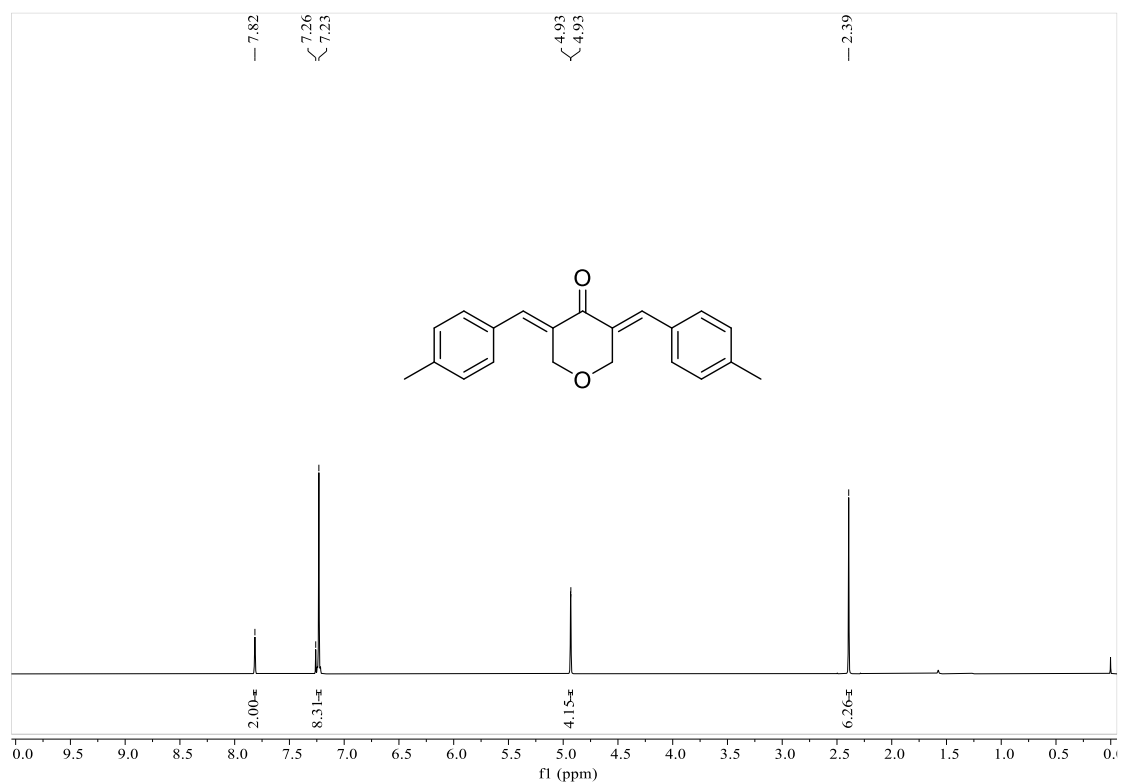

<sup>1</sup>H NMR (600 MHz, Chloroform-*d*)

2,6-Di(*E*)-benzylidene)cyclohexan-1-one (**3c**)

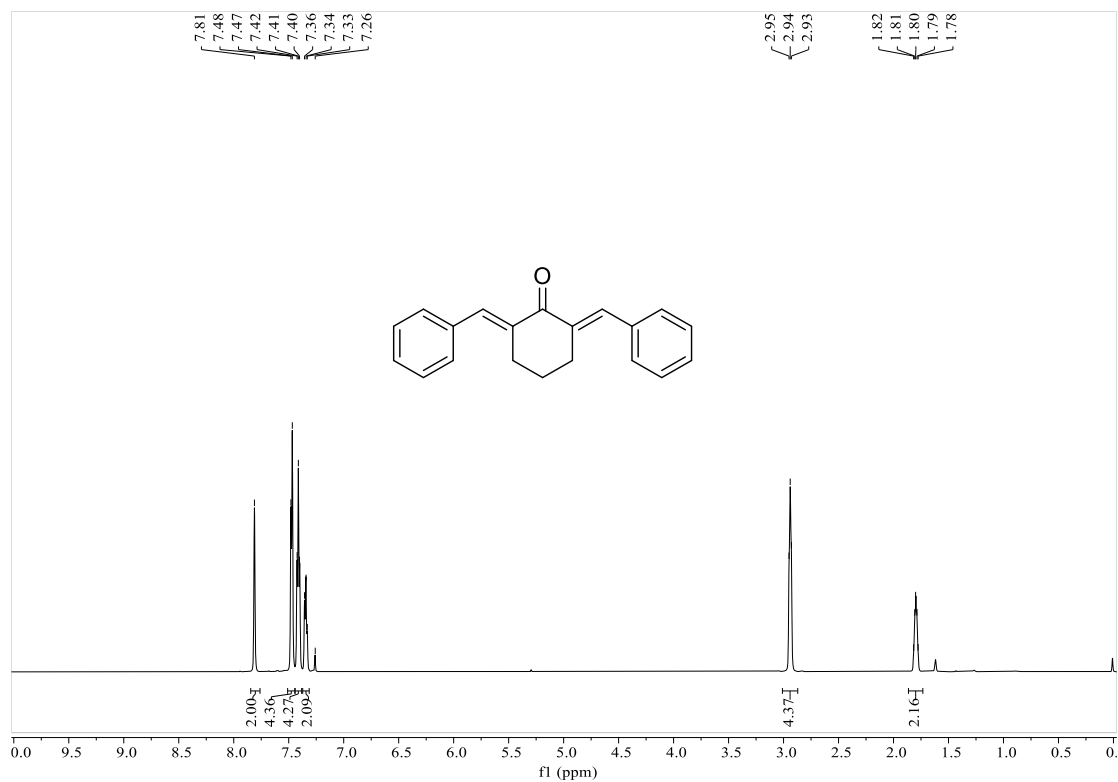

<sup>1</sup>H NMR (600 MHz, Chloroform-*d*)

2,6-Bis(*E*)-3-methylbenzylidene)cyclohexan-1-one (**3d**)

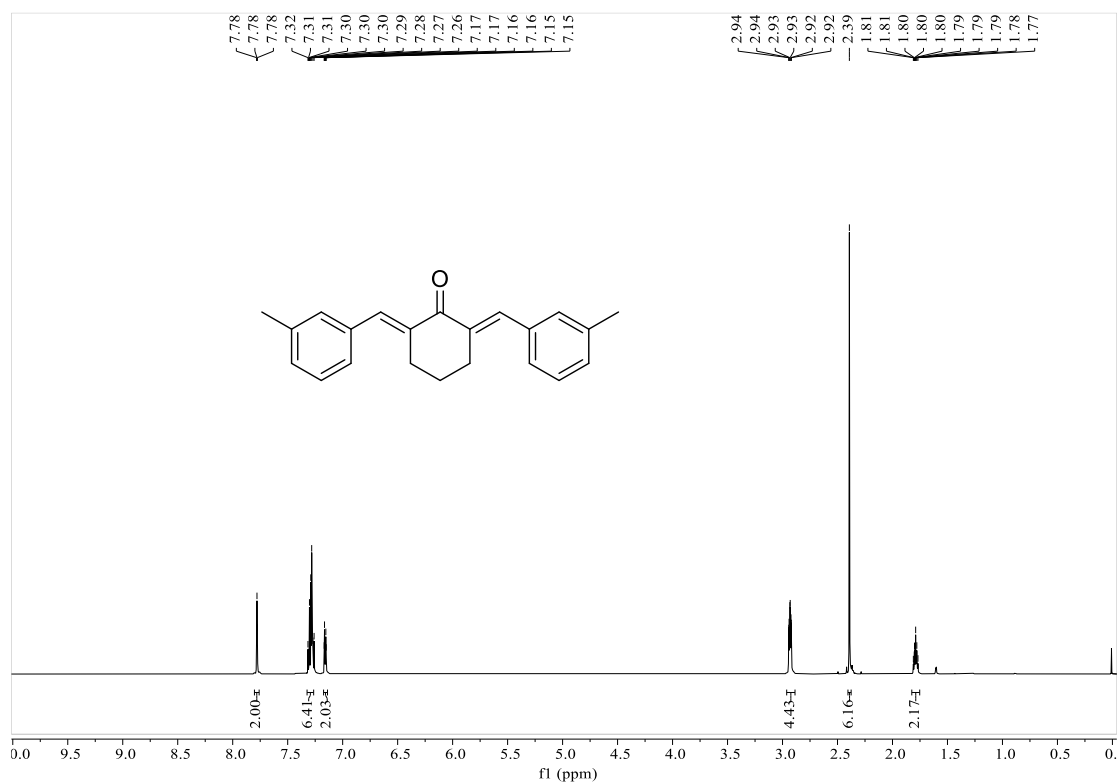

<sup>1</sup>H NMR (600 MHz, Chloroform-*d*)



2,6-Bis((*E*)-3-fluorobenzylidene)cyclohexan-1-one (**3e**)

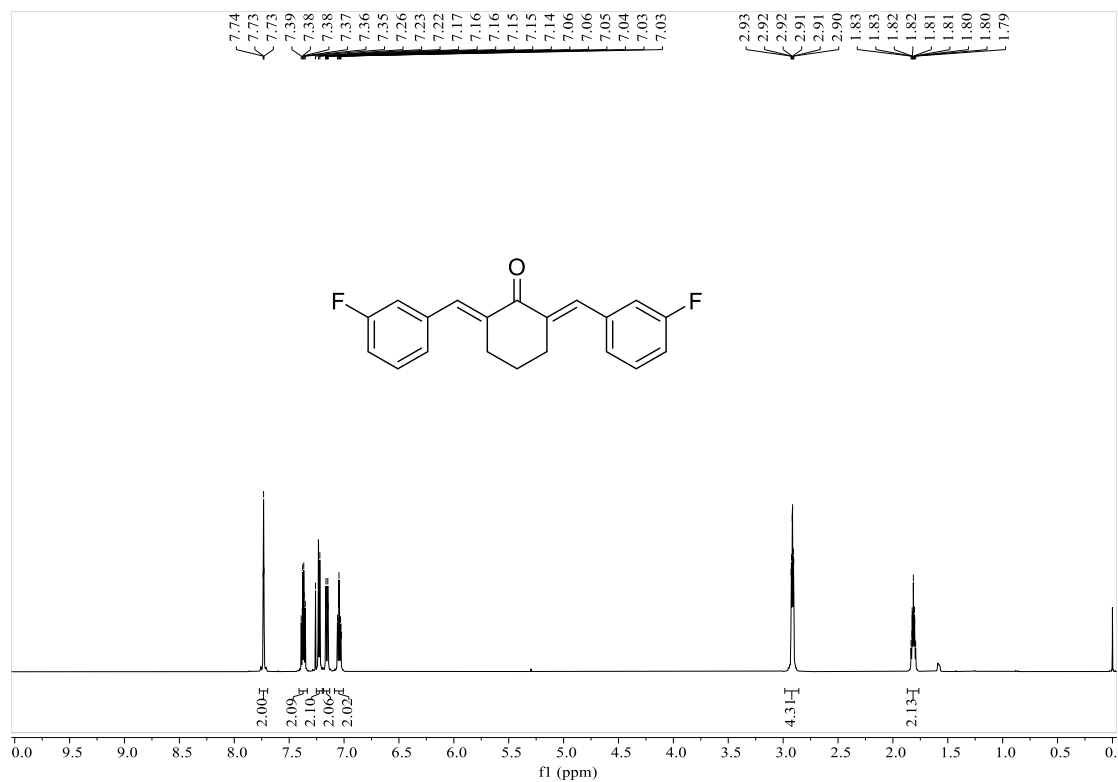

<sup>1</sup>H NMR (600 MHz, Chloroform-*d*)

2,6-Bis((*E*)-4-methylbenzylidene)cyclohexan-1-one (**3f**)

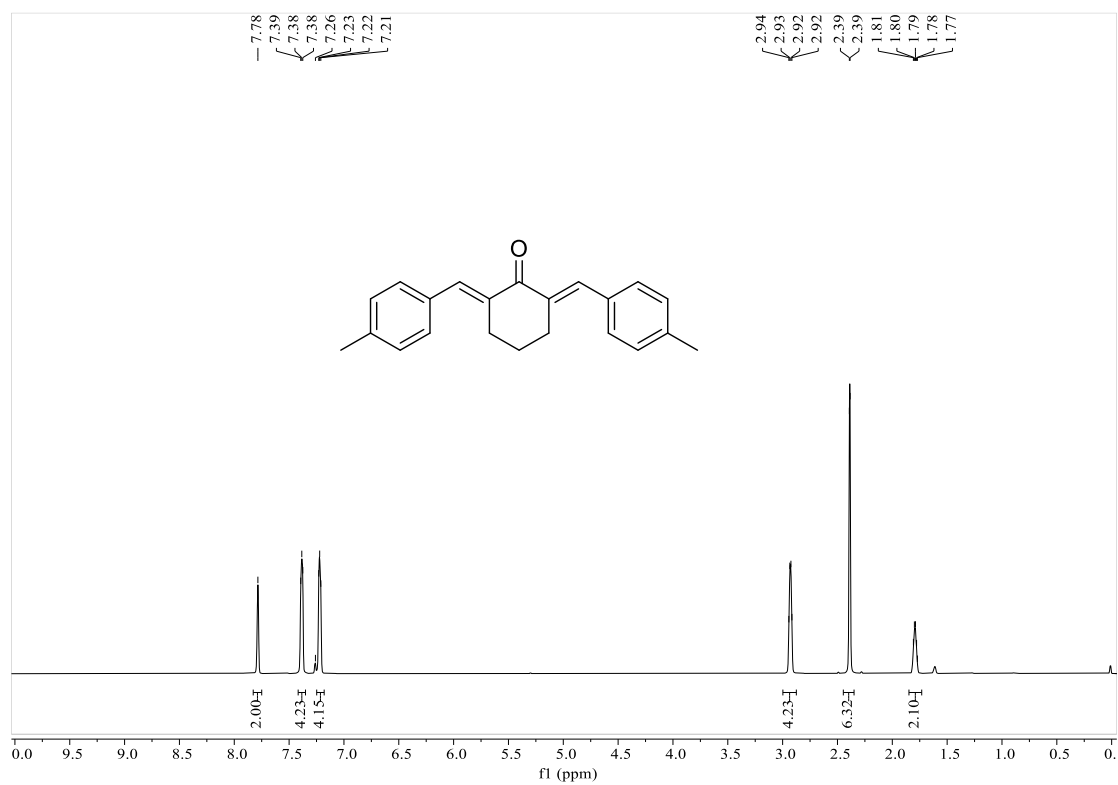

<sup>1</sup>H NMR (600 MHz, Chloroform-*d*)

2,6-Bis(*E*-2-fluorobenzylidene)cyclohexan-1-one (**3g**)

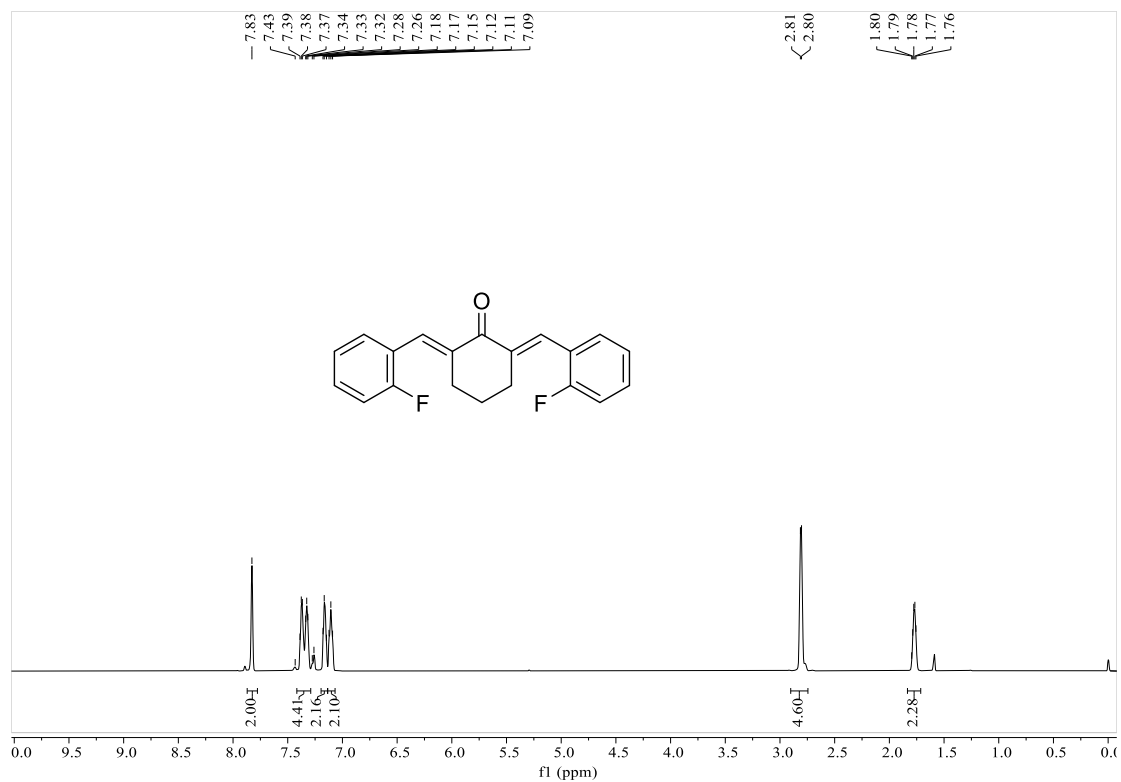

$^1\text{H}$  NMR (600 MHz, Chloroform-*d*)

2,6-Bis(*E*-3,4-dichlorobenzylidene)cyclohexan-1-one (**3h**)

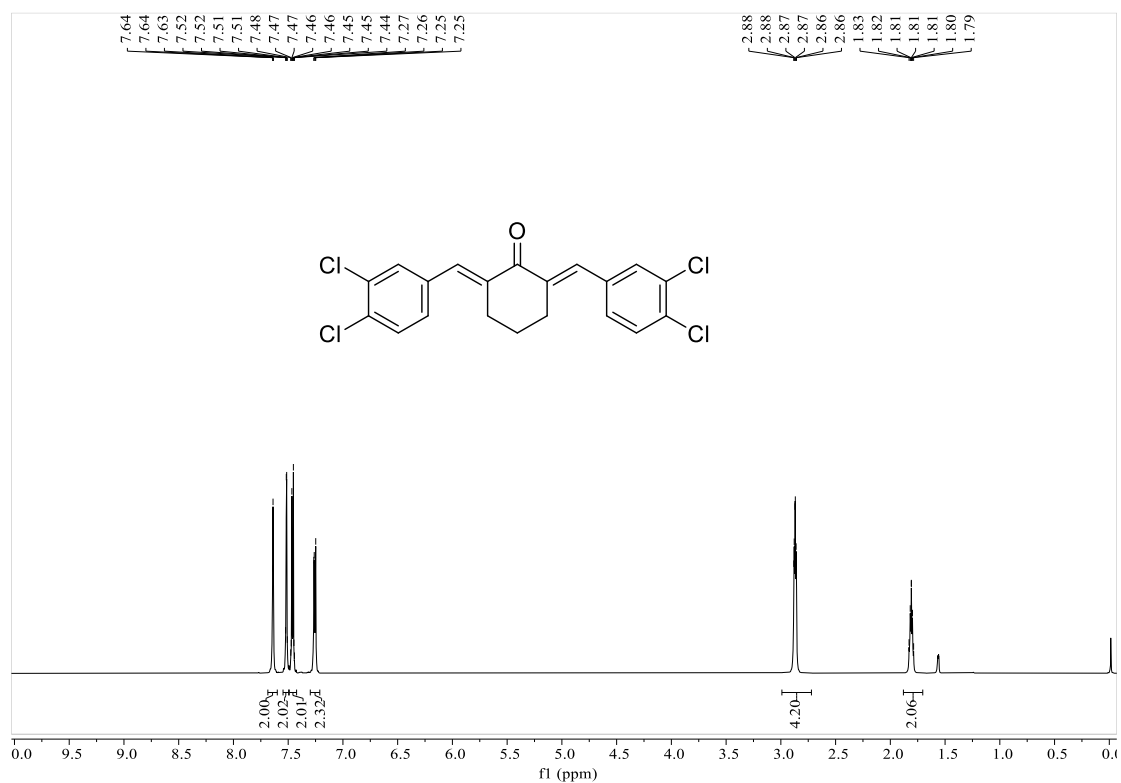

$^1\text{H}$  NMR (600 MHz, Chloroform-*d*)

(2*E*,6*E*)-2,6-Bis(furan-2-ylmethylene)cyclohexan-1-one (**3i**)

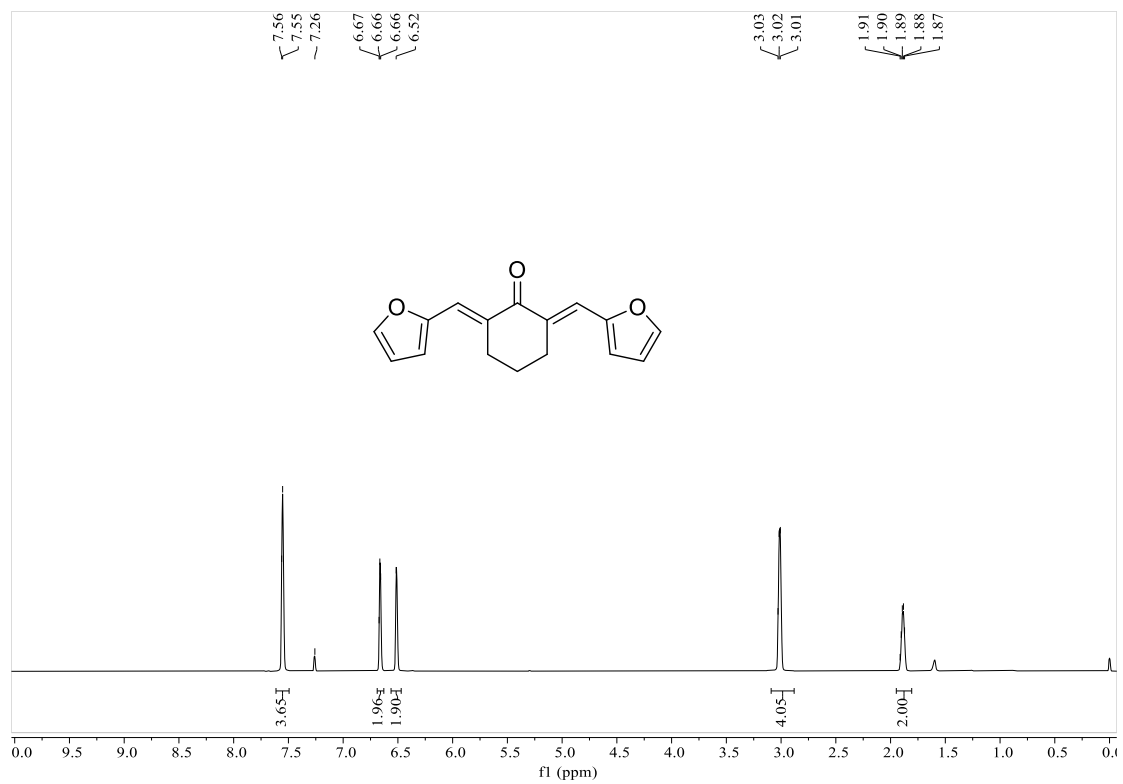

<sup>1</sup>H NMR (600 MHz, Chloroform-*d*)

(S)-3-Benzylchroman-4-one (2a)

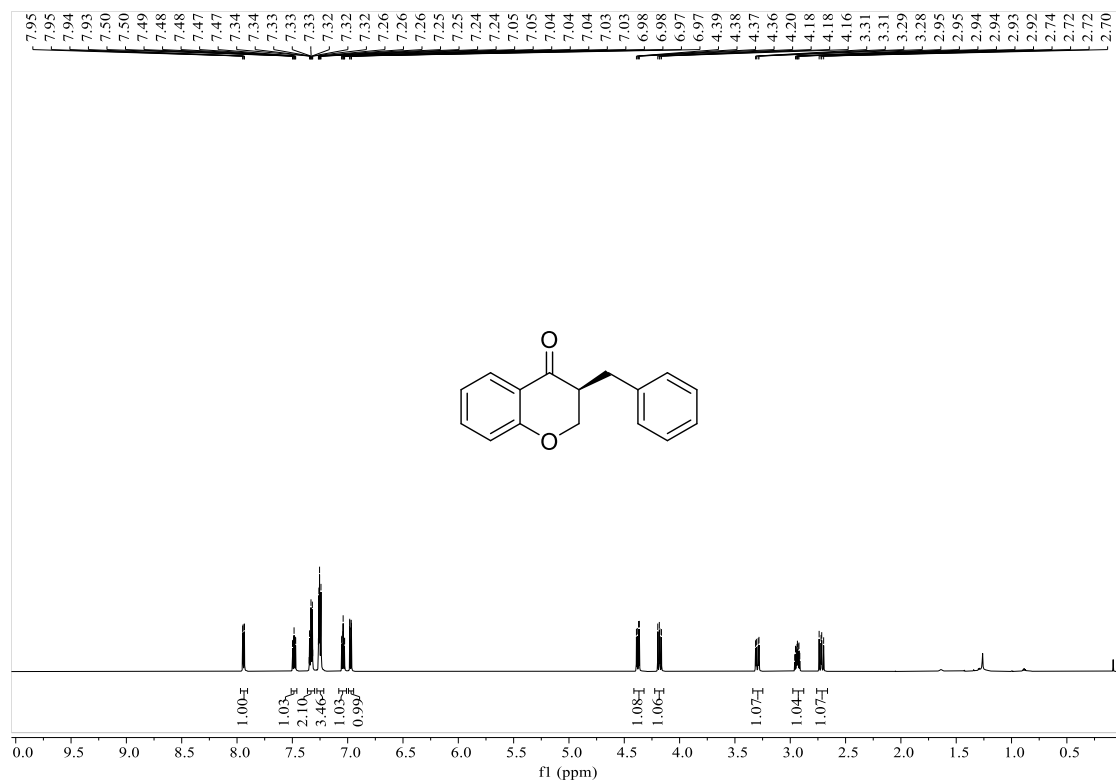

<sup>1</sup>H NMR (600 MHz, Chloroform-*d*)

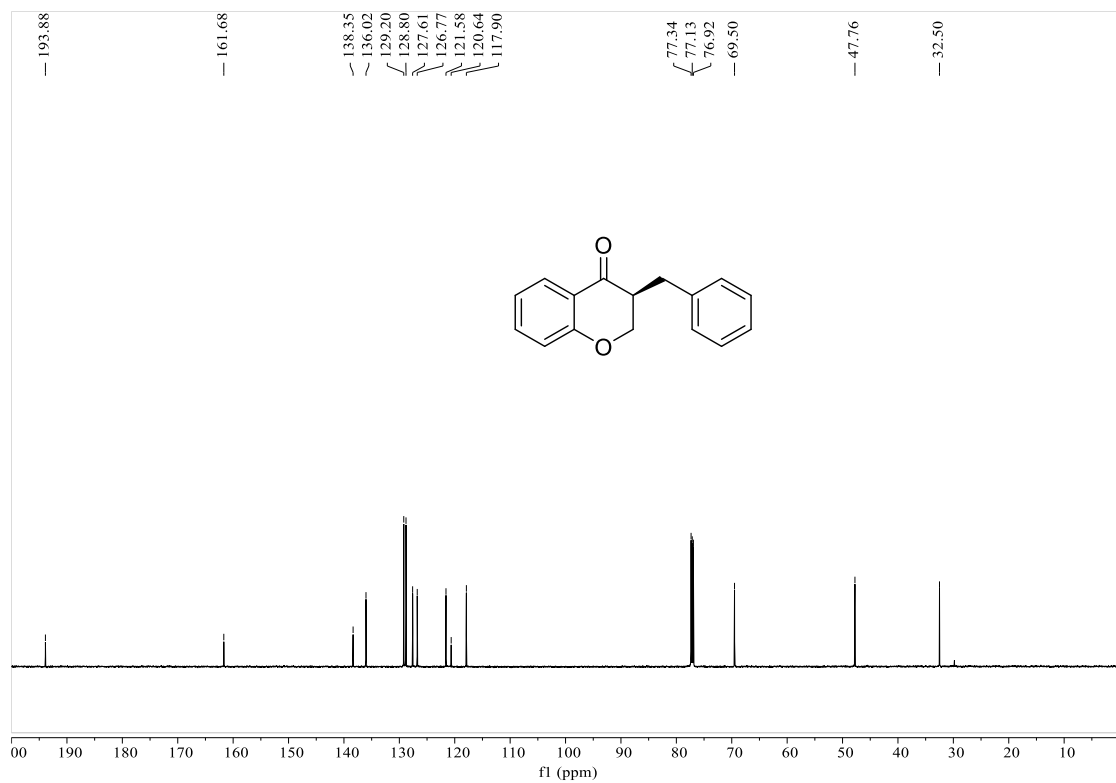

<sup>13</sup>C NMR (151 MHz, Chloroform-*d*)

3-(3-Methylbenzyl)chroman-4-one (2b)

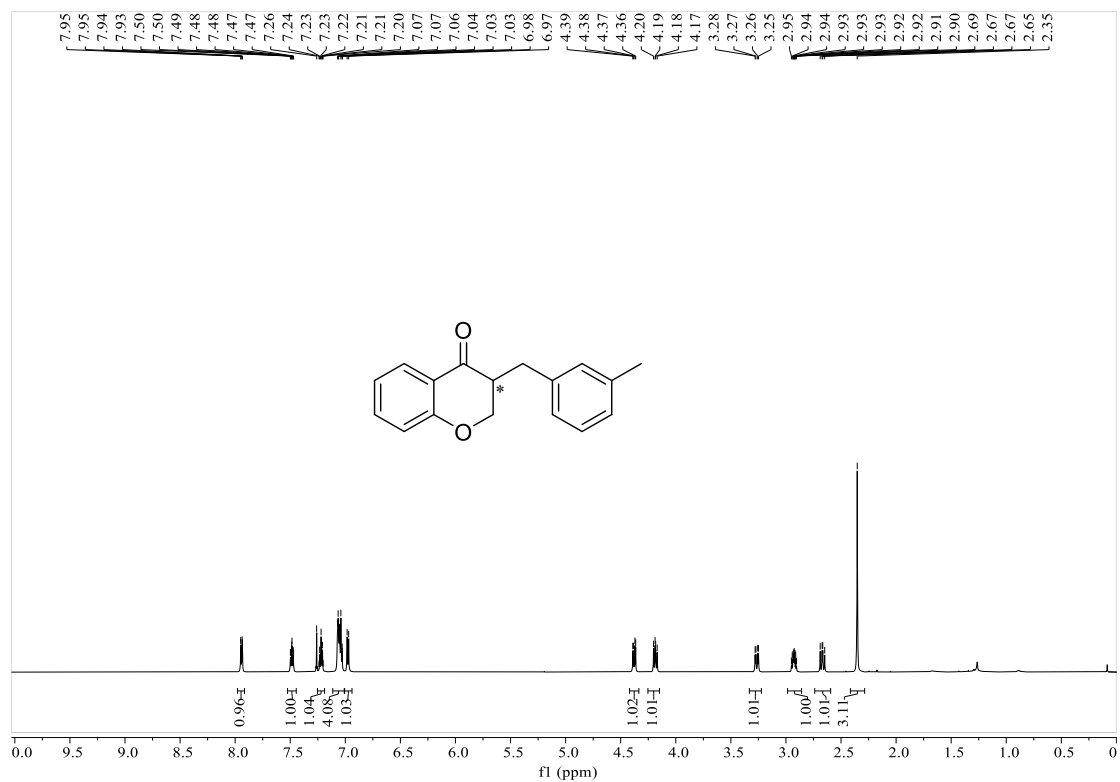

<sup>1</sup>H NMR (600 MHz, Chloroform-*d*)

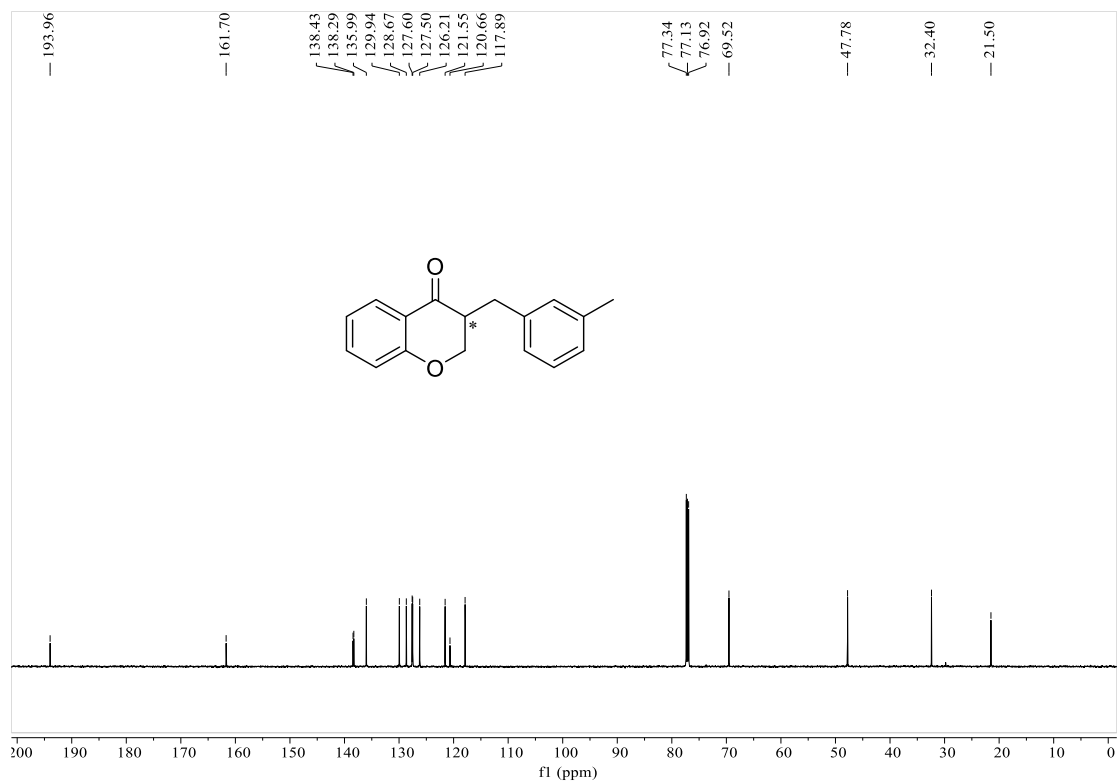

<sup>13</sup>C NMR (151 MHz, Chloroform-*d*)

3-(3-Methoxybenzyl)chroman-4-one (**2c**)

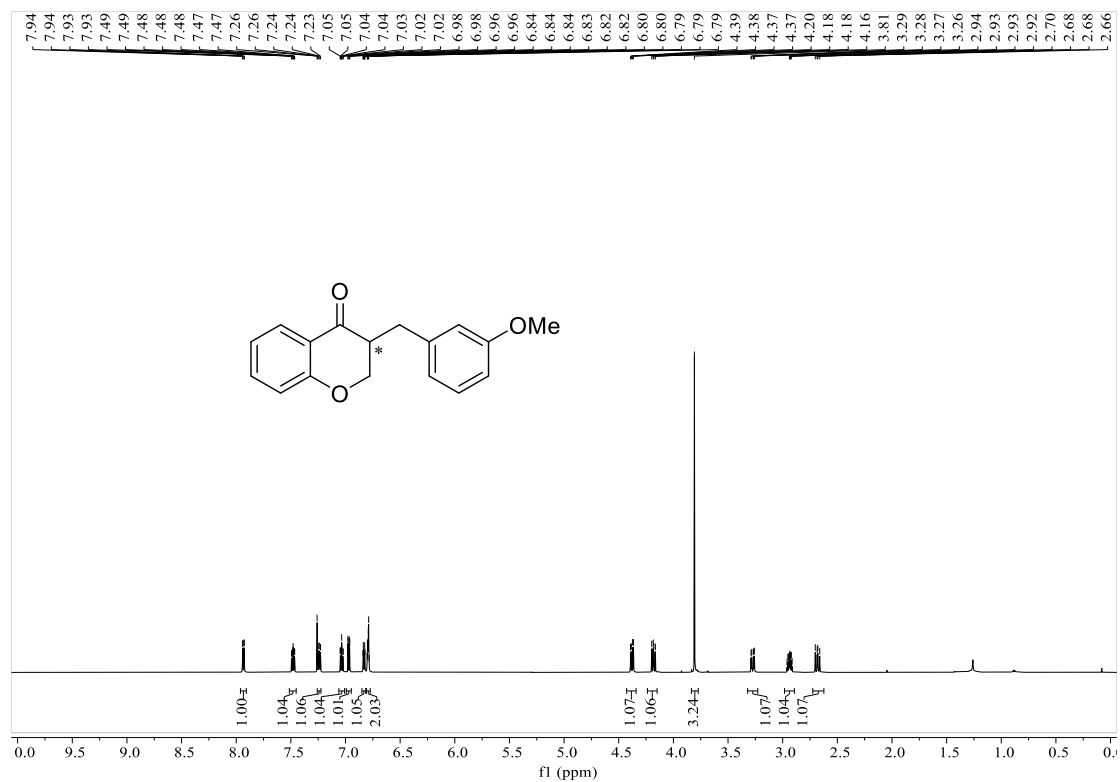

**<sup>1</sup>H NMR (600 MHz, Chloroform-*d*)**

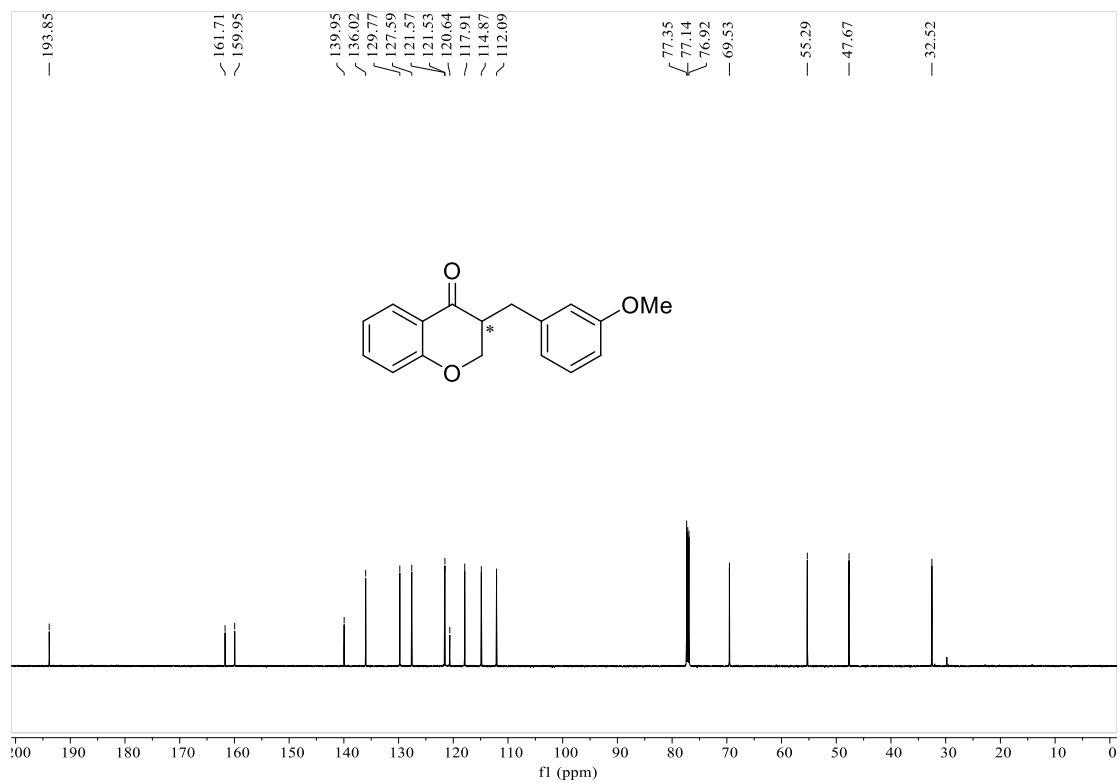

**<sup>13</sup>C NMR (151 MHz, Chloroform-*d*)**

3-(3-Fluorobenzyl)chroman-4-one (**2d**)

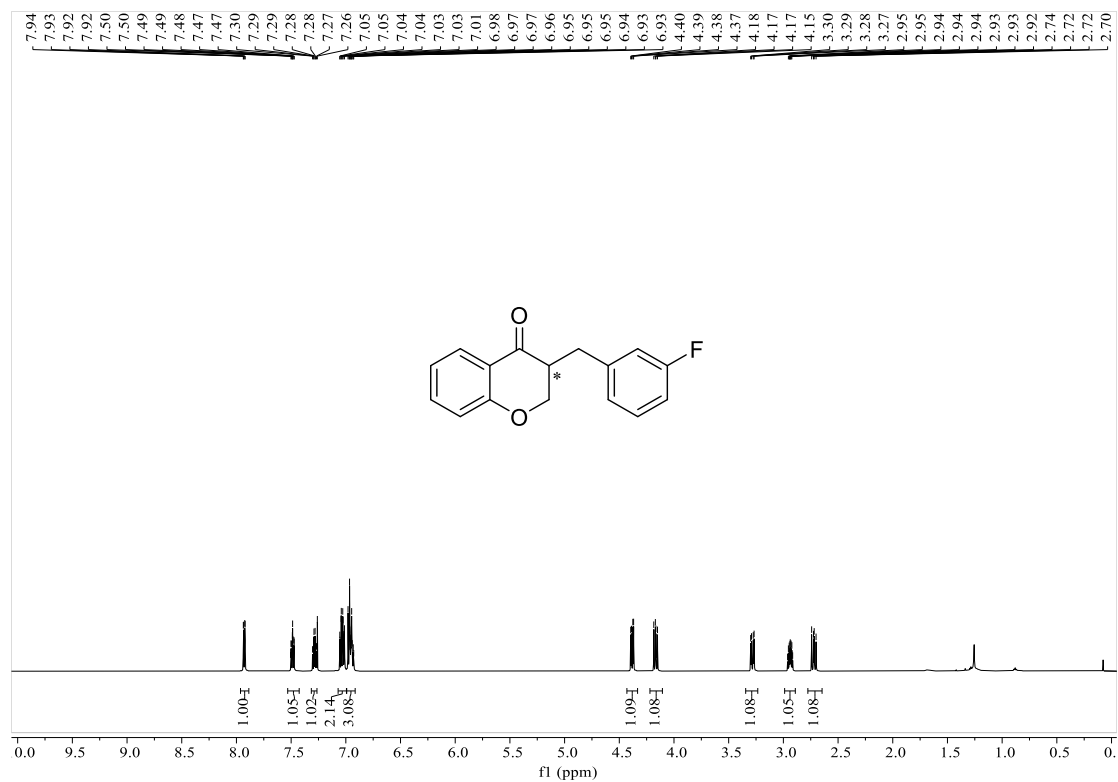

**<sup>1</sup>H NMR (600 MHz, Chloroform-*d*)**

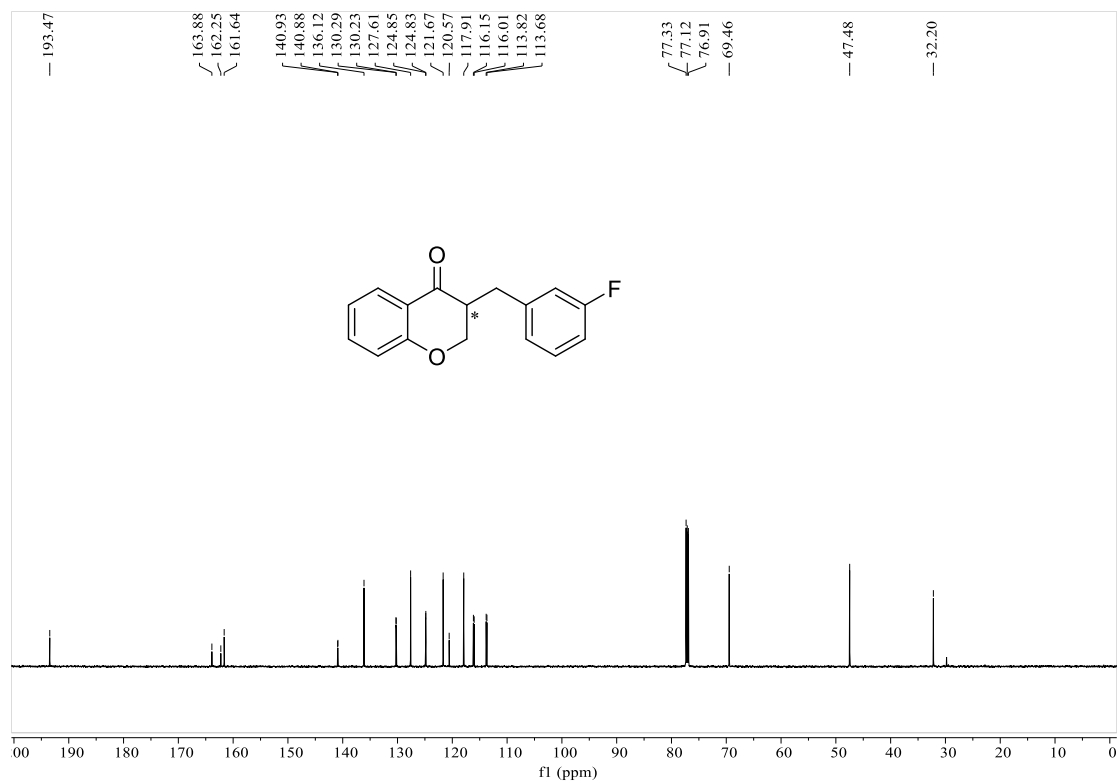

**<sup>13</sup>C NMR (151 MHz, Chloroform-*d*)**

3-(4-Methylbenzyl)chroman-4-one (2e)

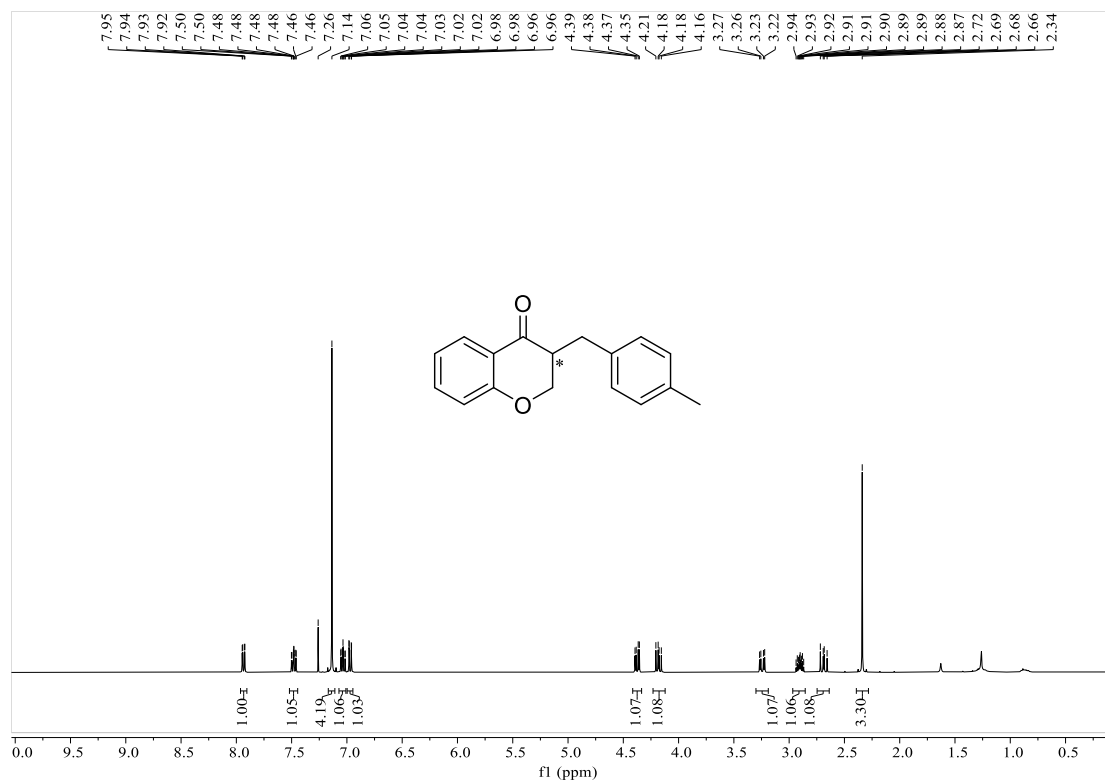

<sup>1</sup>H NMR (400 MHz, Chloroform-*d*)

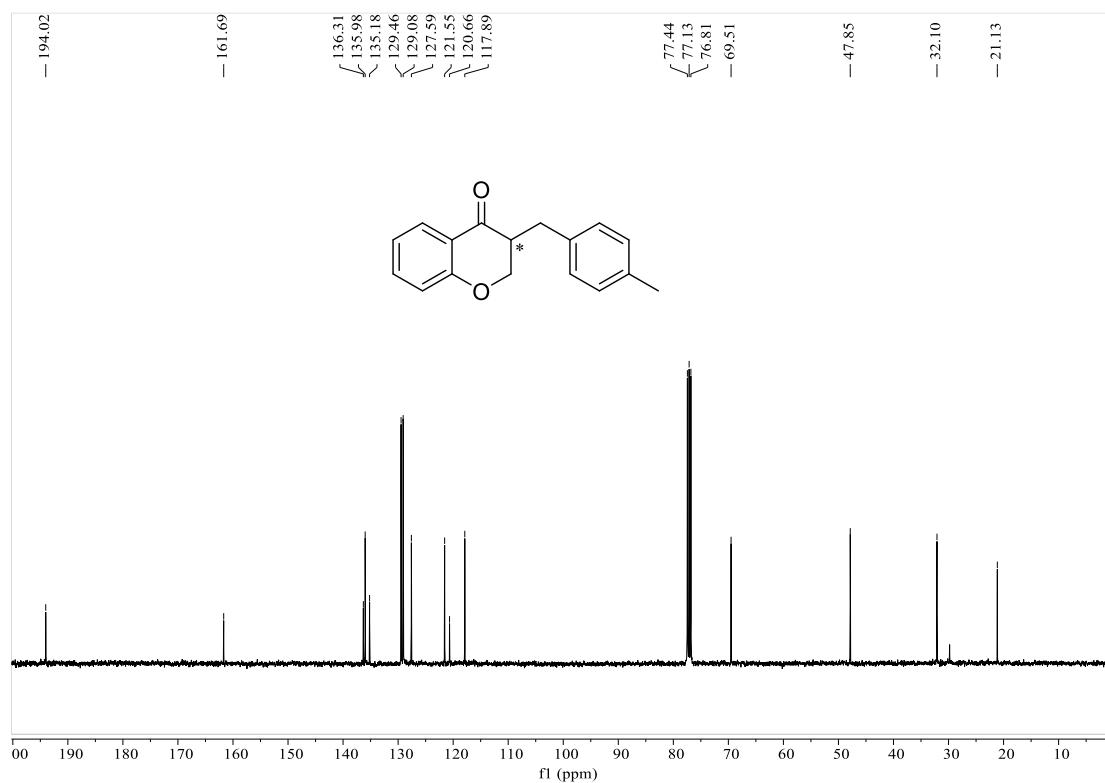

<sup>13</sup>C NMR (101 MHz, Chloroform-*d*)



3-(4-Methoxybenzyl)chroman-4-one (**2f**)

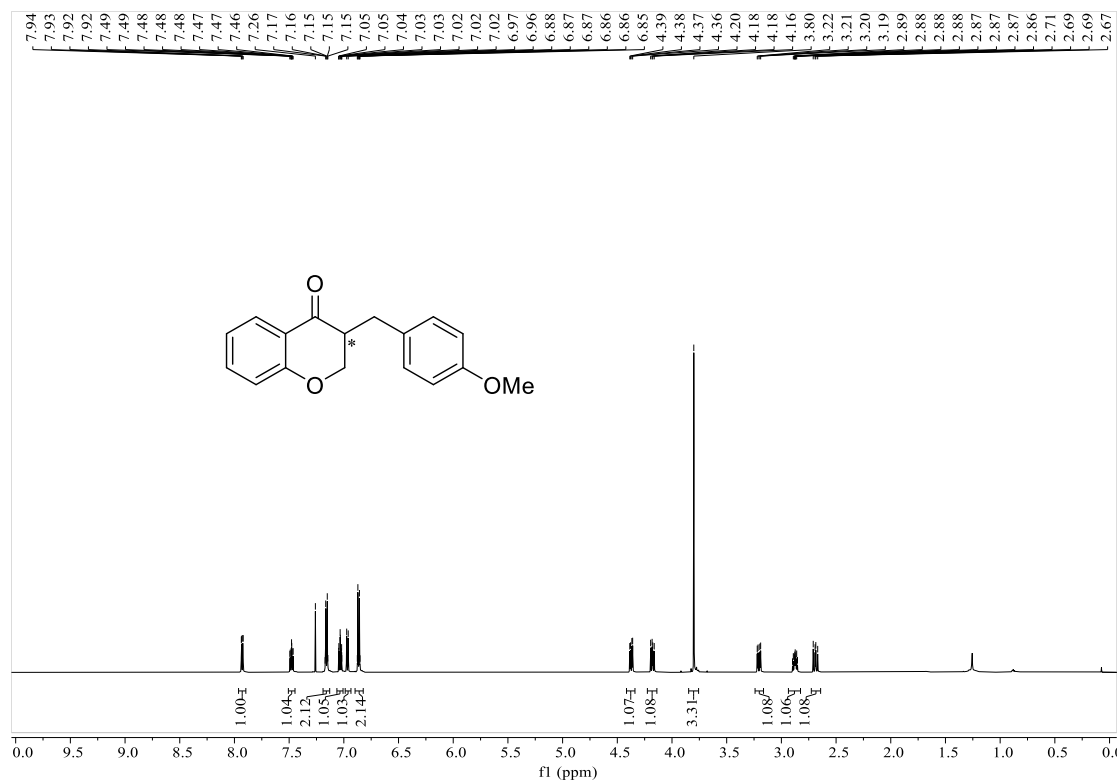

**<sup>1</sup>H NMR (600 MHz, Chloroform-*d*)**

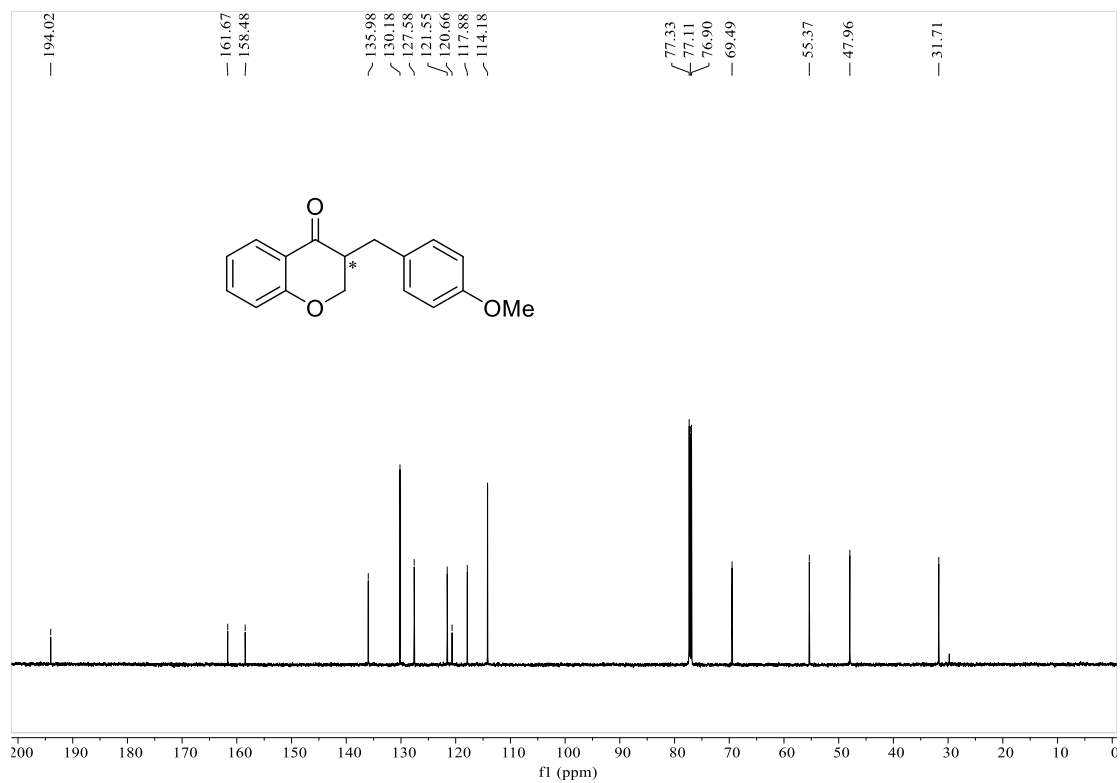

**<sup>13</sup>C NMR (151 MHz, Chloroform-*d*)**

3-(4-Chlorobenzyl)chroman-4-one (2g)

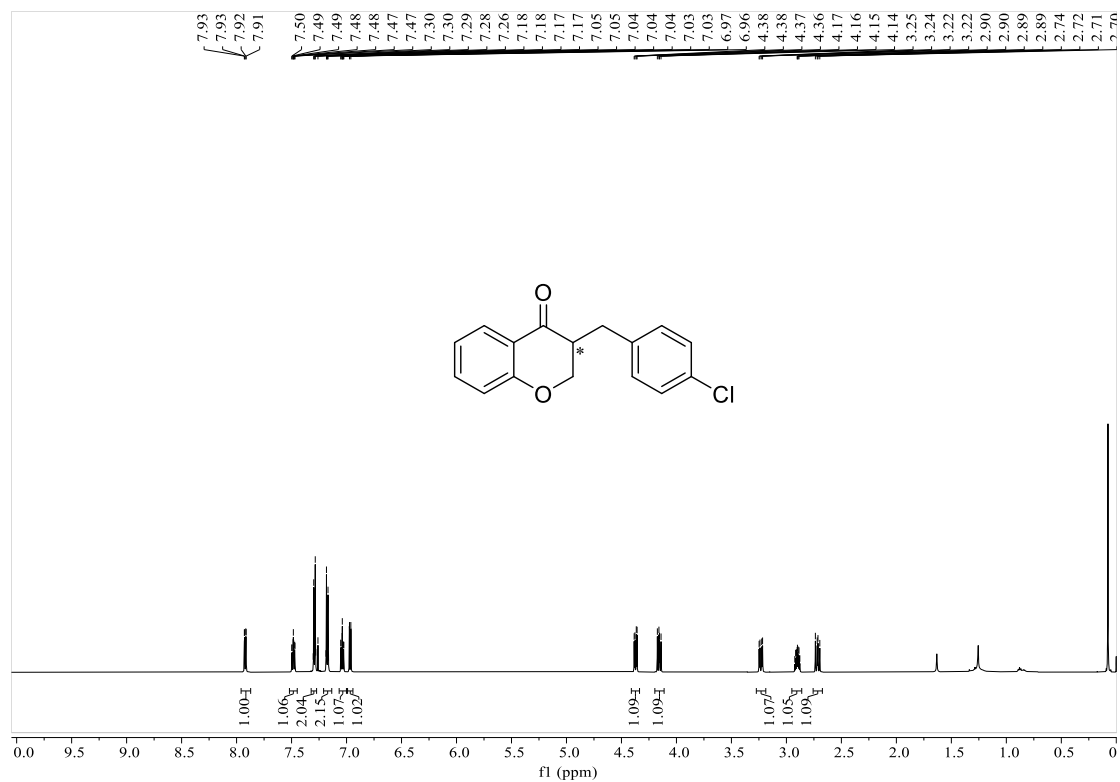

<sup>1</sup>H NMR (600 MHz, Chloroform-*d*)

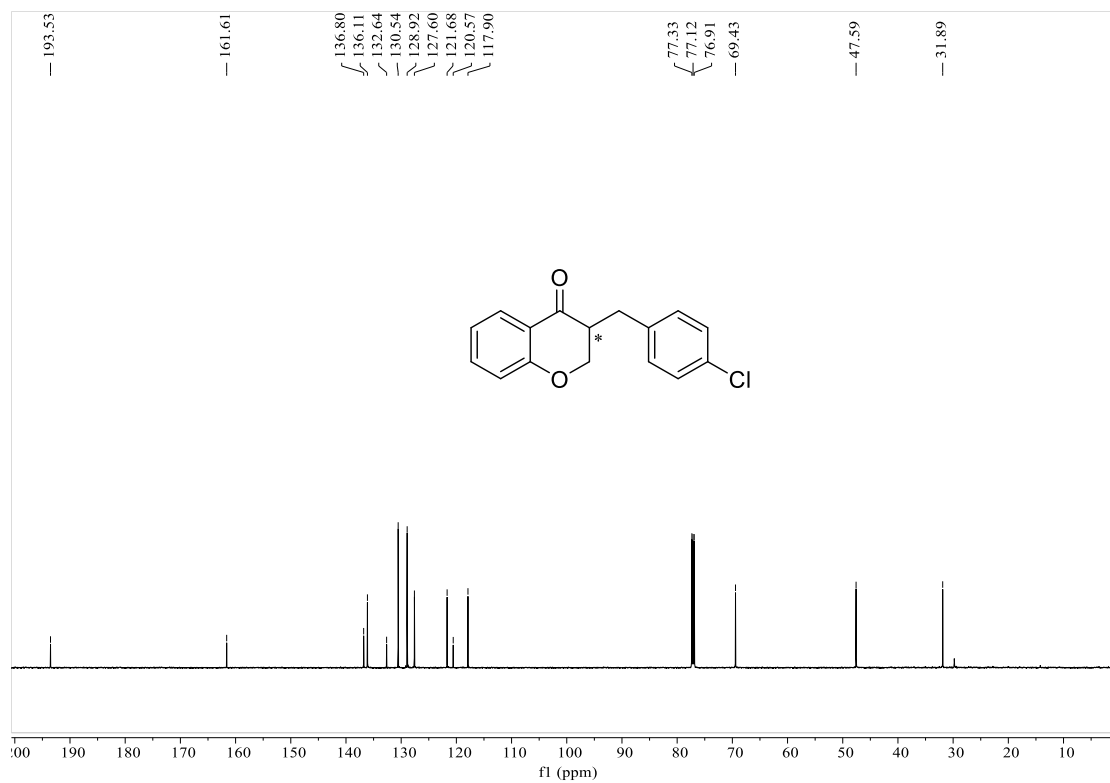

<sup>13</sup>C NMR (151 MHz, Chloroform-*d*)

3-(2-Methylbenzyl)chroman-4-one (2h)

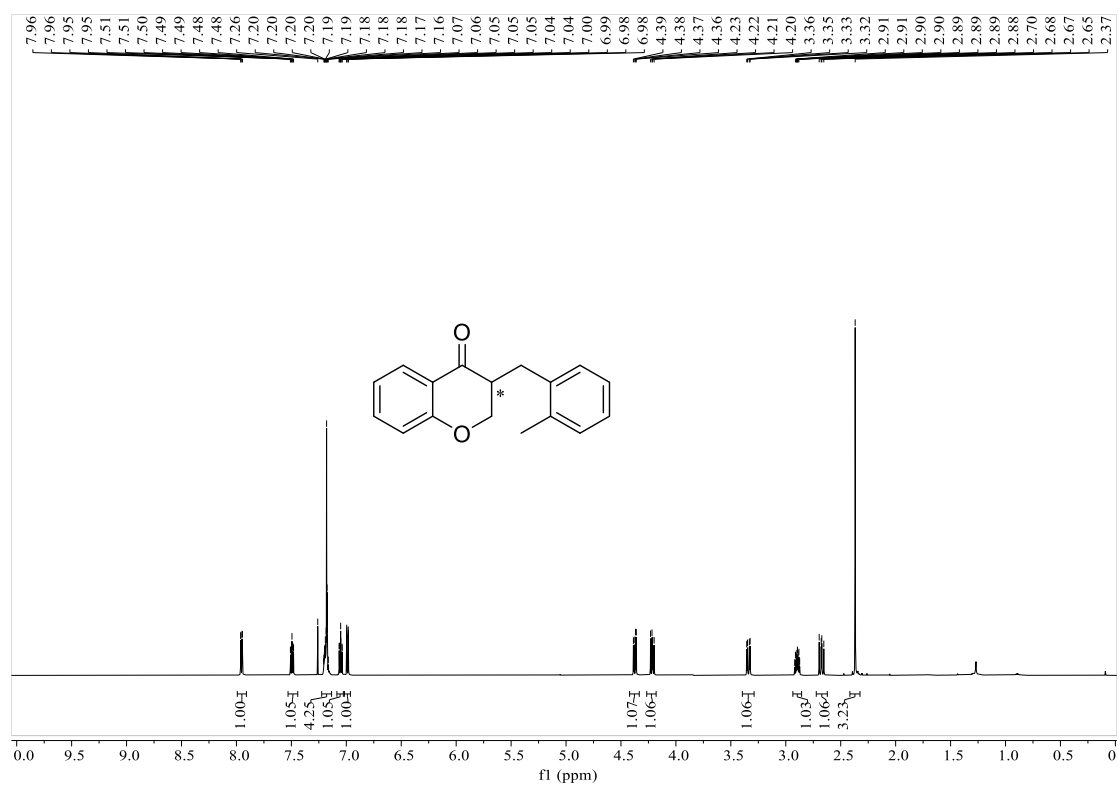

<sup>1</sup>H NMR (600 MHz, Chloroform-*d*)

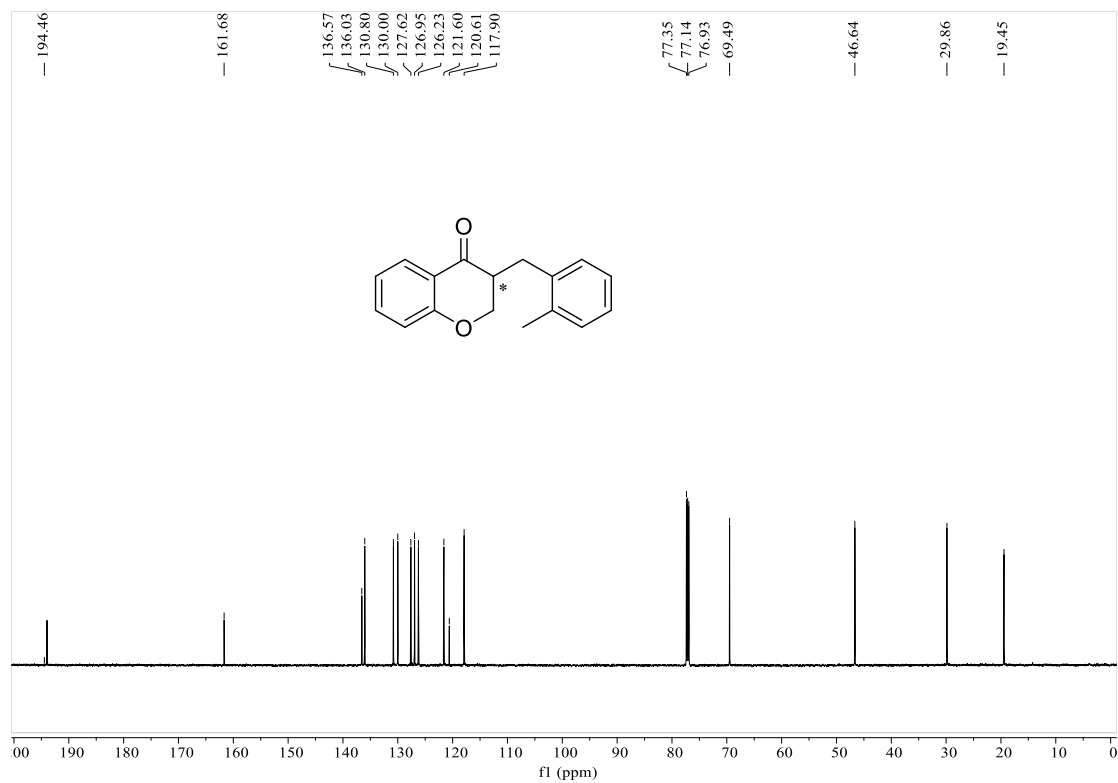

<sup>13</sup>C NMR (151 MHz, Chloroform-*d*)

3-(2-Methoxybenzyl)chroman-4-one (**2i**)

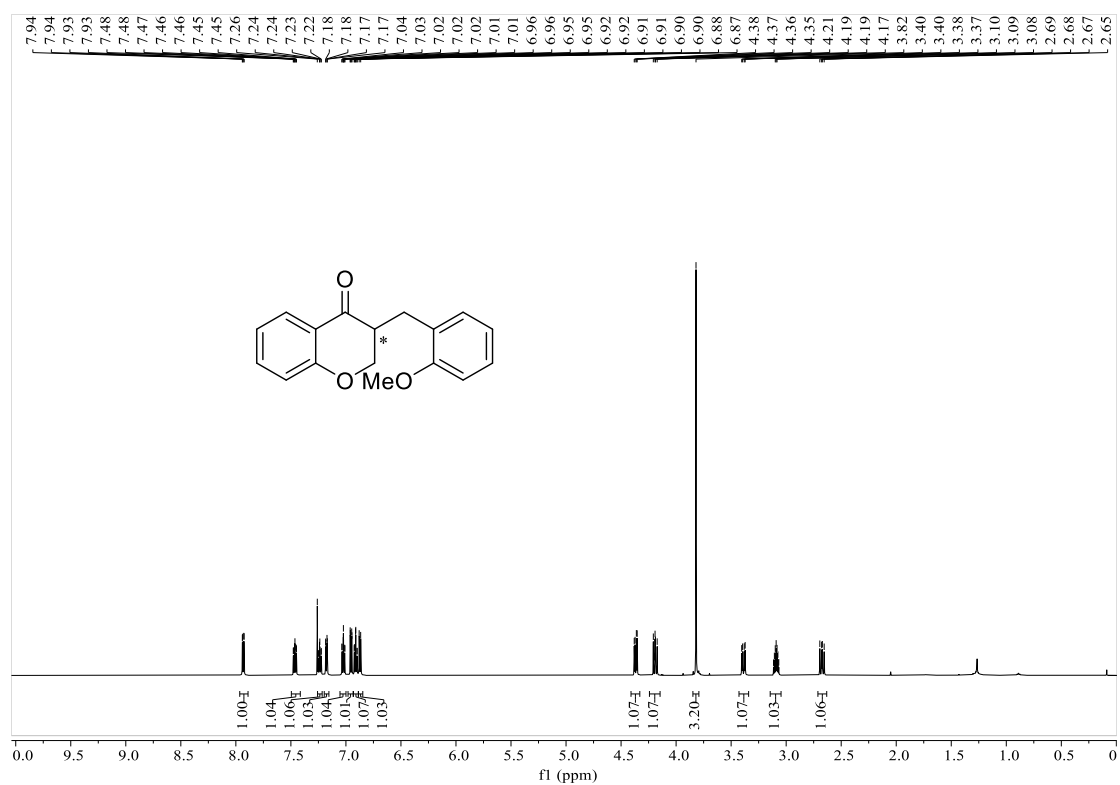

**<sup>1</sup>H NMR (600 MHz, Chloroform-*d*)**

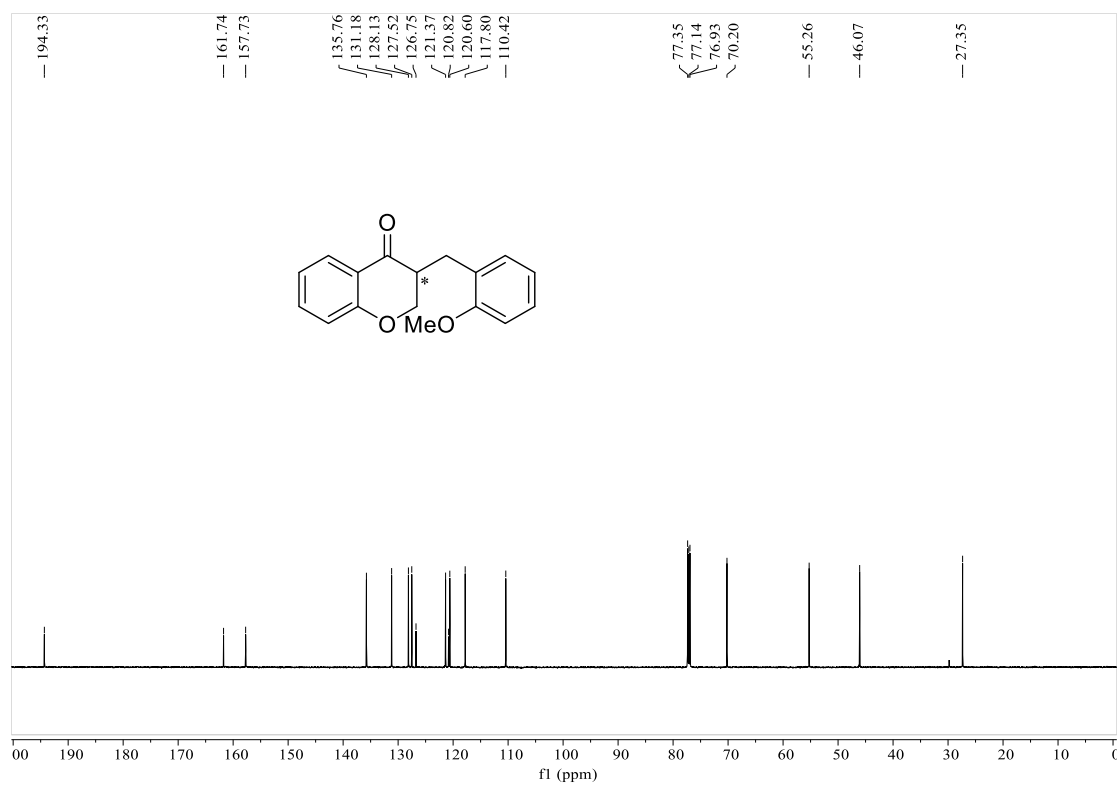

**<sup>13</sup>C NMR (151 MHz, Chloroform-*d*)**

3-(2-Bromobenzyl)chroman-4-one (**2j**)

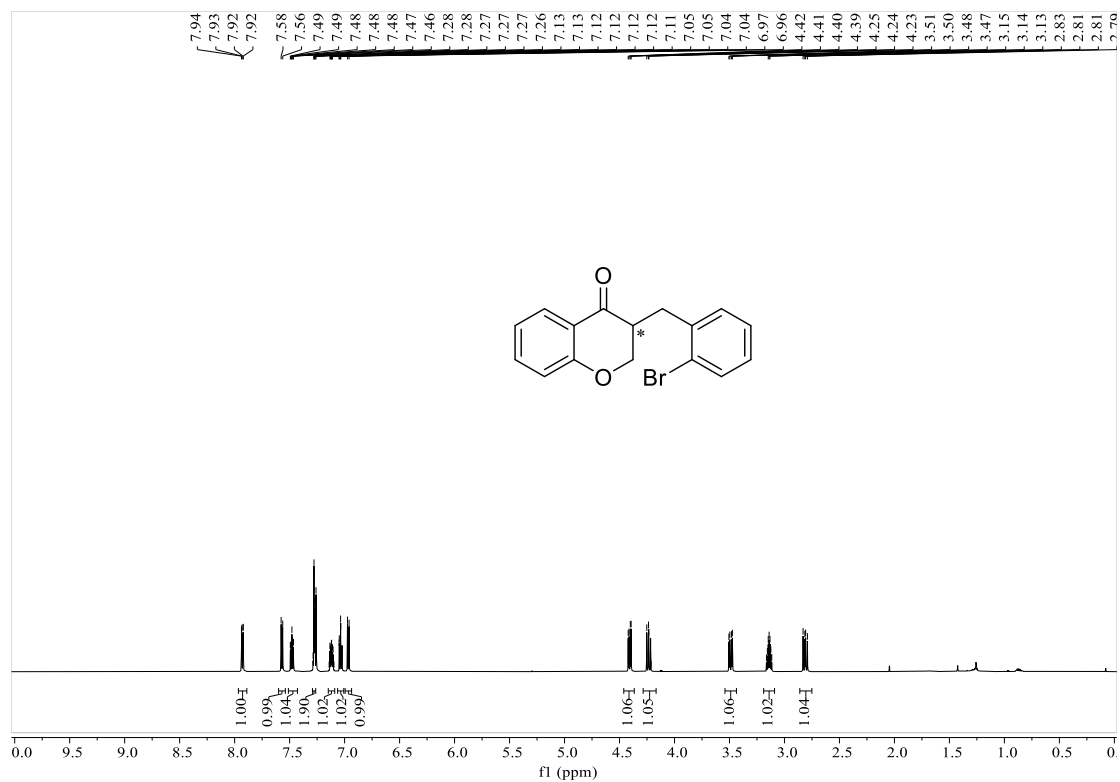

**<sup>1</sup>H NMR (600 MHz, Chloroform-*d*)**

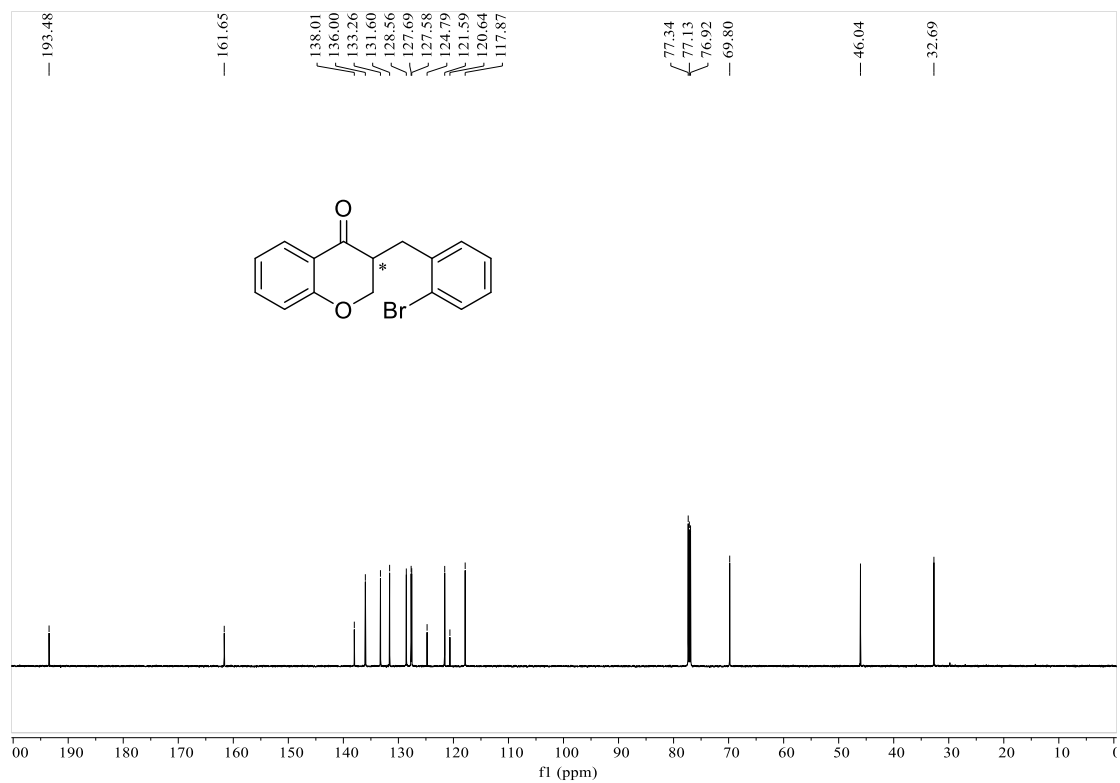

**<sup>13</sup>C NMR (151 MHz, Chloroform-*d*)**

3-(2-Fluorobenzyl)chroman-4-one (**2k**)

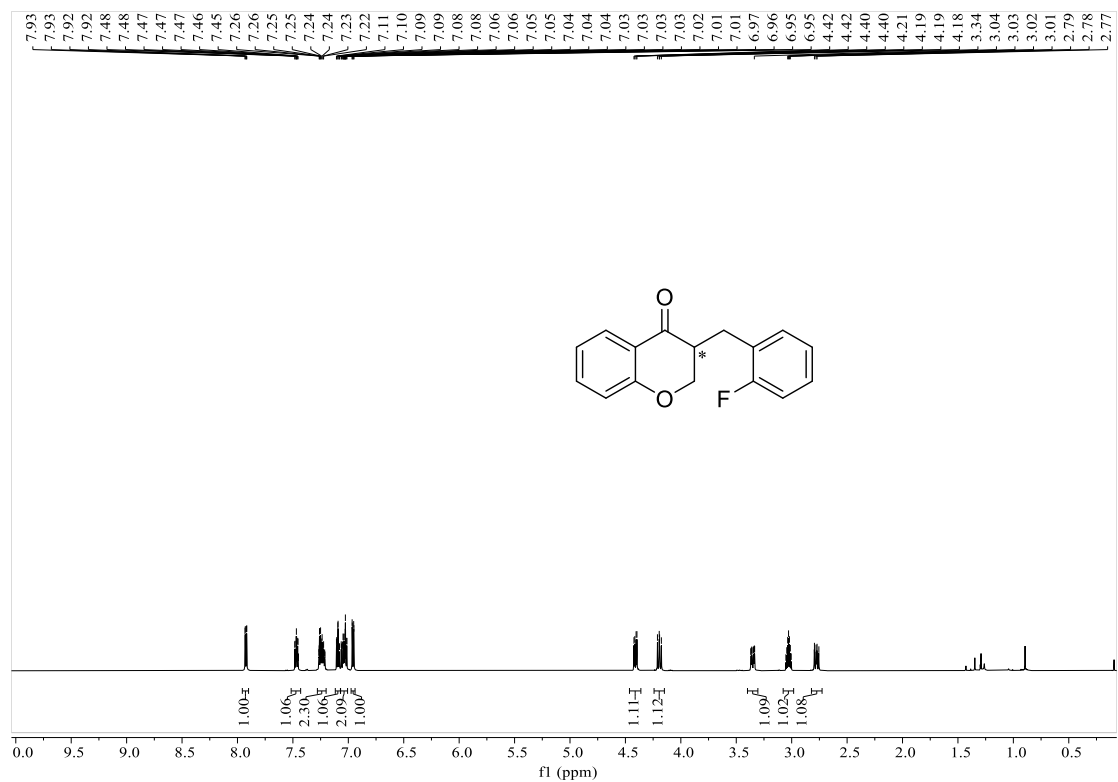

**<sup>1</sup>H NMR (600 MHz, Chloroform-*d*)**

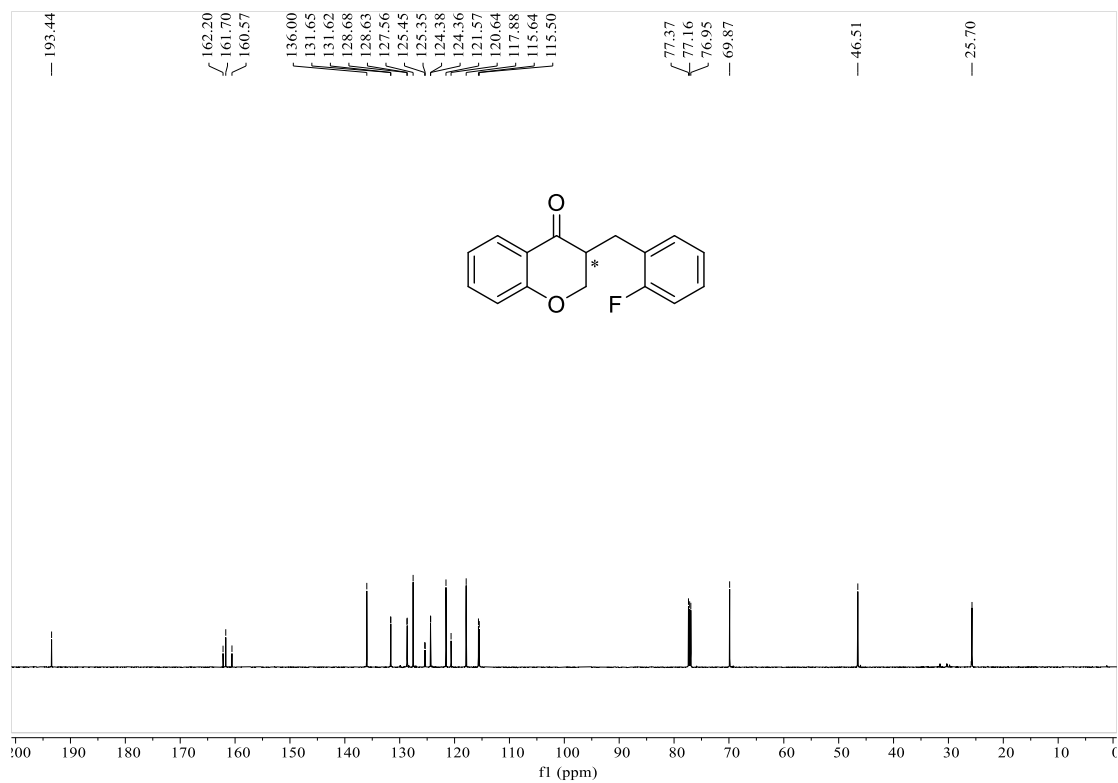

**<sup>13</sup>C NMR (151 MHz, Chloroform-*d*)**

3-(Furan-2-ylmethyl)chroman-4-one (**21**)

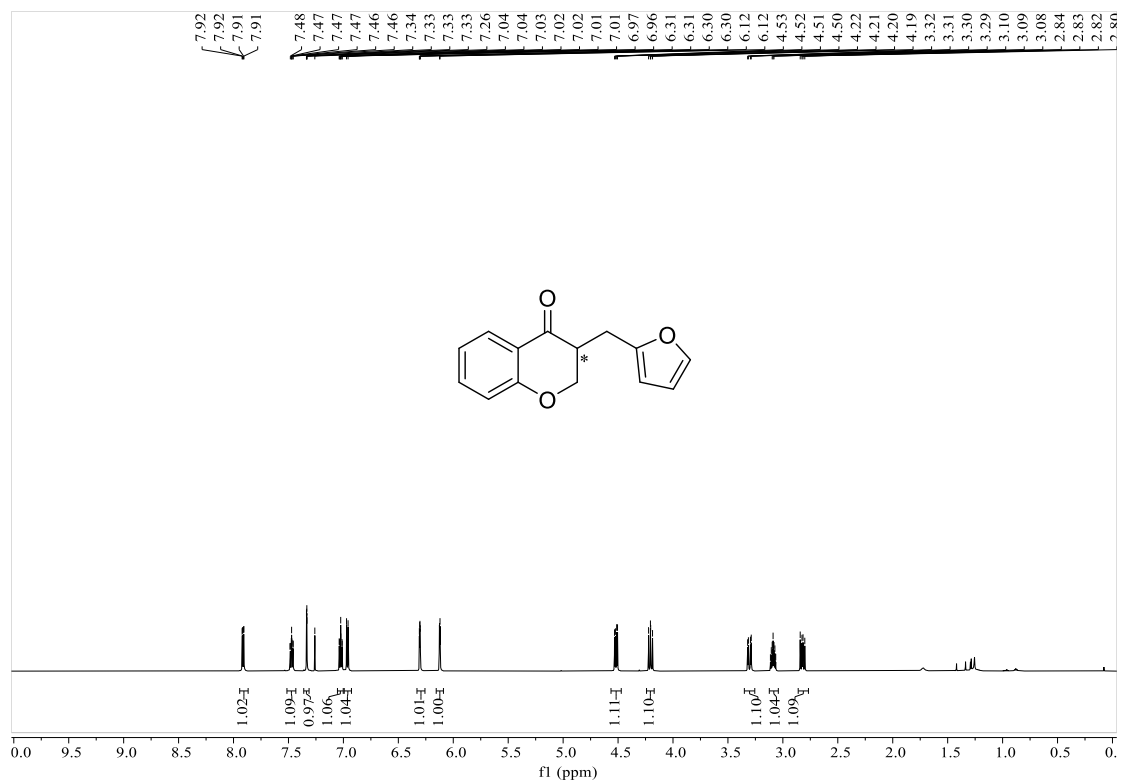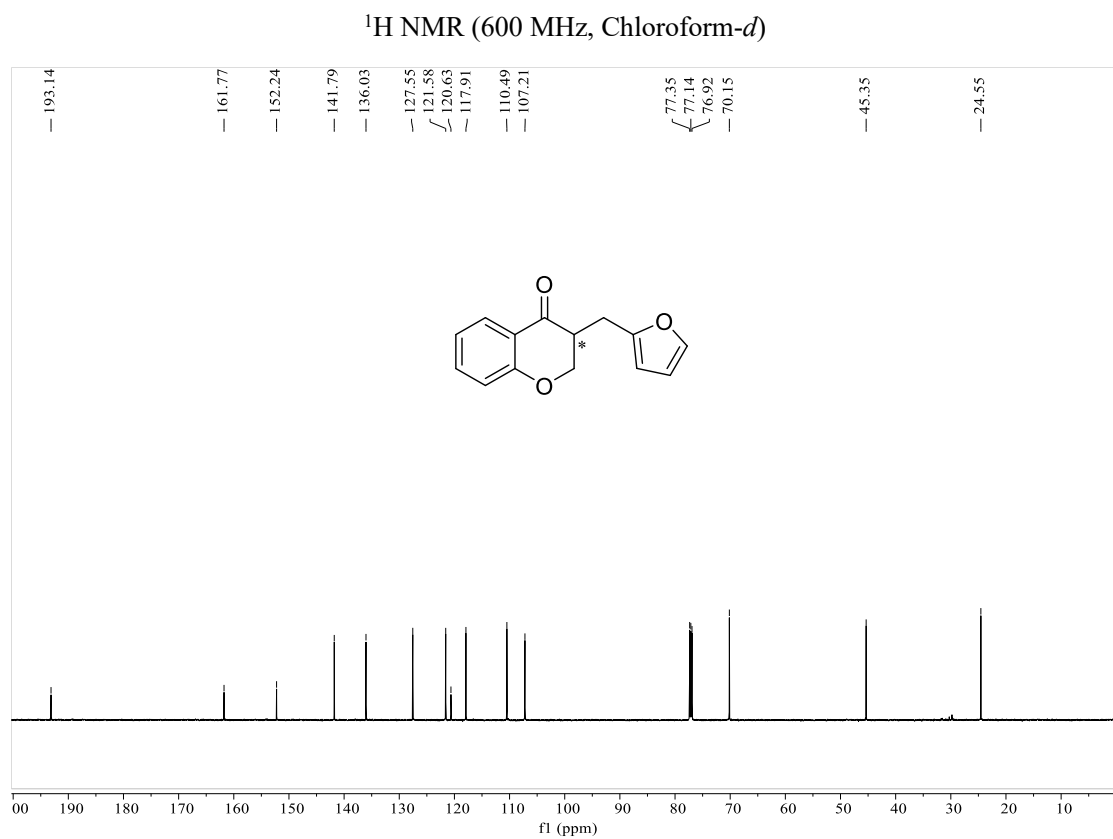

3-(Naphthalen-2-ylmethyl)chroman-4-one (**2m**)

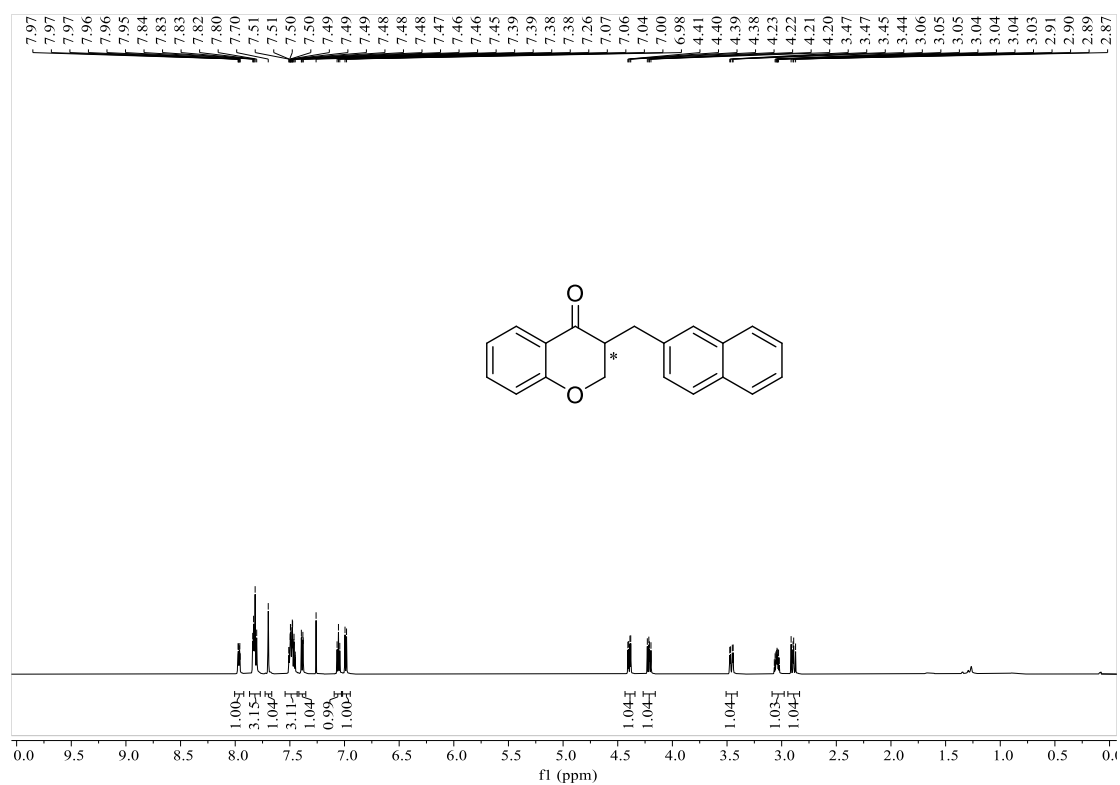

**<sup>1</sup>H NMR (600 MHz, Chloroform-*d*)**

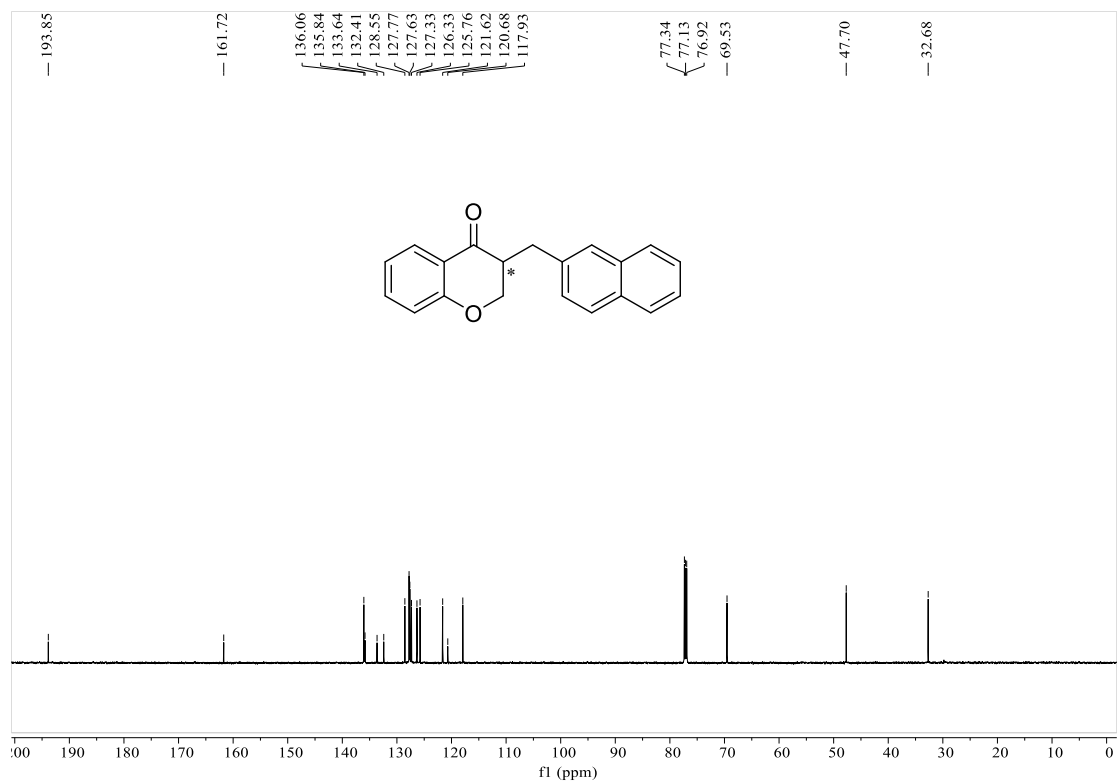

**<sup>13</sup>C NMR (151 MHz, Chloroform-*d*)**



3-(Naphthalen-1-ylmethyl)chroman-4-one (**2n**)

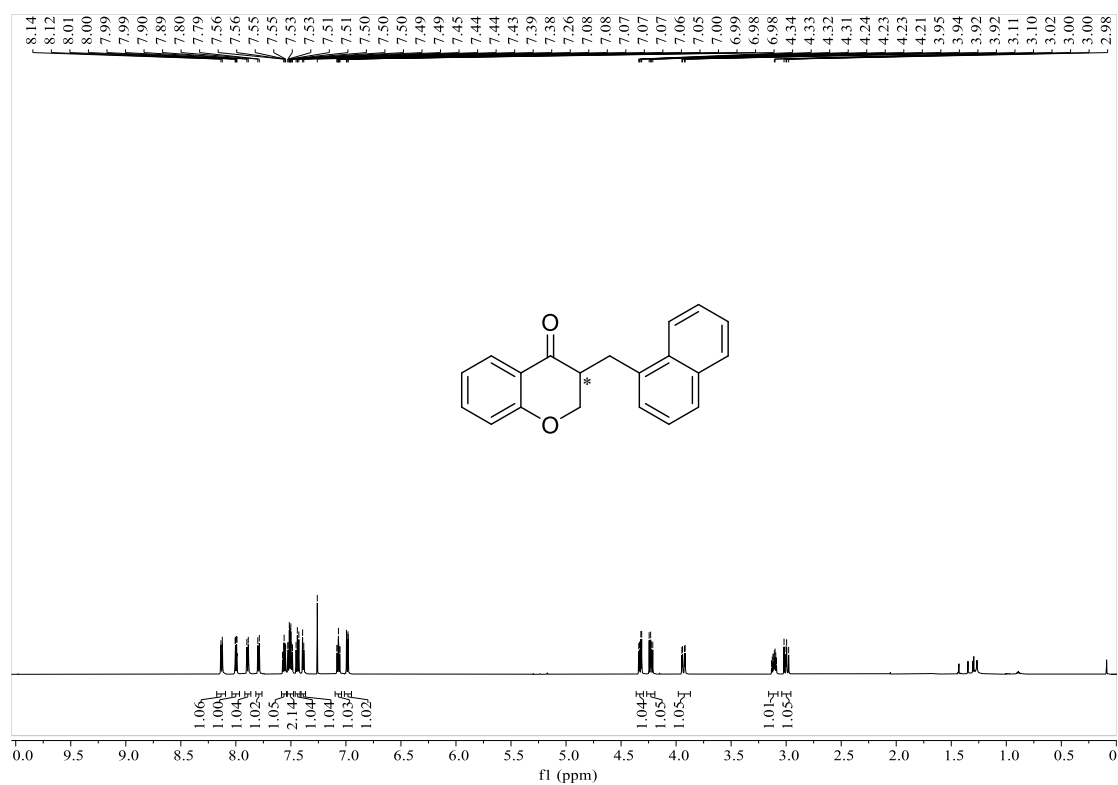

<sup>1</sup>H NMR (600 MHz, Chloroform-*d*)

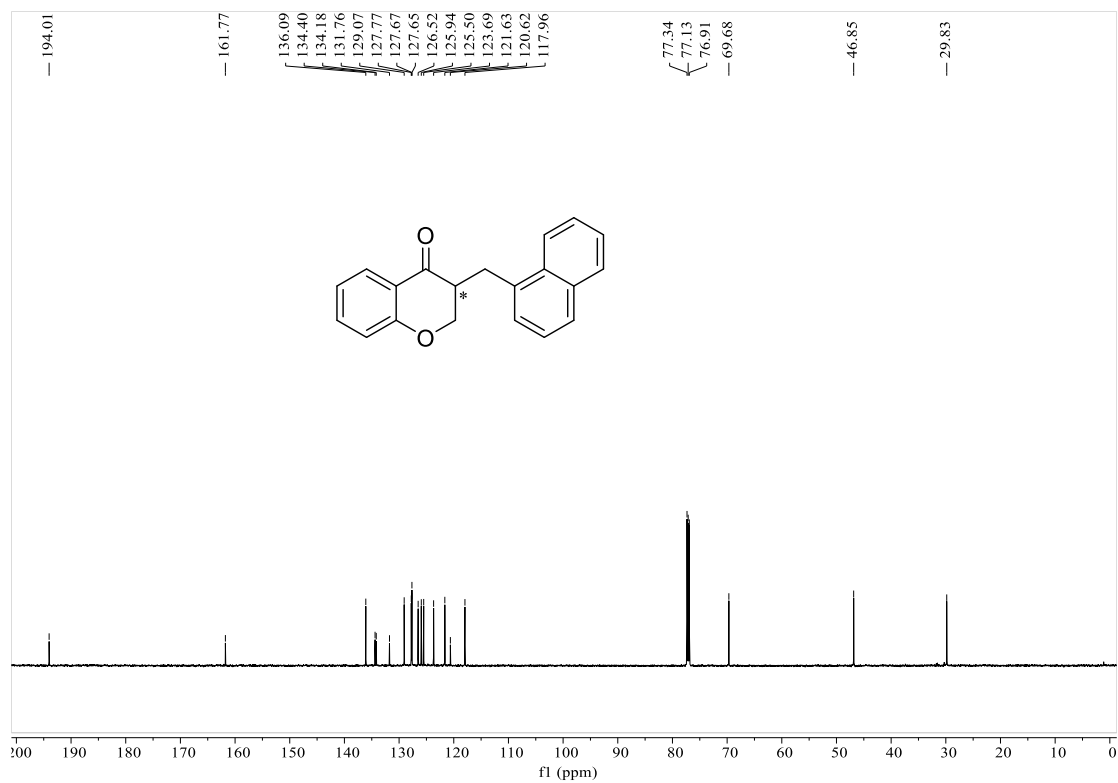

<sup>13</sup>C NMR (151 MHz, Chloroform-*d*)

3-Isobutylchroman-4-one (**2o**)

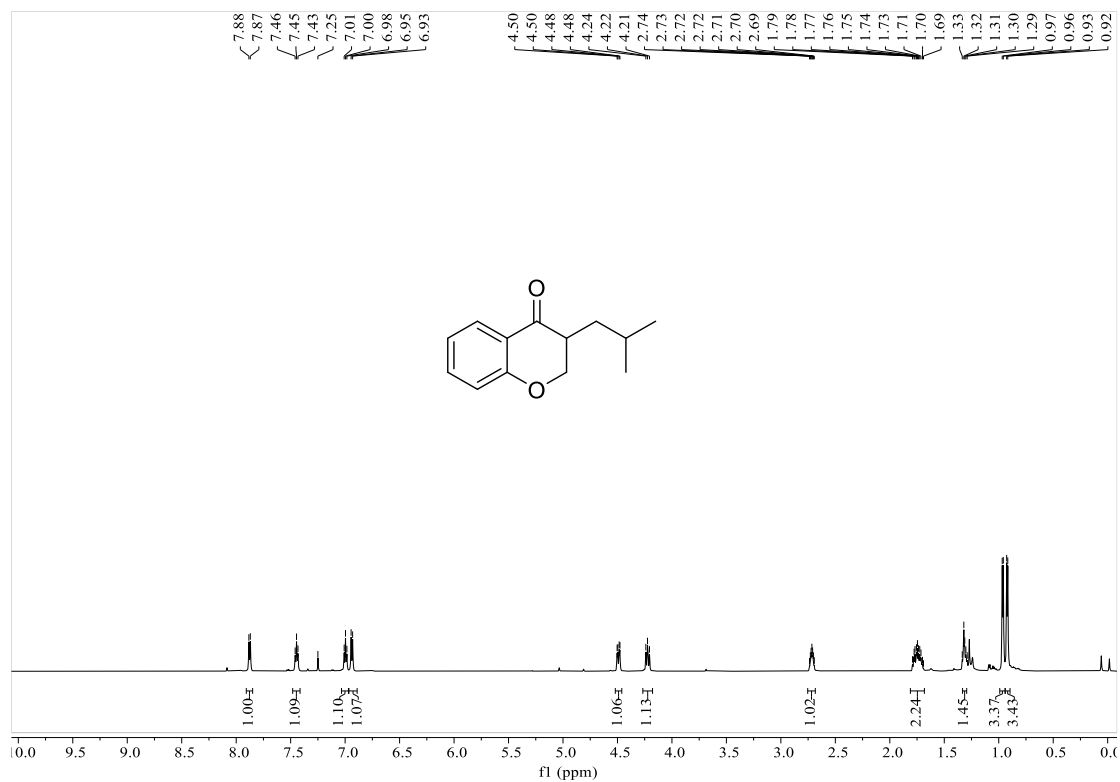

<sup>1</sup>H NMR (600 MHz, Chloroform-*d*)

3-isobutyl-4*H*-chromen-4-one (**2o'**)

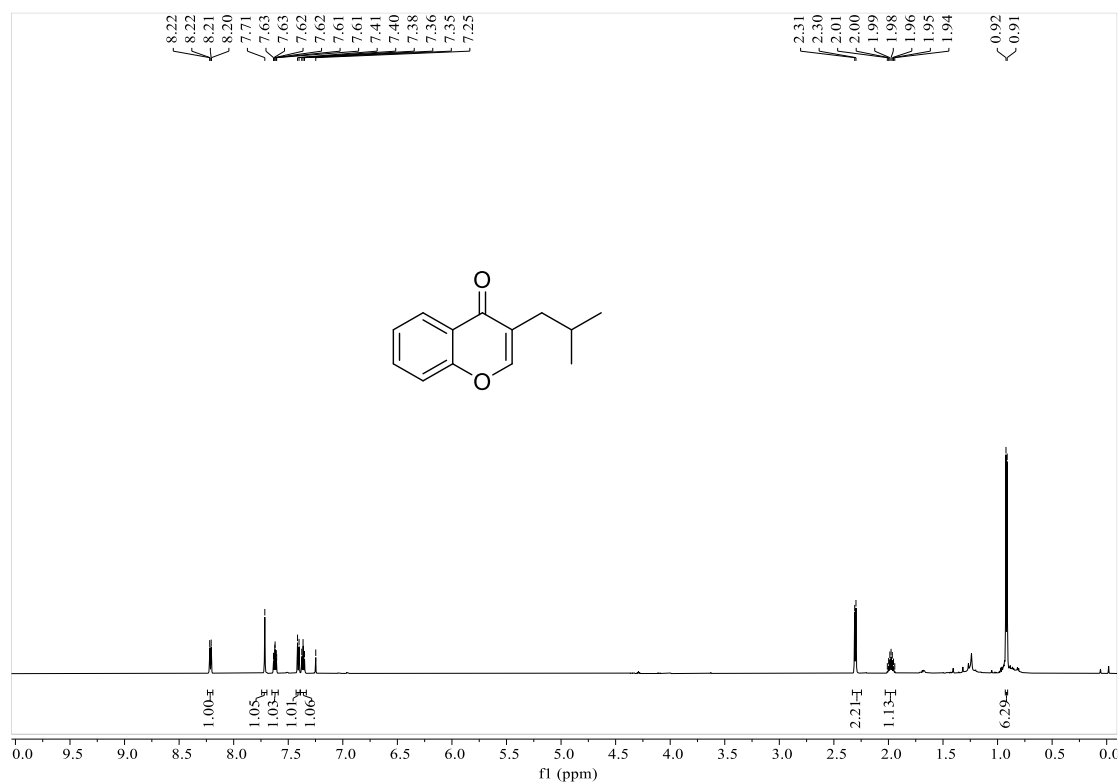

<sup>1</sup>H NMR (600 MHz, Chloroform-*d*)

3-Benzyl-6-methylchroman-4-one (**2p**)

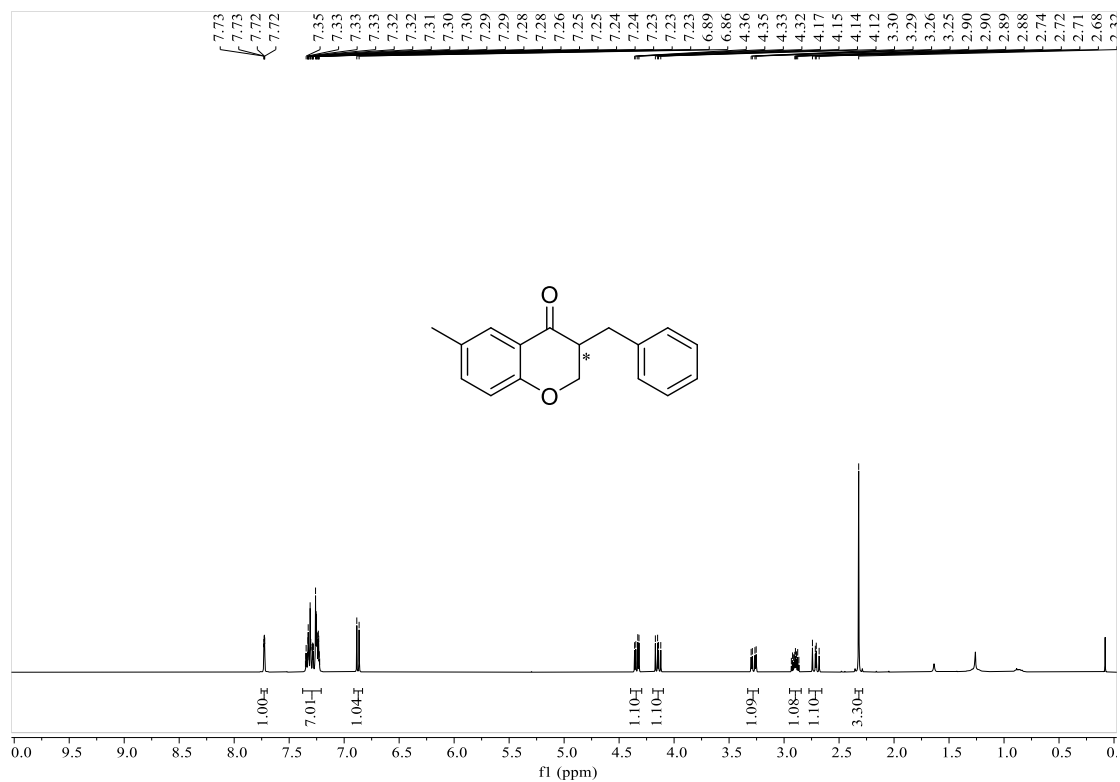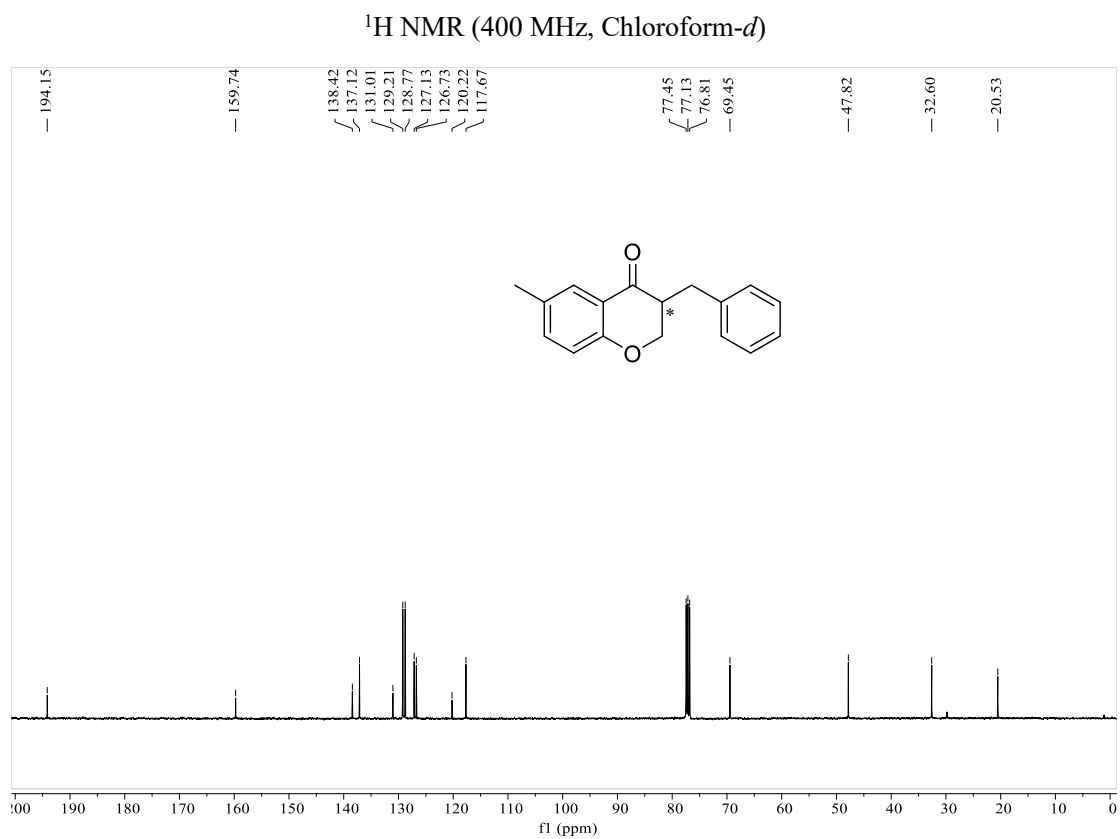

**(R)-2-Benzyl-3,4-dihydronaphthalen-1(2H)-one (2q)**

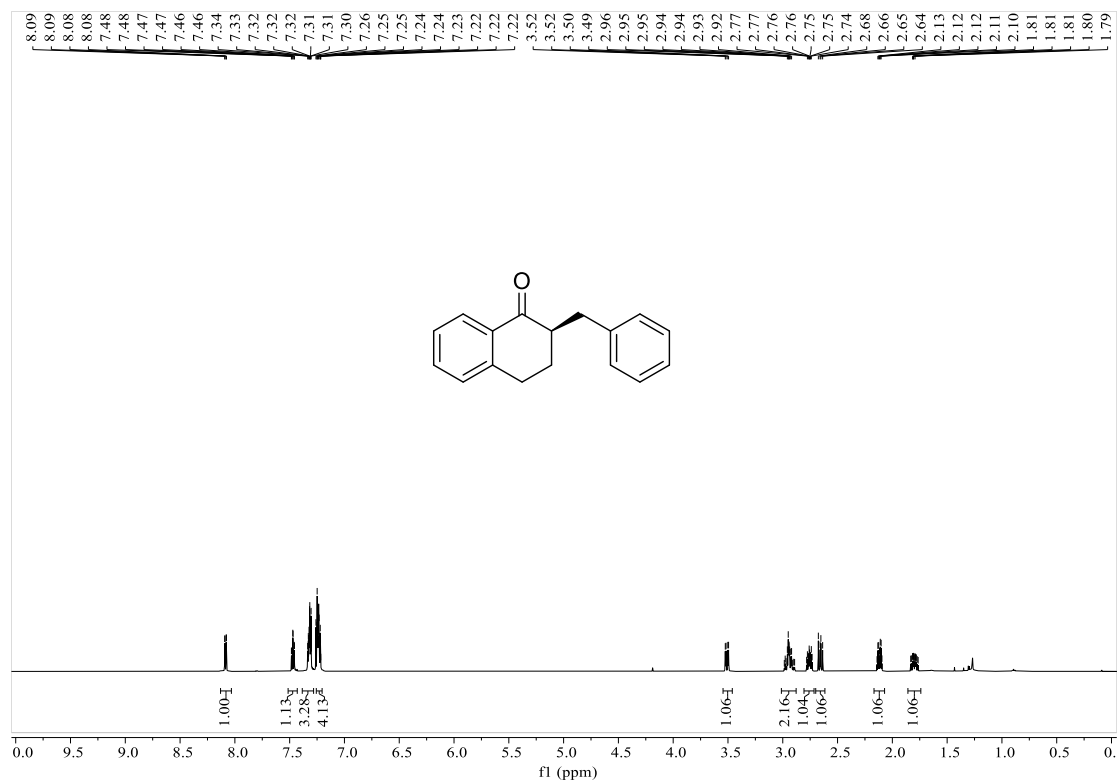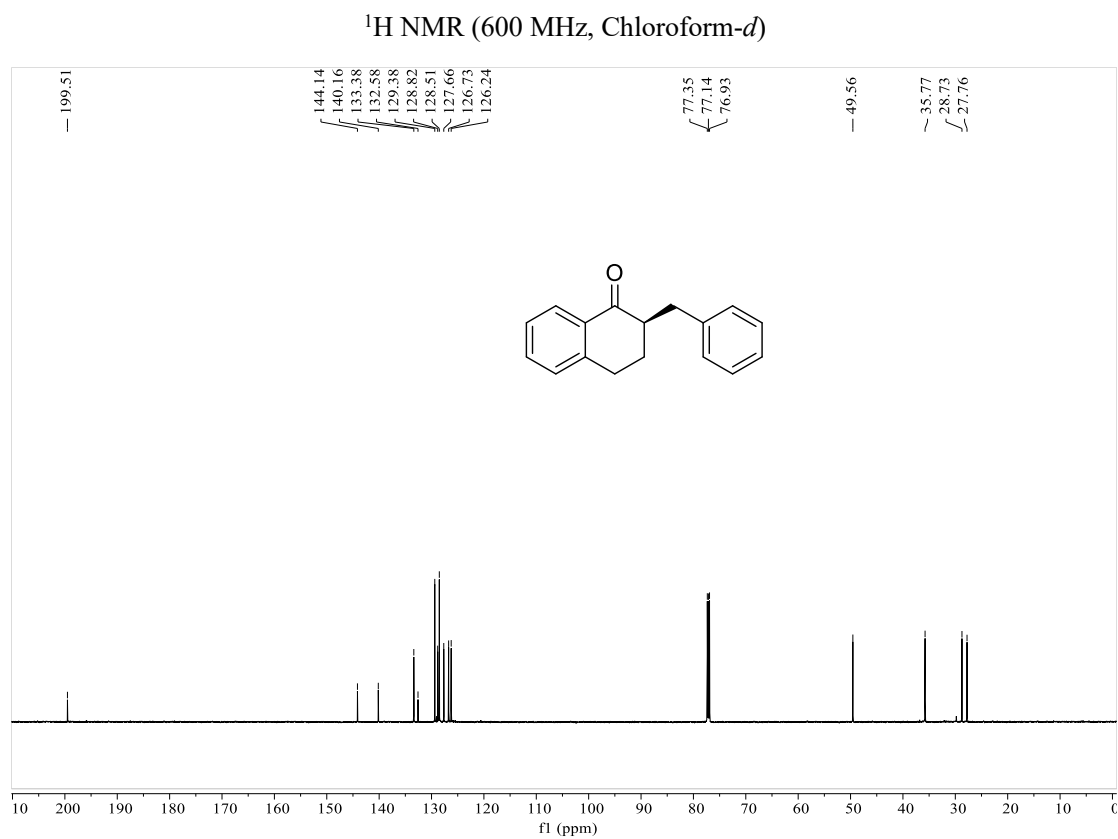

(*R*)-2-Benzylcyclohexan-1-one (**2r**)

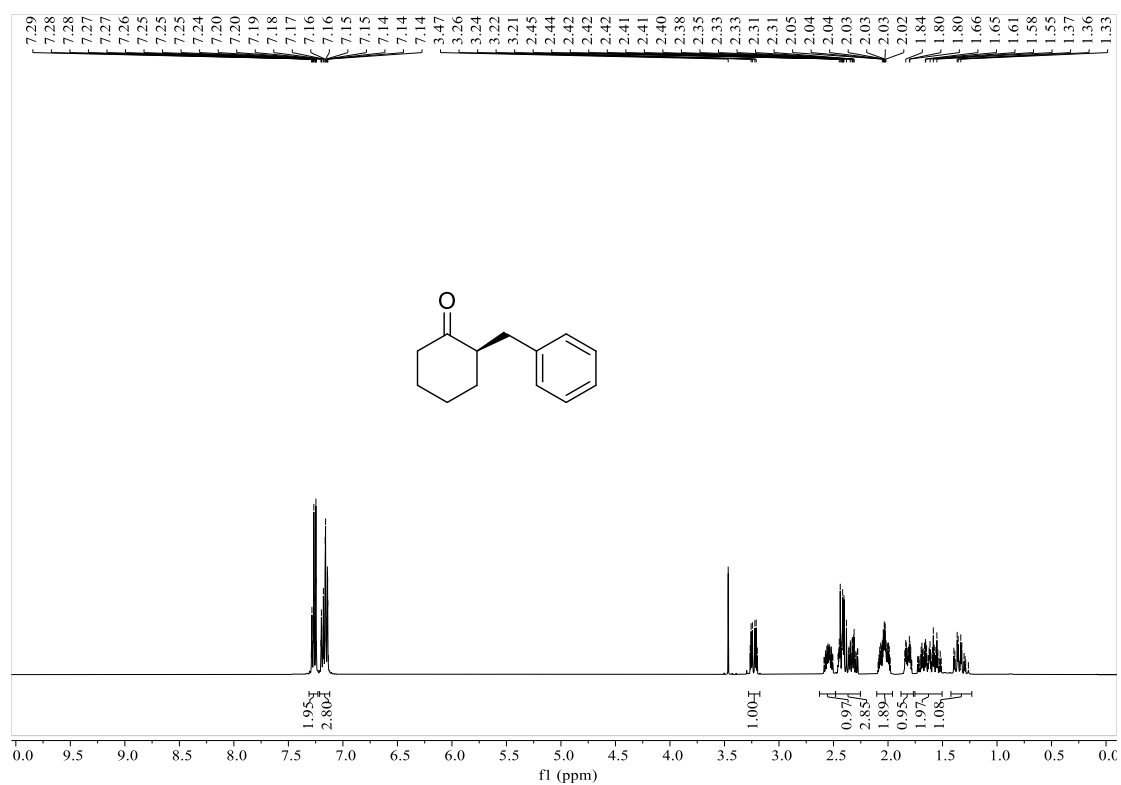

<sup>1</sup>H NMR (400 MHz, Chloroform-*d*)

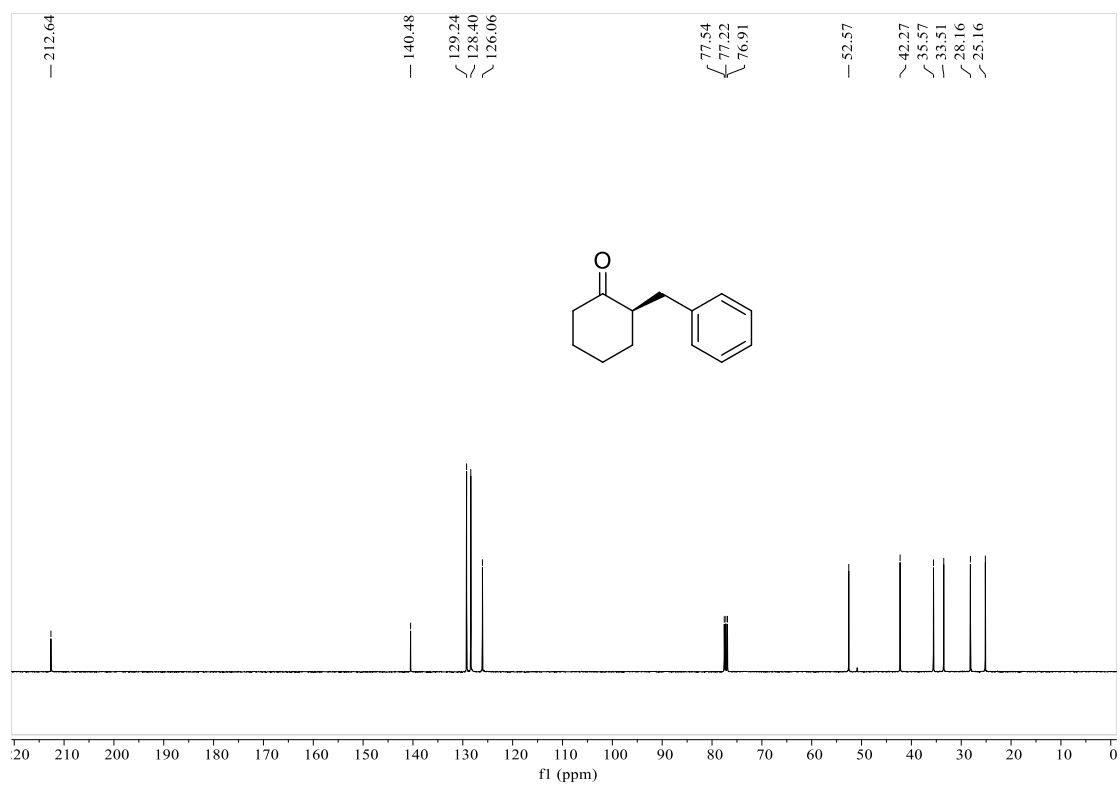

<sup>13</sup>C NMR (101 MHz, Chloroform-*d*)

2-Benzyl-2,3-dihydro-1*H*-inden-1-one (**2s**)

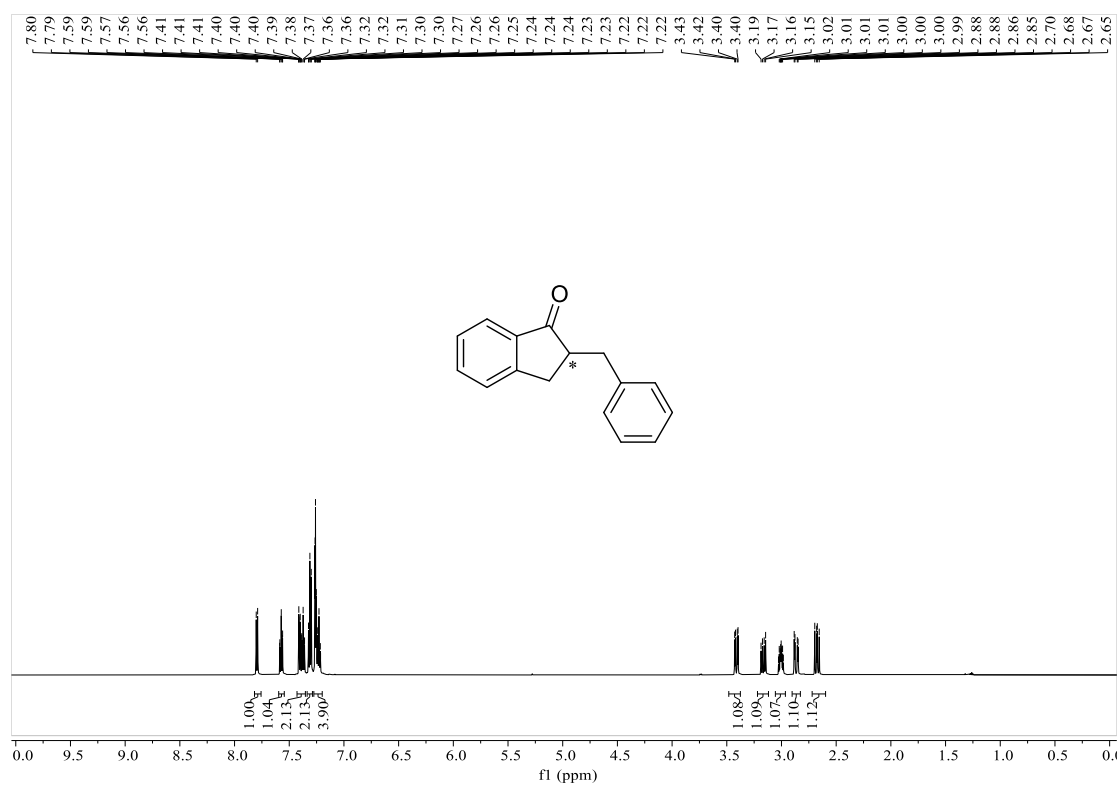

<sup>1</sup>H NMR (600 MHz, Chloroform-*d*)

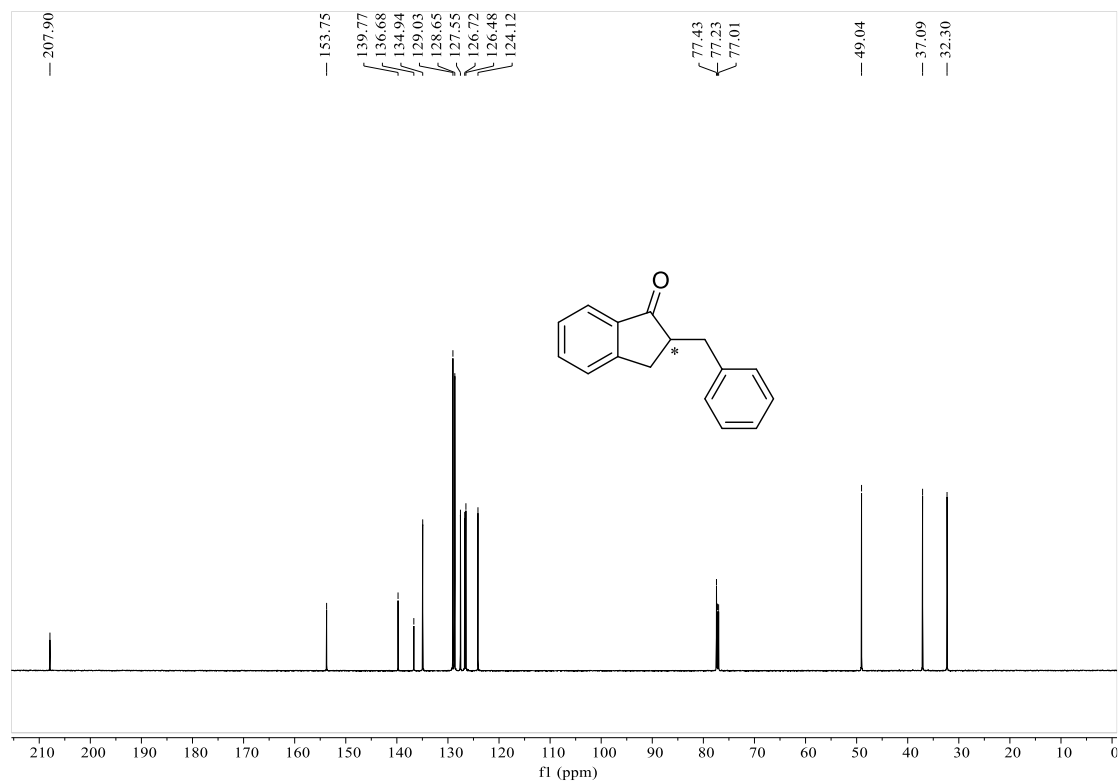

<sup>13</sup>C NMR (151 MHz, Chloroform-*d*)

(S)-2-Benzylcyclopentan-1-one (**2t**)

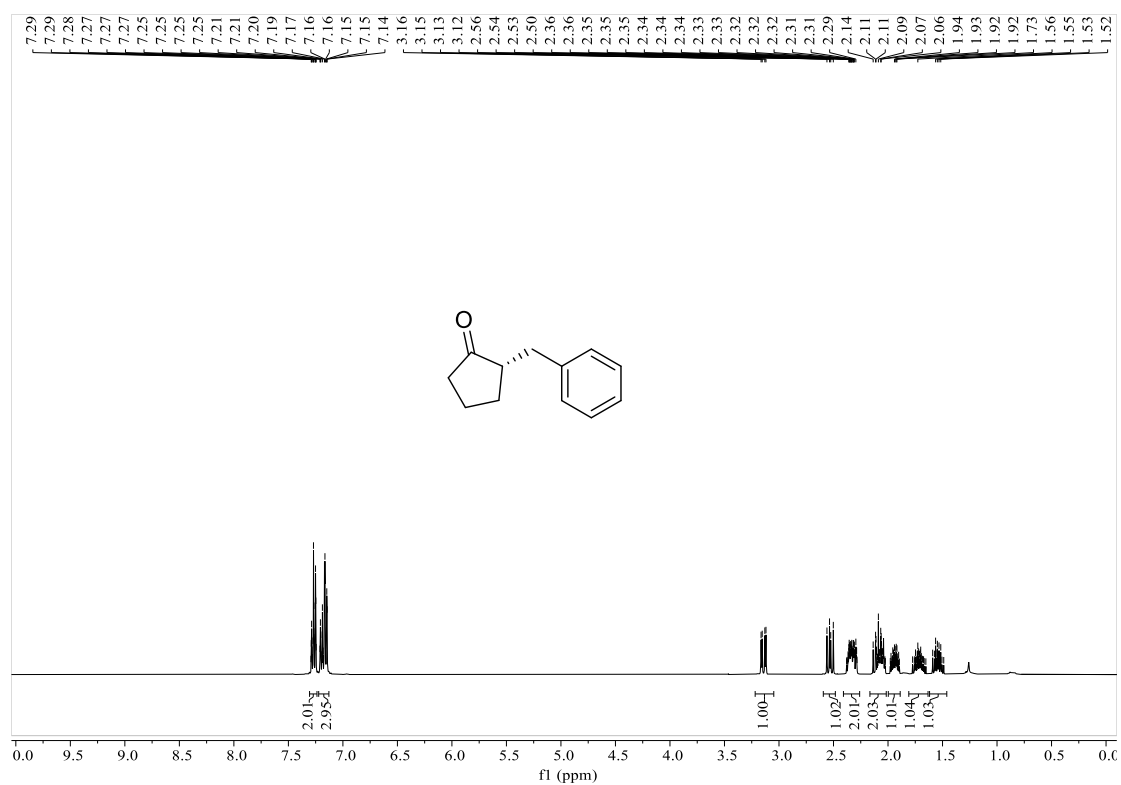

<sup>1</sup>H NMR (400 MHz, Chloroform-*d*)

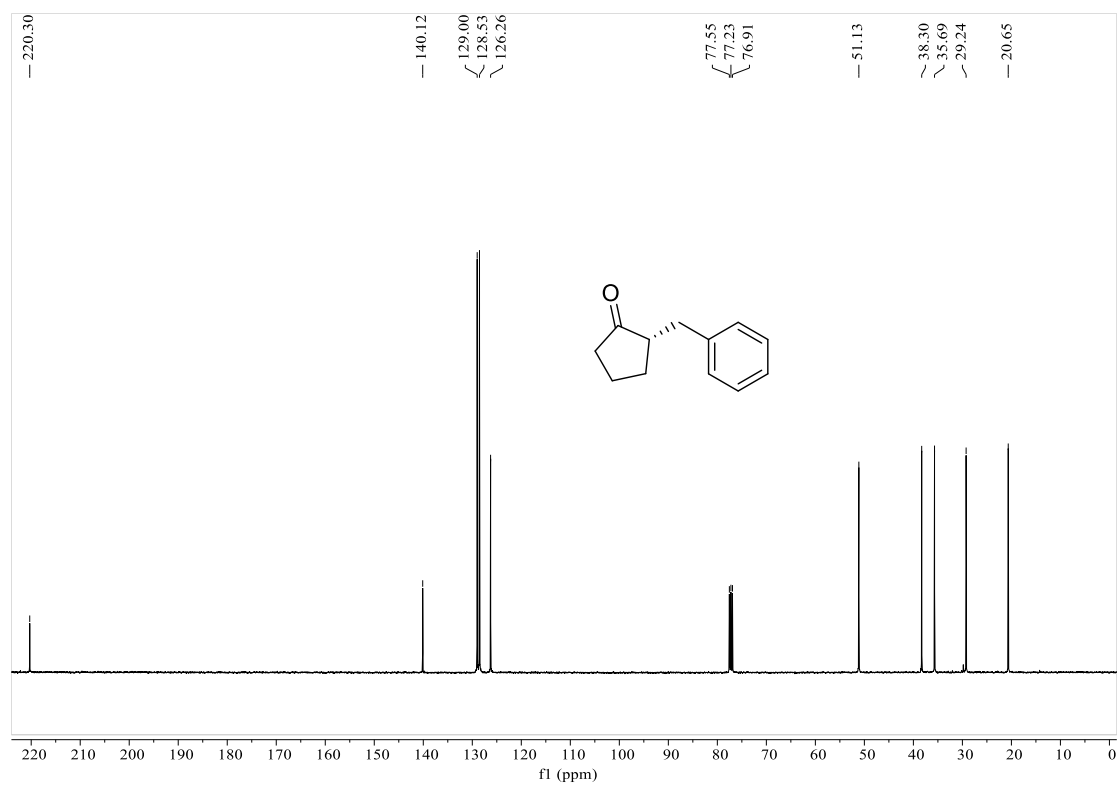

<sup>13</sup>C NMR (101 MHz, Chloroform-*d*)

*(R)*-2-Methyl-1,3-diphenylpropan-1-one (**2u**)

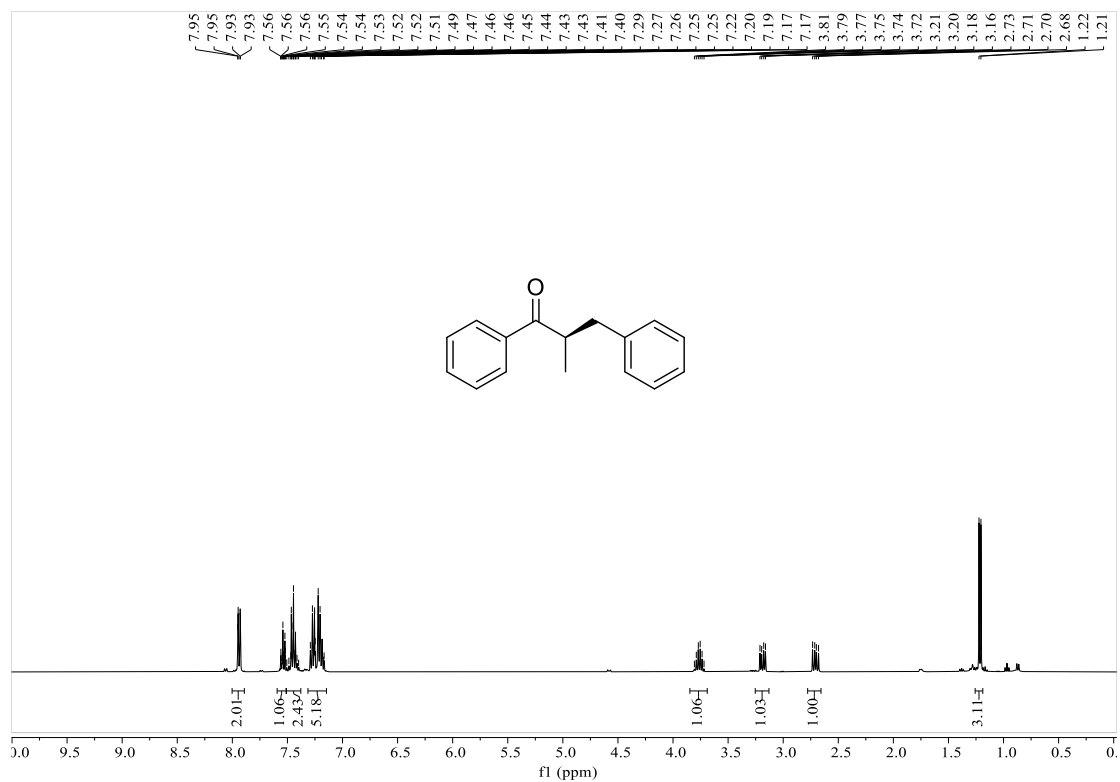

<sup>1</sup>H NMR (400 MHz, Chloroform-*d*)

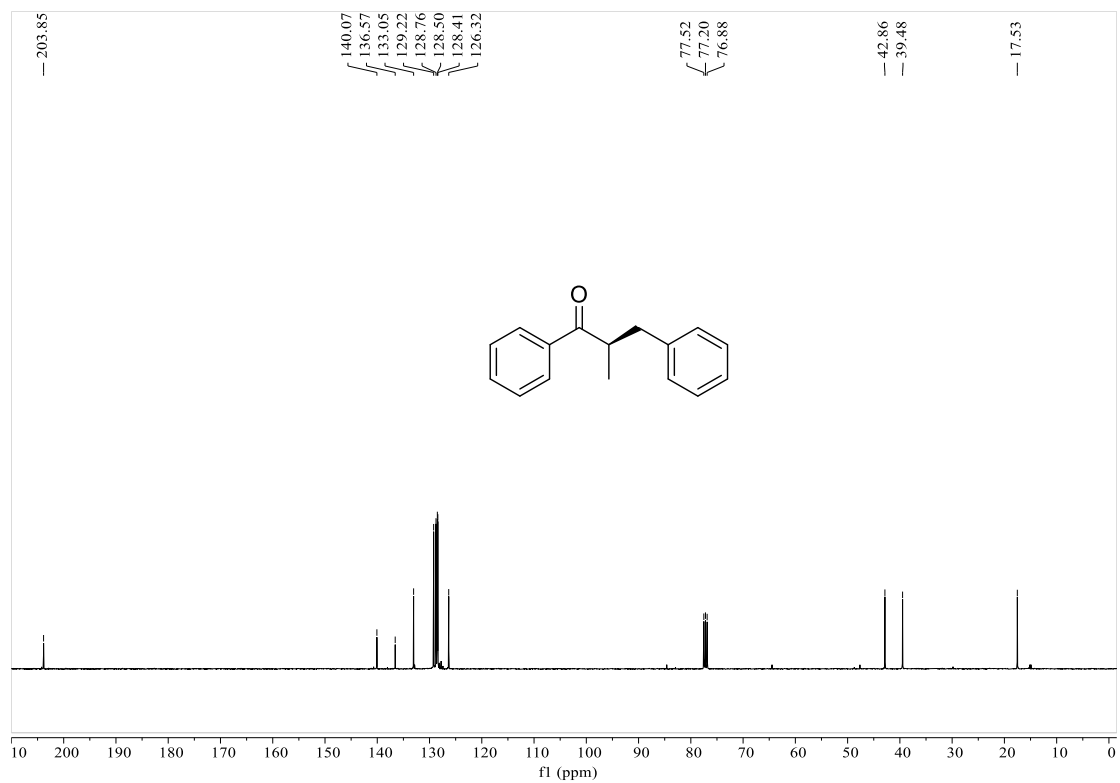

<sup>13</sup>C NMR (101 MHz, Chloroform-*d*)



3,5-dibenzyltetrahydro-4H-pyran-4-one (**4a**)

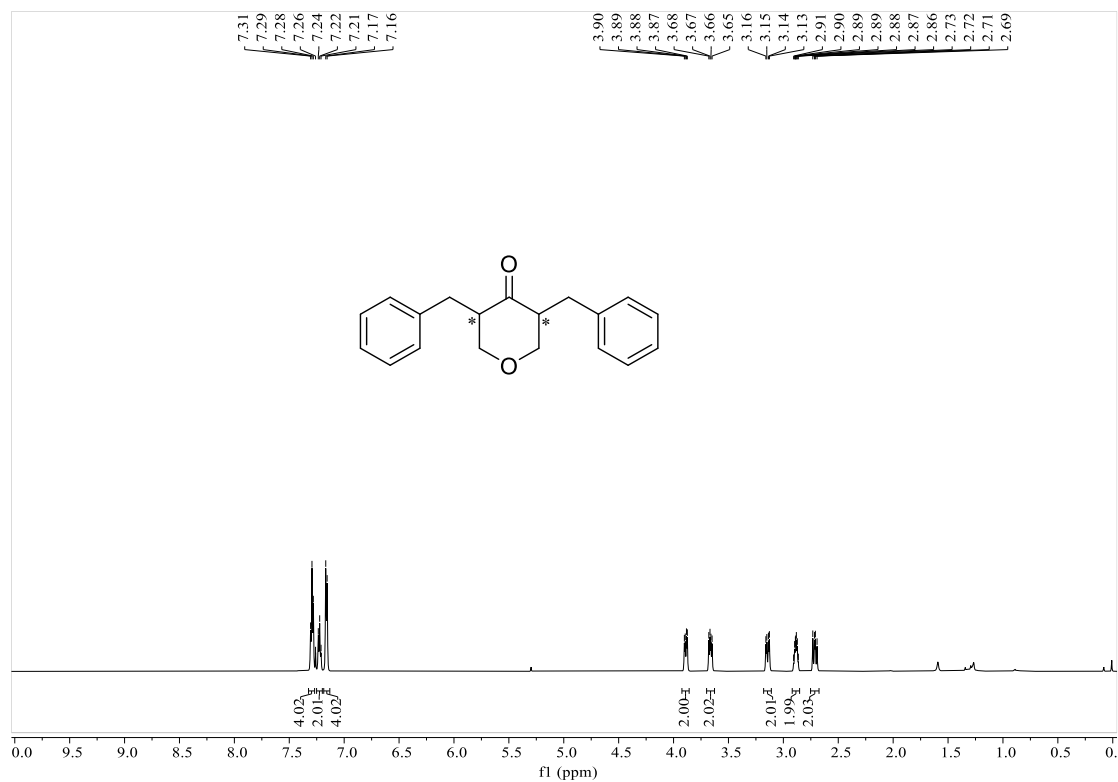

<sup>1</sup>H NMR (600 MHz, Chloroform-*d*)

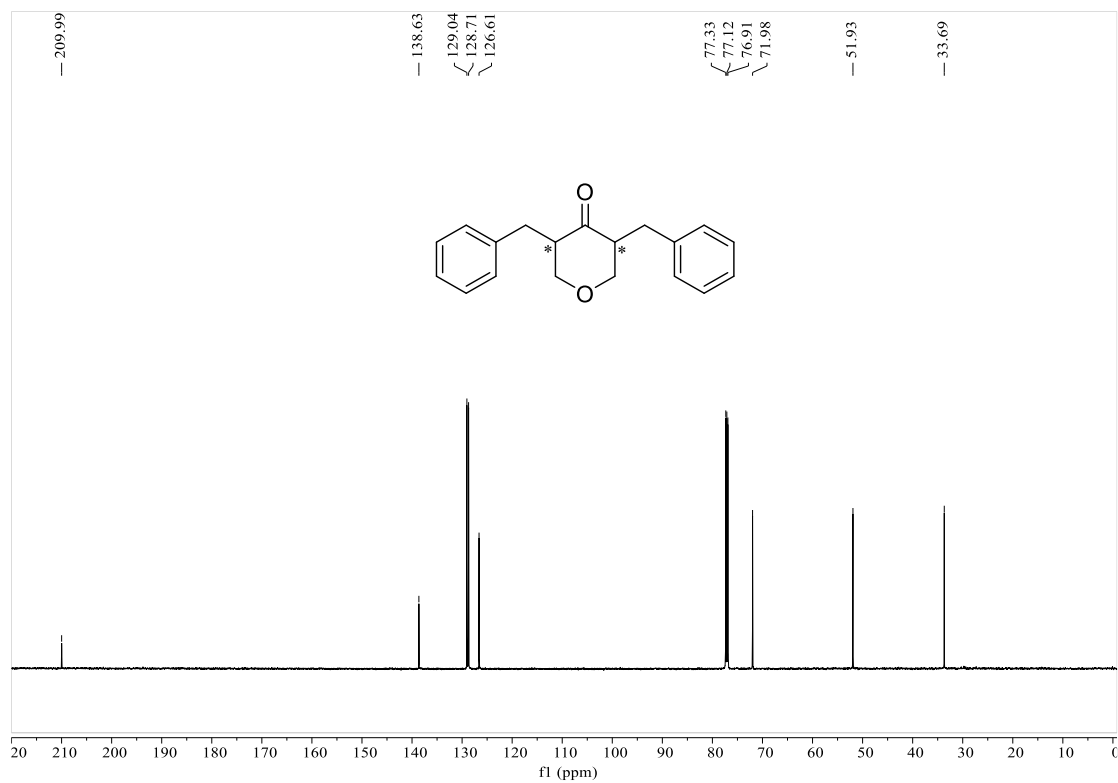

<sup>13</sup>C NMR (151 MHz, Chloroform-*d*)

3,5-bis(4-methylbenzyl)tetrahydro-4H-pyran-4-one (**4b**)

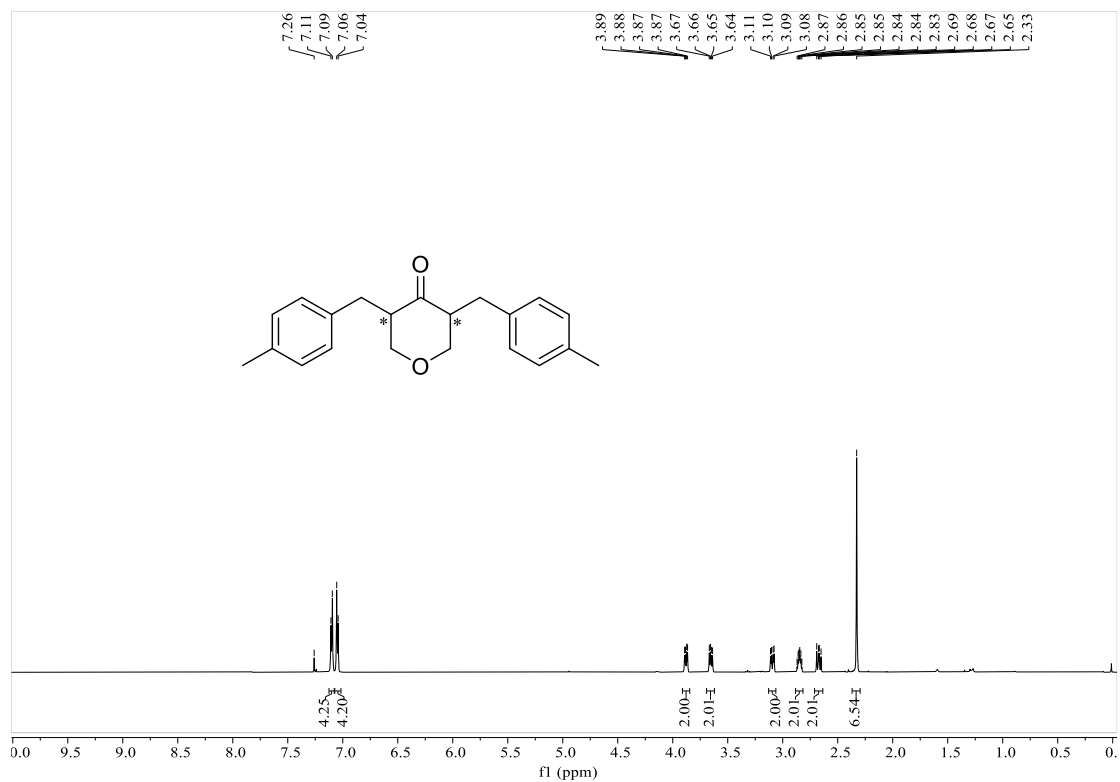

<sup>1</sup>H NMR (600 MHz, Chloroform-*d*)

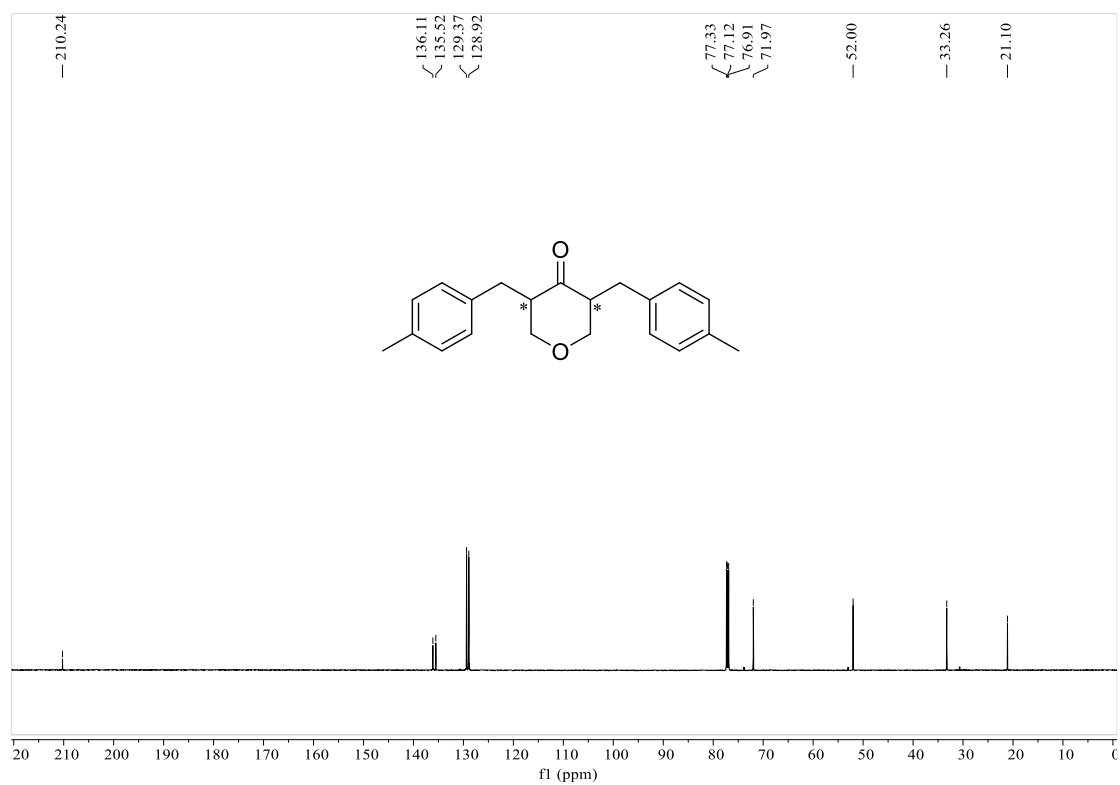

<sup>13</sup>C NMR (151 MHz, Chloroform-*d*)

(+)-(2*R*,6*R*)-2,6-Dibenzylcyclohexan-1-one (**4c**)

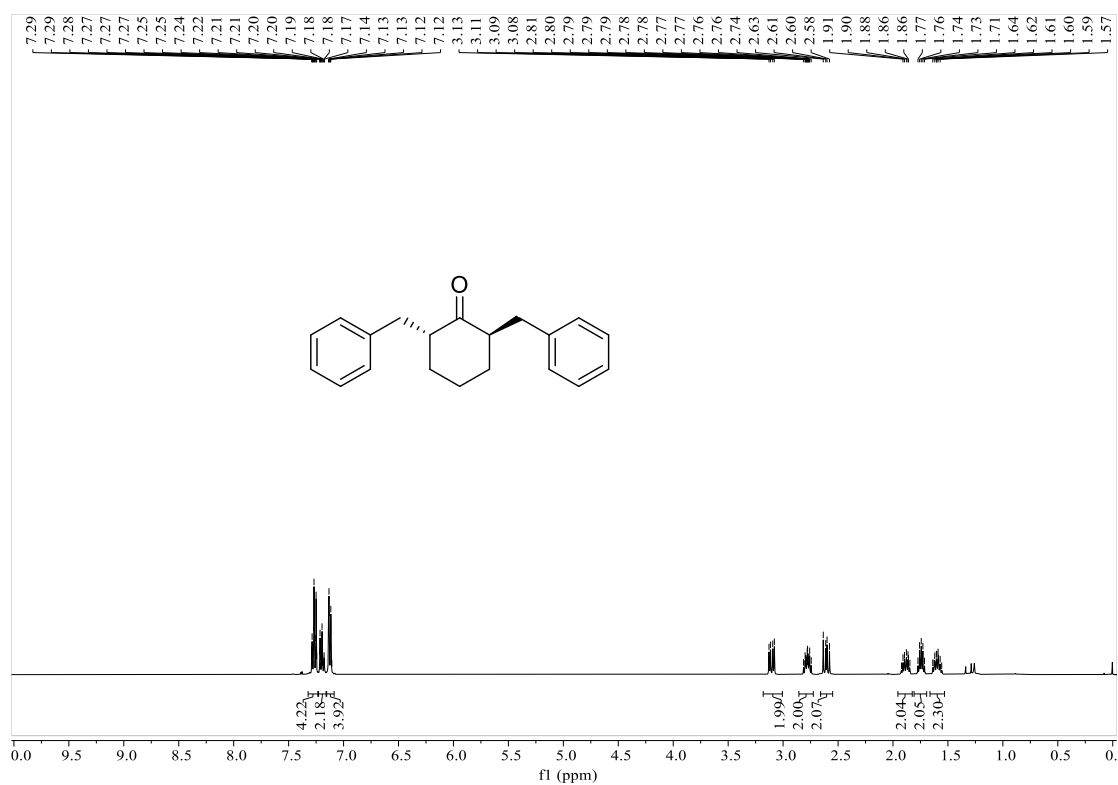

<sup>1</sup>H NMR (400 MHz, Chloroform-*d*)

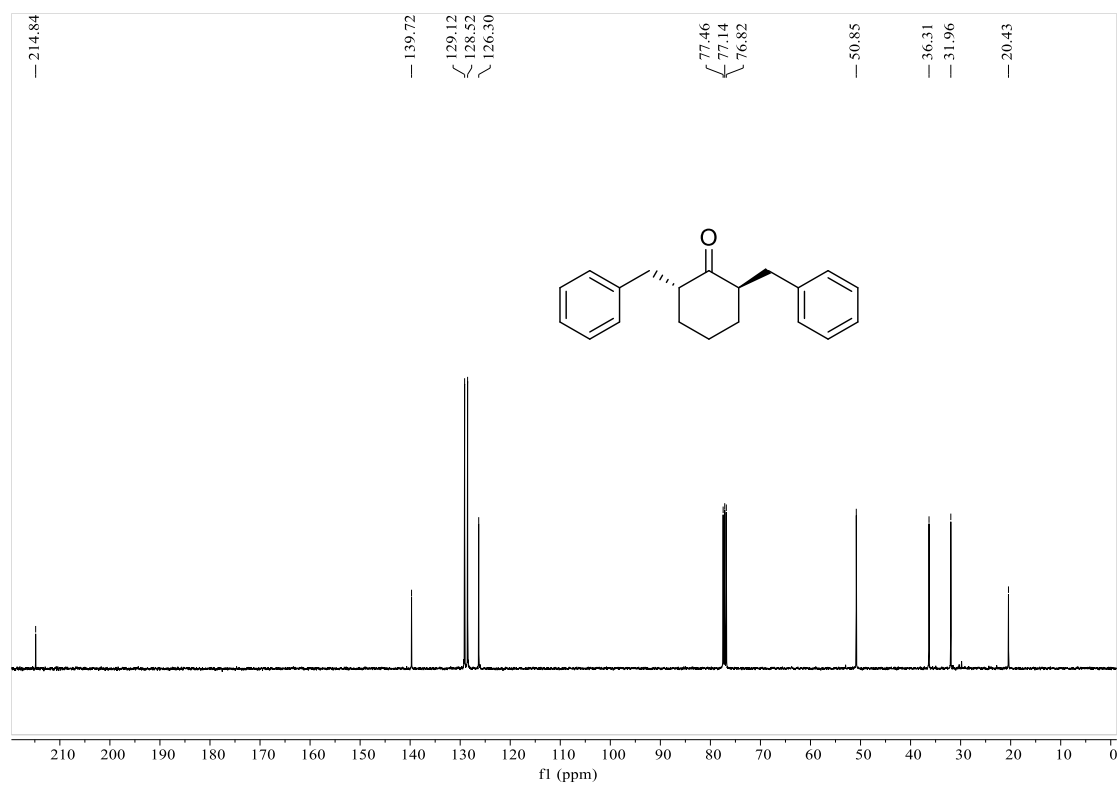

<sup>13</sup>C NMR (101 MHz, Chloroform-*d*)

(+)-(2*R*,6*R*)-2,6-Bis(3-methylbenzyl)cyclohexan-1-one (**4d**)

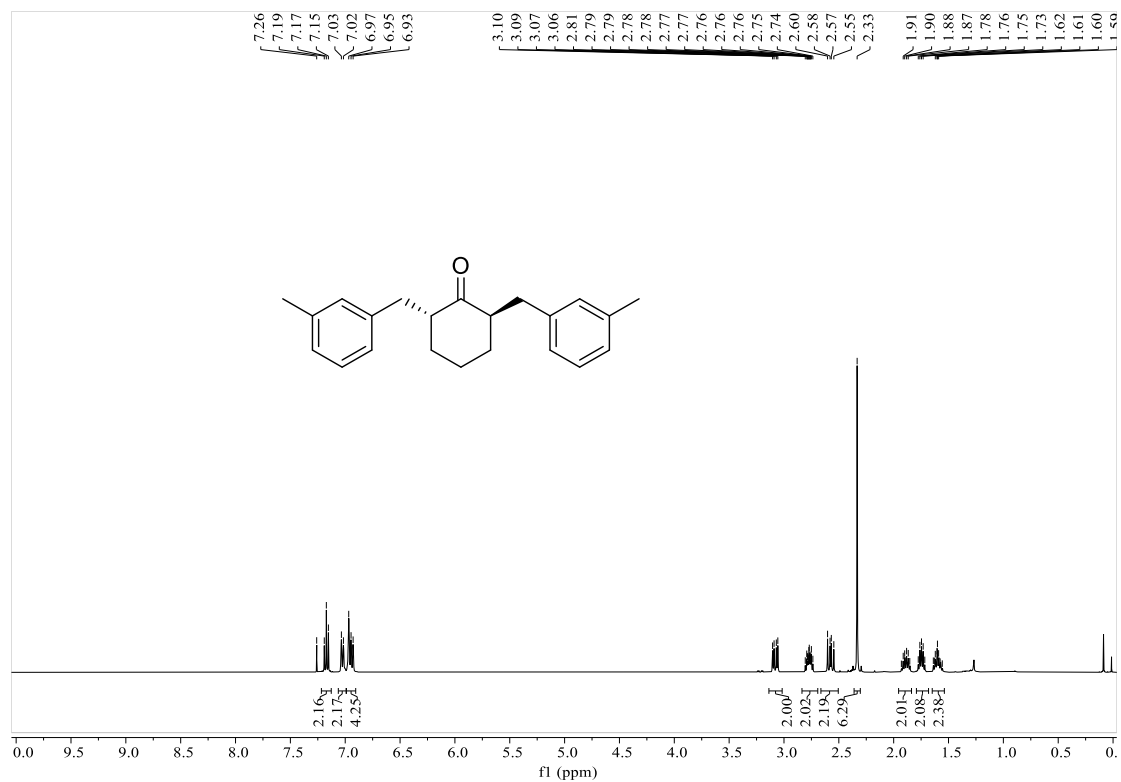

<sup>1</sup>H NMR (400 MHz, Chloroform-*d*)

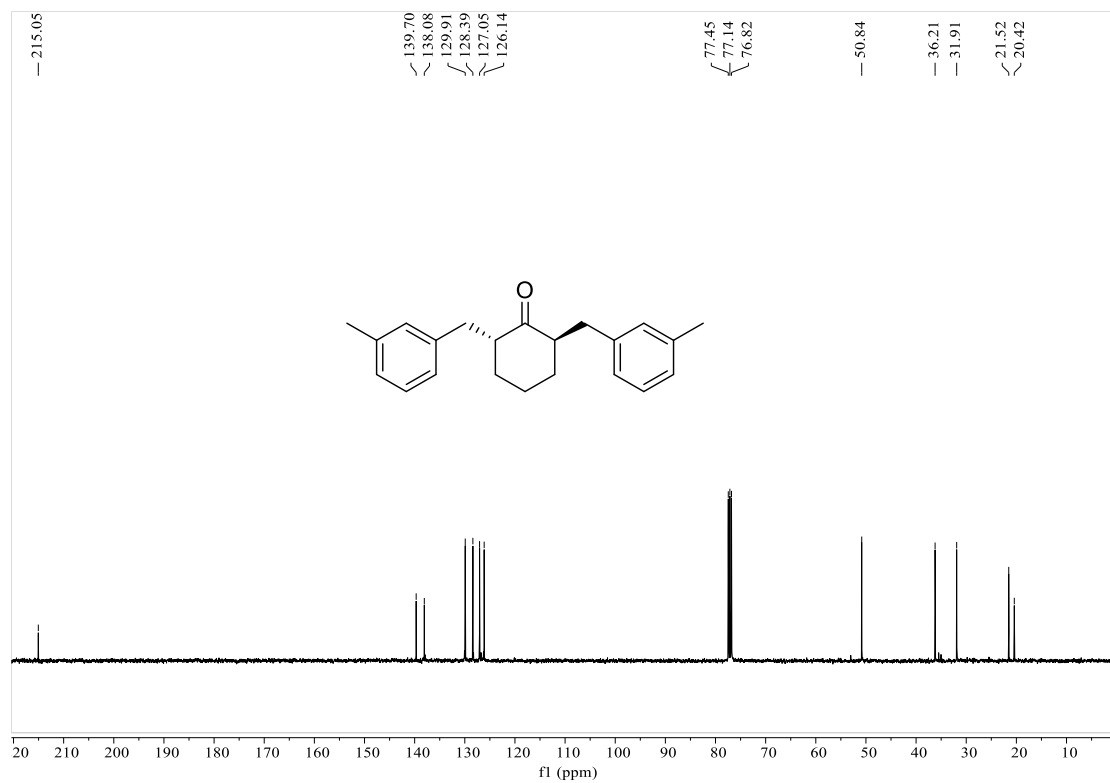

<sup>13</sup>C NMR (101 MHz, Chloroform-*d*)

2,6-Bis(3-fluorobenzyl)cyclohexan-1-one (**4e**)

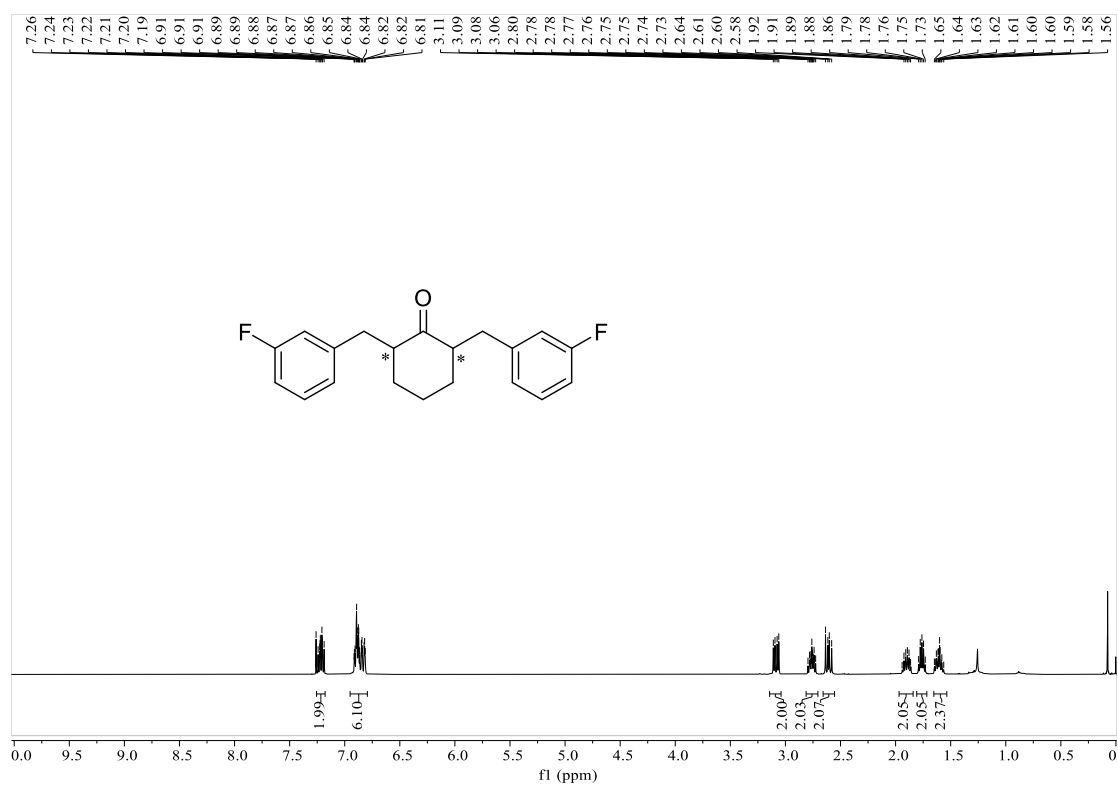

**<sup>1</sup>H NMR (400 MHz, Chloroform-*d*)**

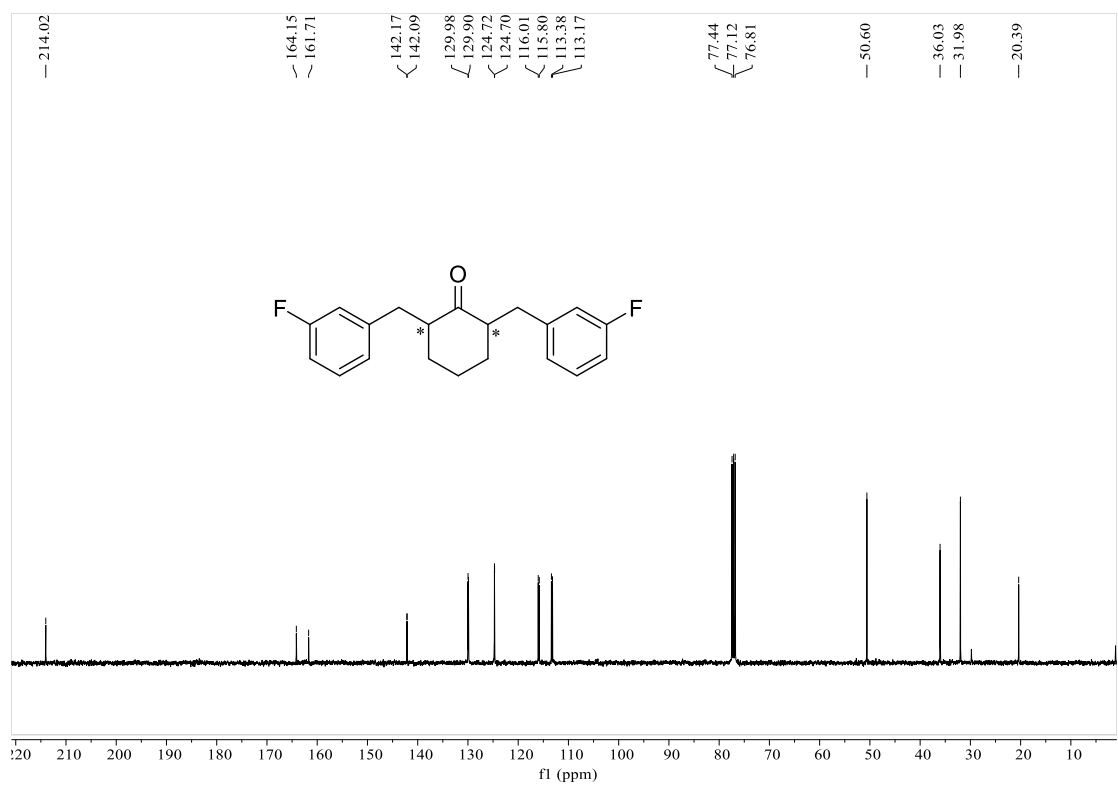

**<sup>13</sup>C NMR (101 MHz, Chloroform-*d*)**

(+)-(2*R*,6*R*)-2,6-Bis(4-methylbenzyl)cyclohexan-1-one (**4f**)

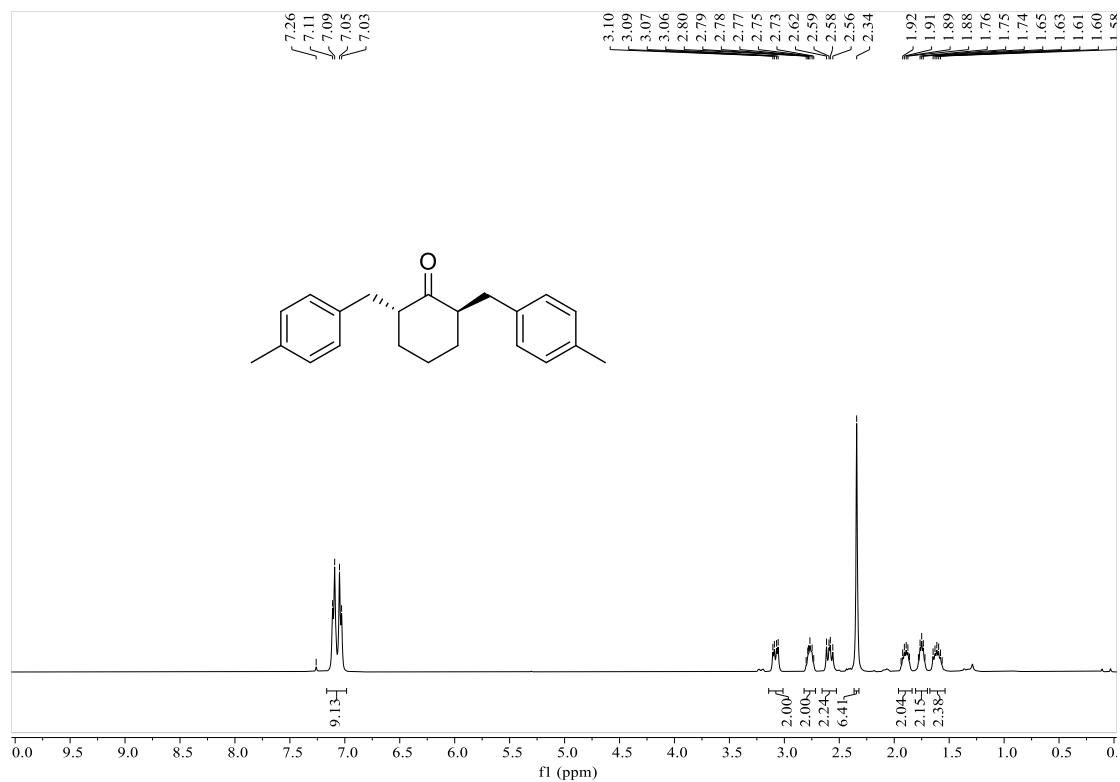

<sup>1</sup>H NMR (400 MHz, Chloroform-*d*)

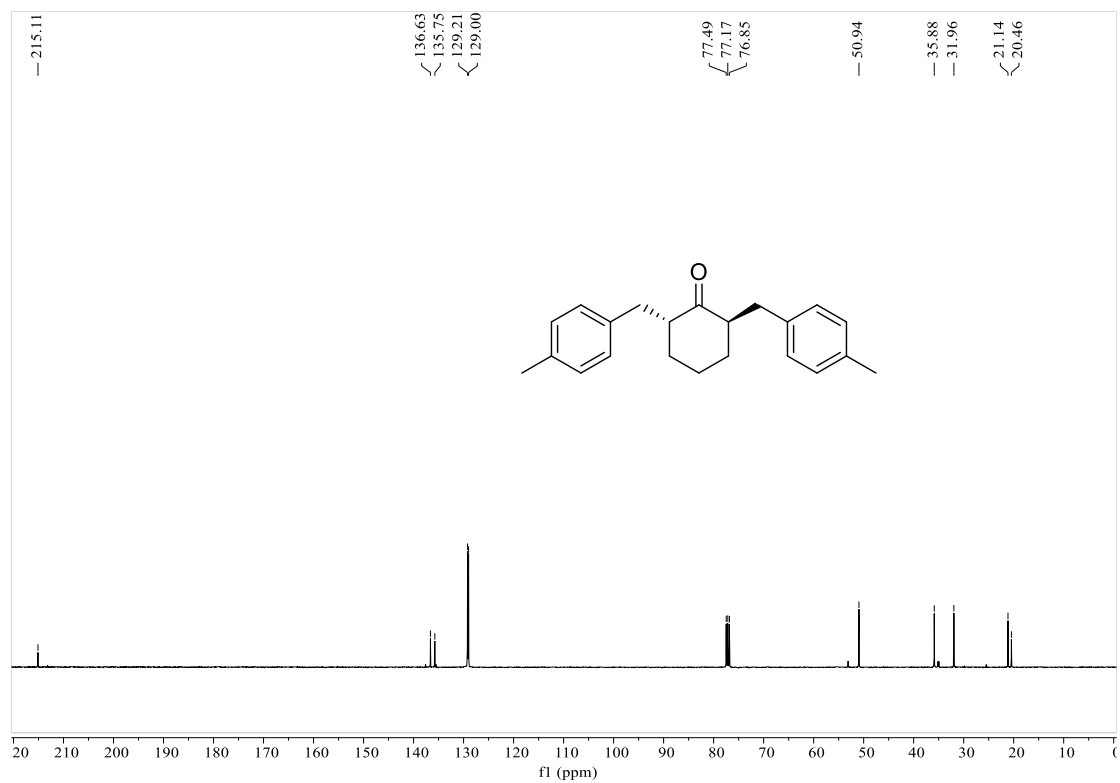

<sup>13</sup>C NMR (101 MHz, Chloroform-*d*)

2,6-Bis(2-fluorobenzyl)cyclohexan-1-one (**4g**)

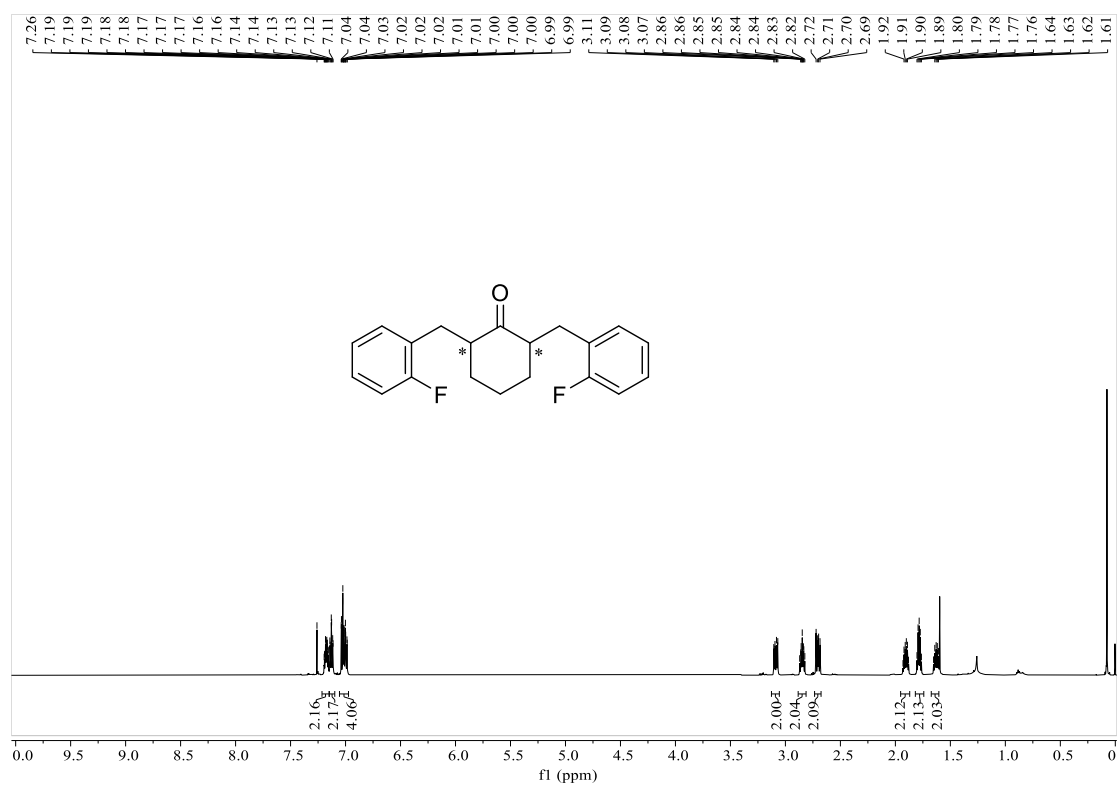

**<sup>1</sup>H NMR (600 MHz, Chloroform-*d*)**

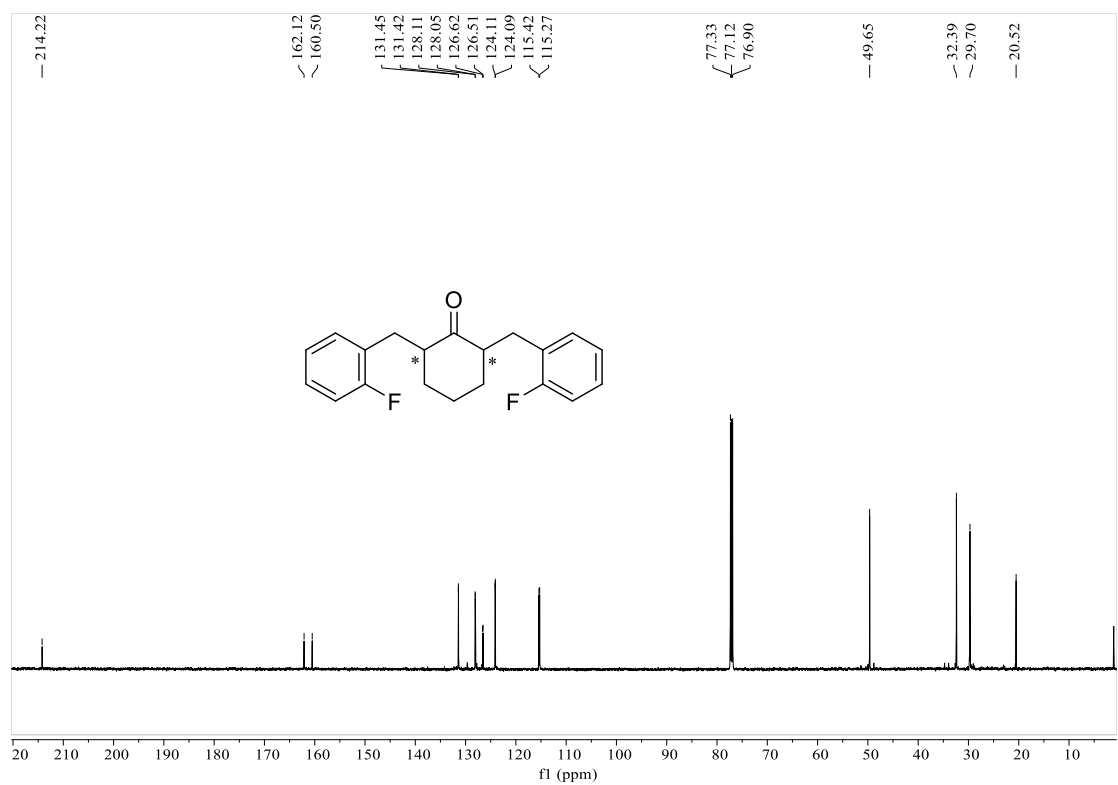

**<sup>13</sup>C NMR (151 MHz, Chloroform-*d*)**

2,6-Bis(3,4-dichlorobenzyl)cyclohexan-1-one (**4h**)

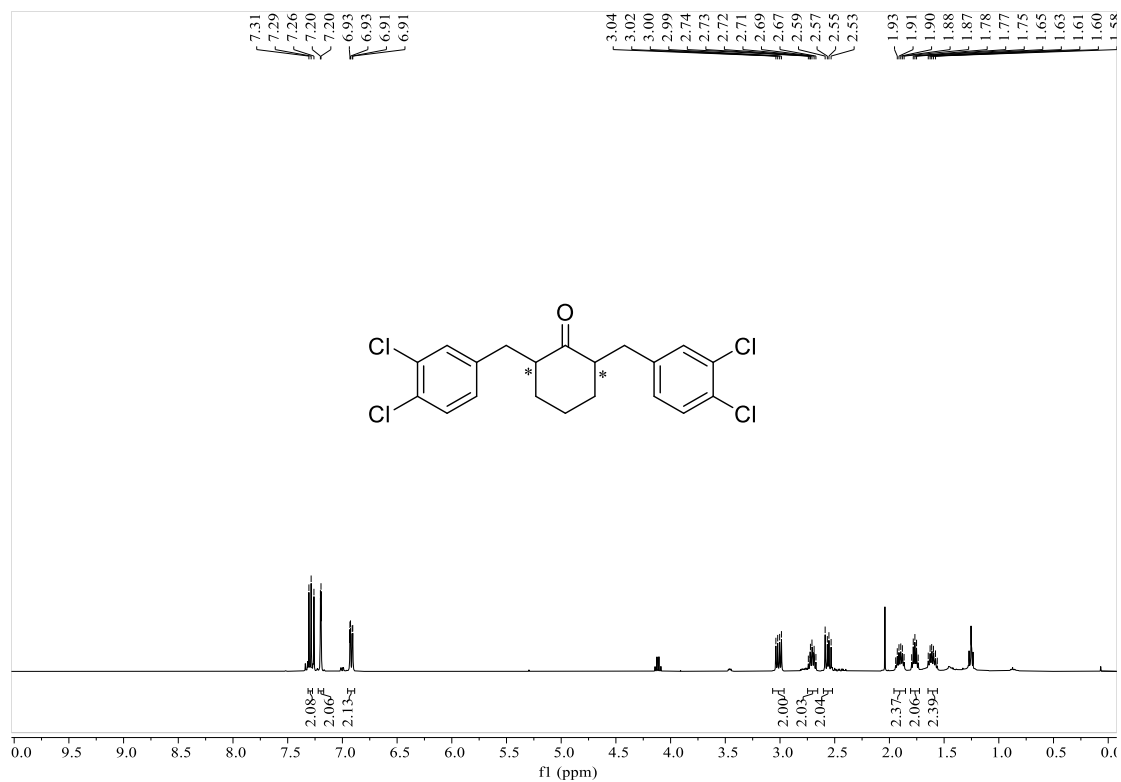

**<sup>1</sup>H NMR (400 MHz, Chloroform-*d*)**

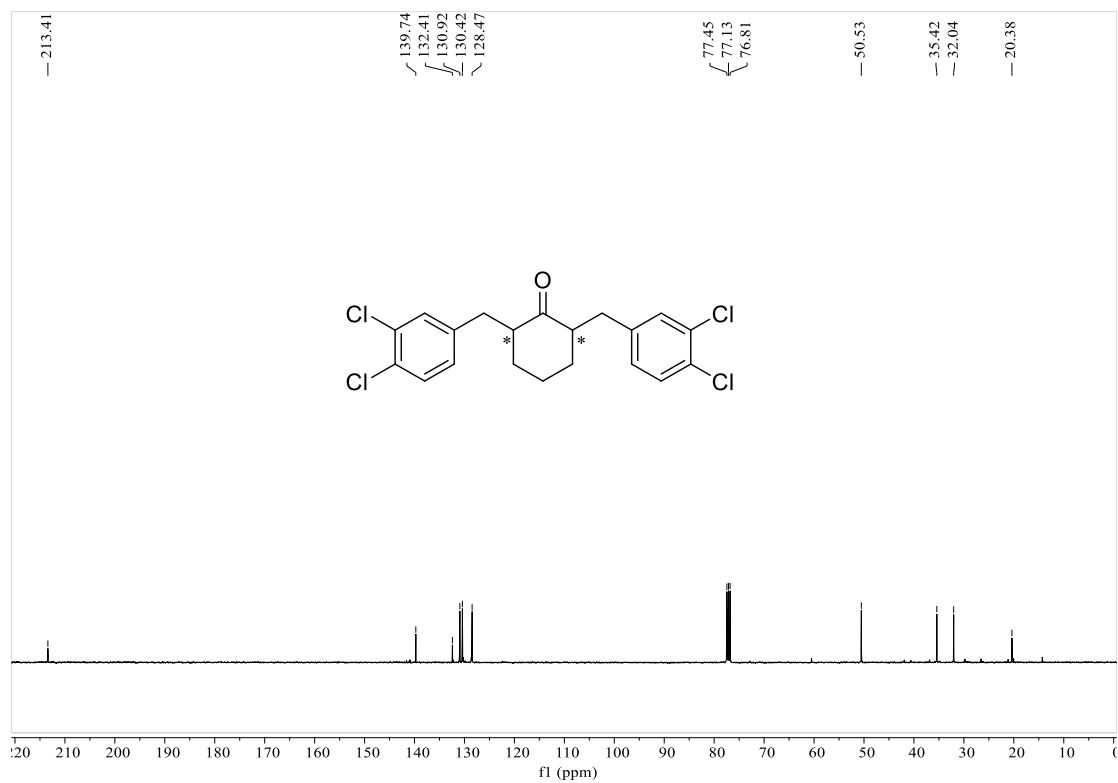

**<sup>13</sup>C NMR (101 MHz, Chloroform-*d*)**



2,6-Bis(furan-2-ylmethyl)cyclohexan-1-one (**4i**)

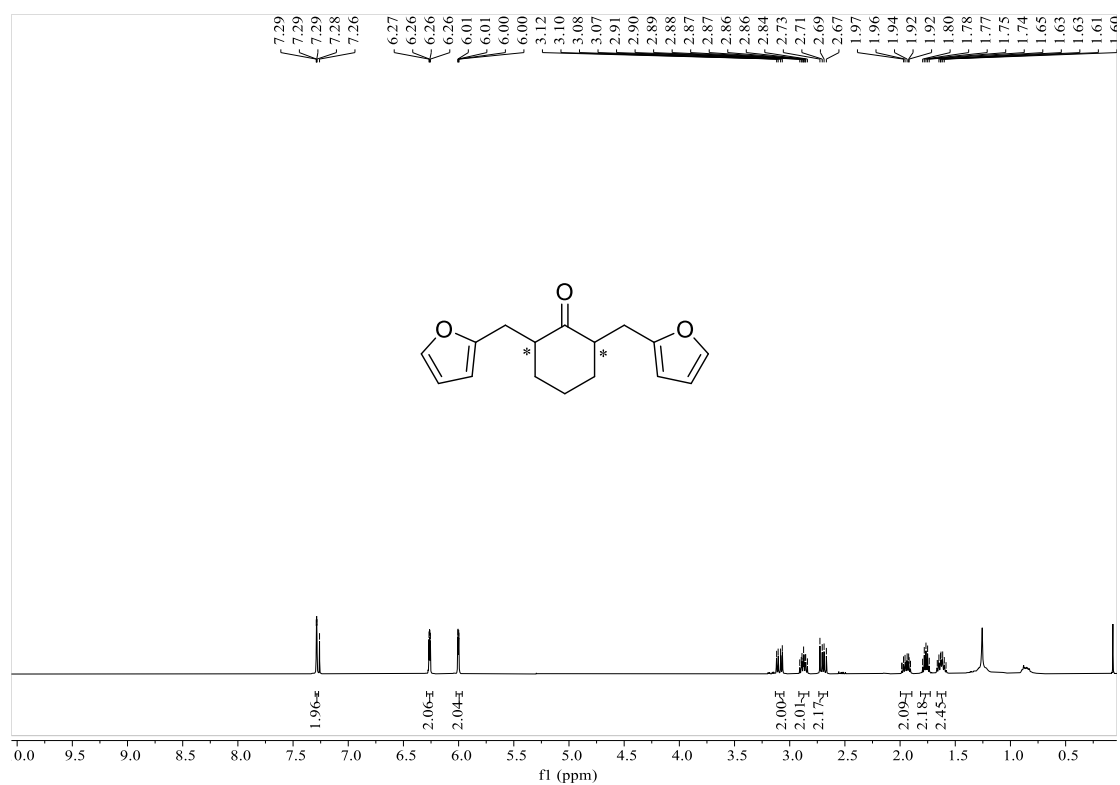

<sup>1</sup>H NMR (400 MHz, Chloroform-*d*)

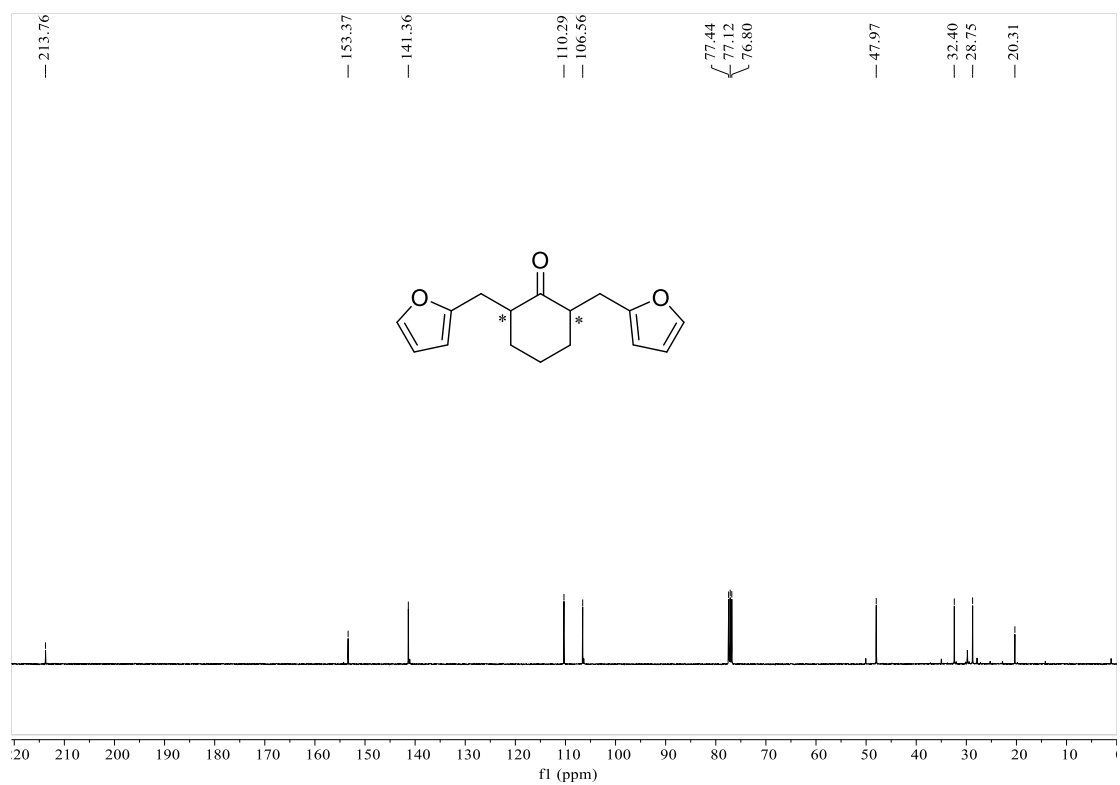

<sup>13</sup>C NMR (101 MHz, Chloroform-*d*)

(3*S*,4*S*)-3-Benzylchroman-4-ol (**5**)

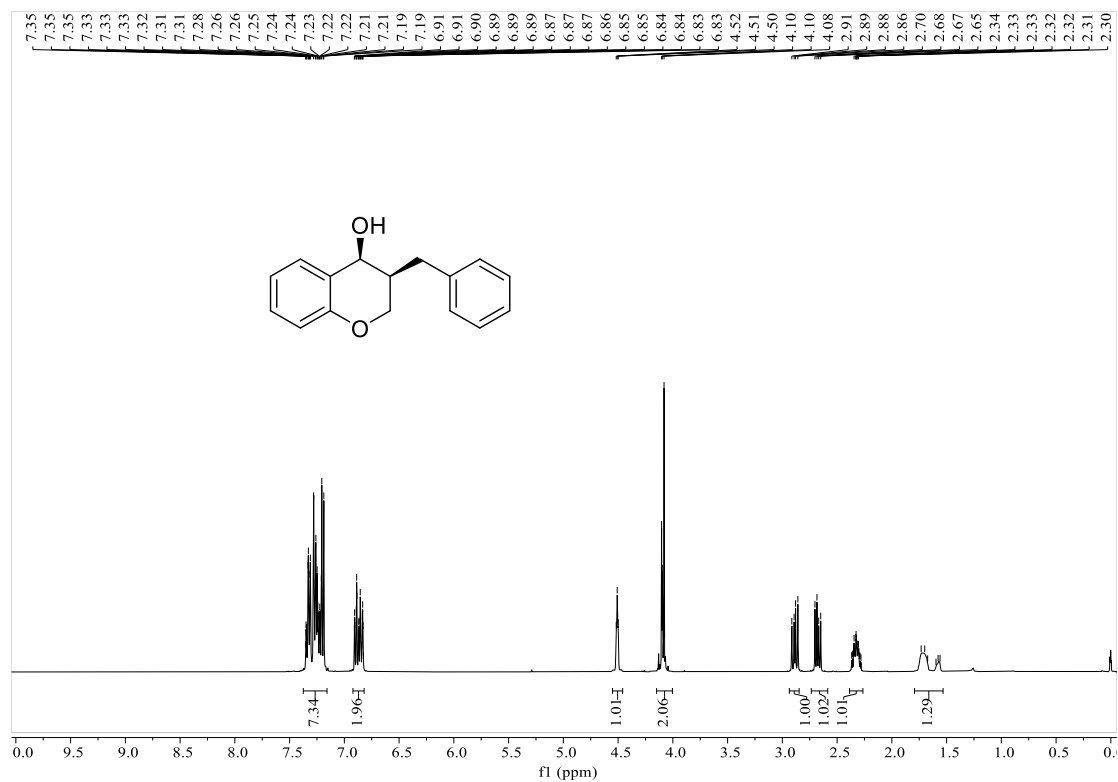

<sup>1</sup>H NMR (400 MHz, Chloroform-*d*)

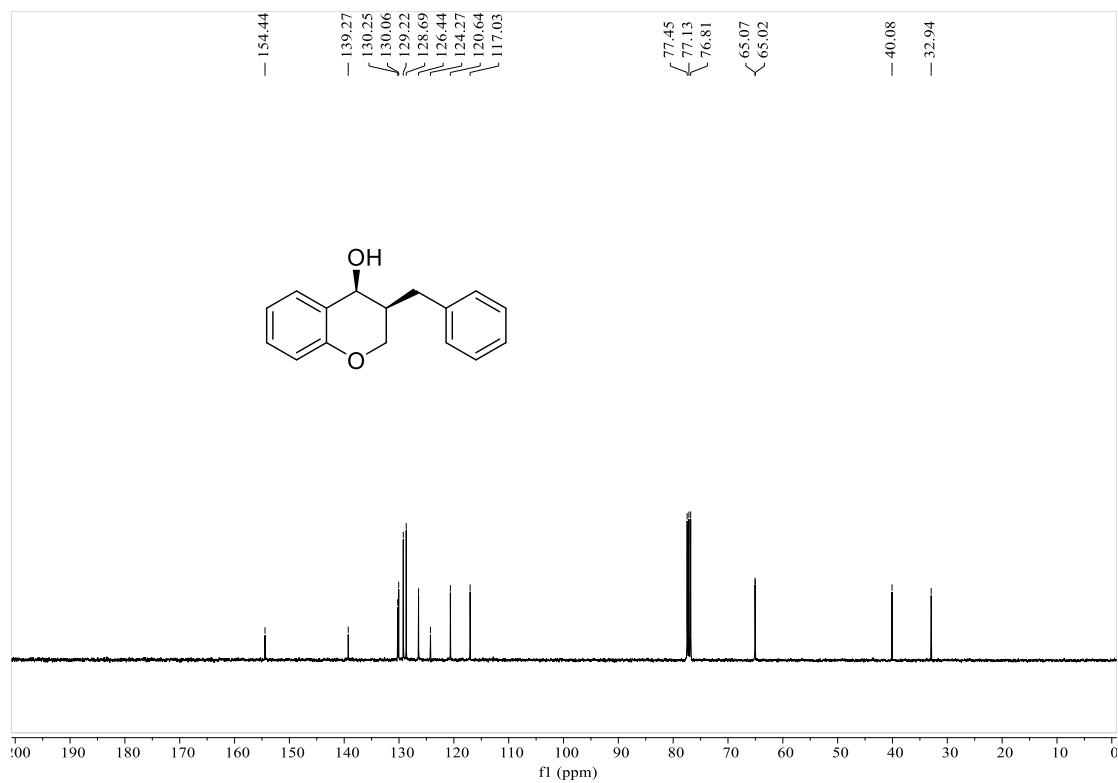

<sup>13</sup>C NMR (101 MHz, Chloroform-*d*)

(*R,E*)-3-benzylchroman-4-one oxime (**6**)

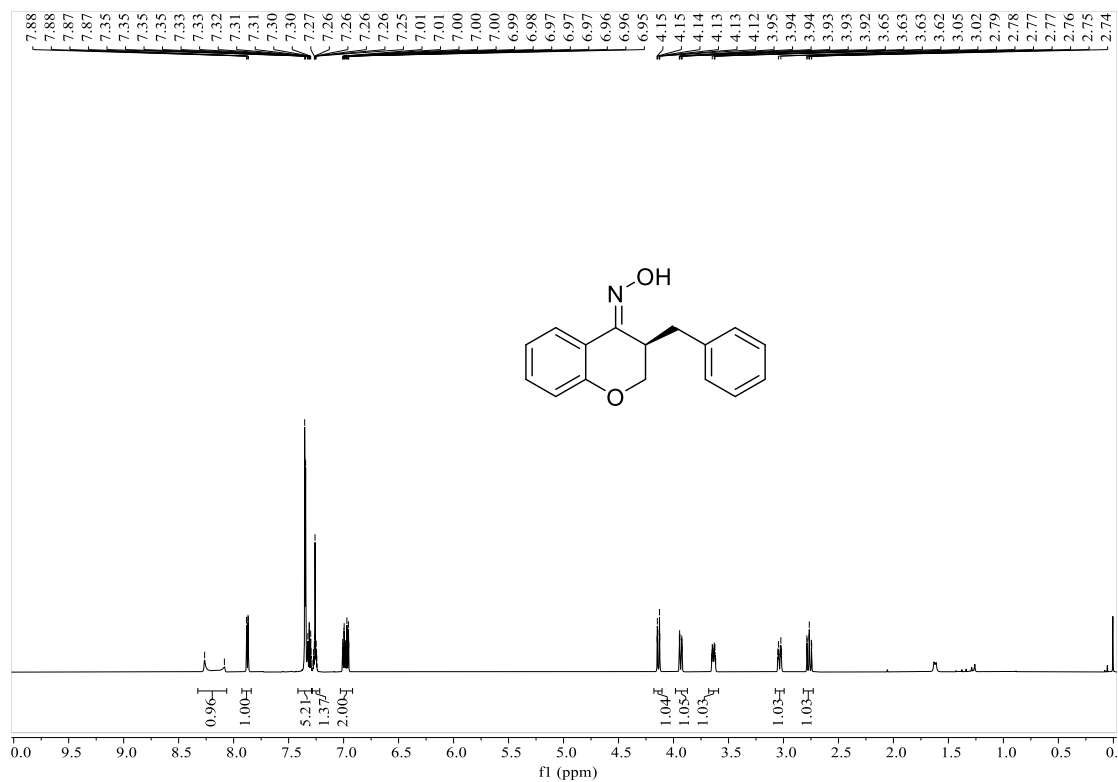

<sup>1</sup>H NMR (600 MHz, Chloroform-*d*)

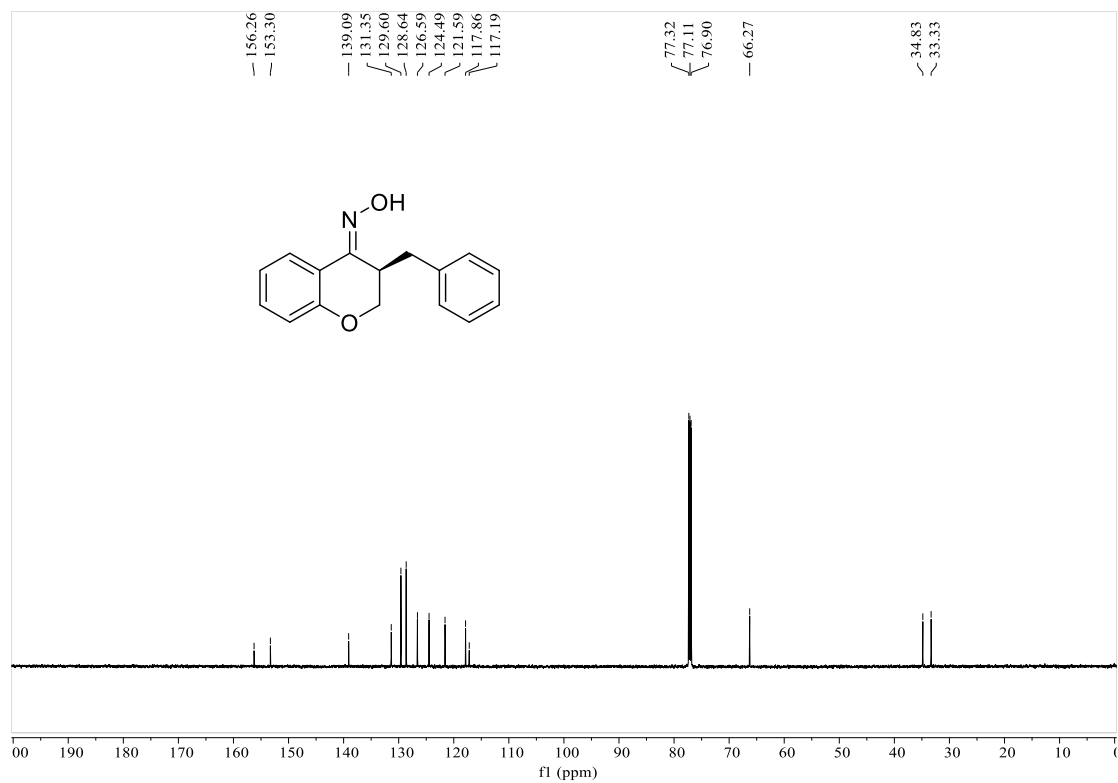

<sup>13</sup>C NMR (151 MHz, Chloroform-*d*)

Deuteration experiment (**2a-D**)

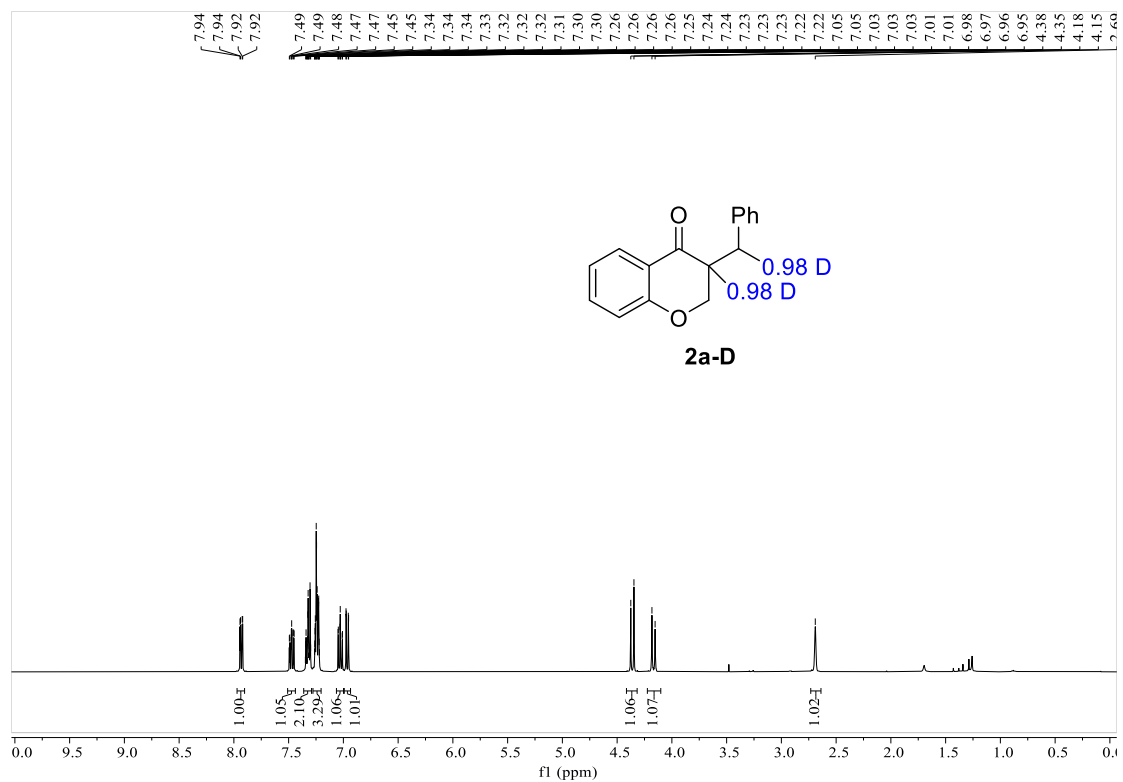

<sup>1</sup>H NMR (400 MHz, Chloroform-*d*)

(S)-3-Benzylchroman-4-one (2a)

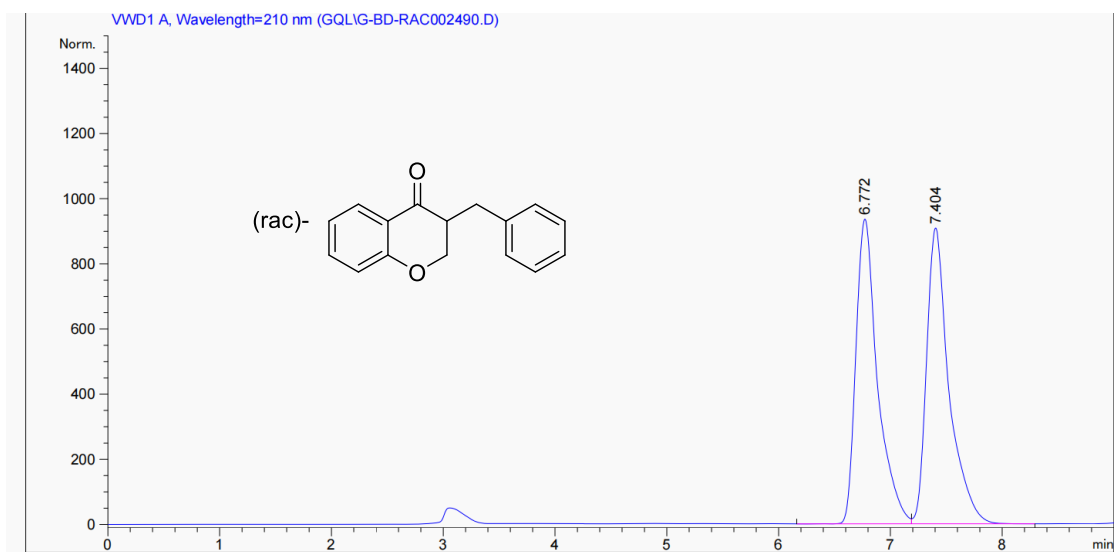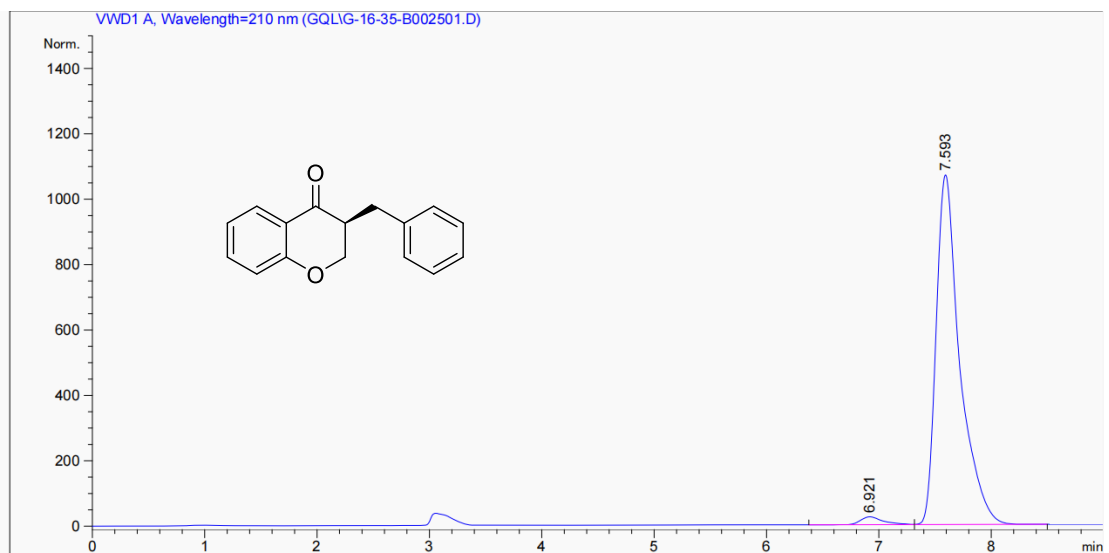

Signal 1: VWD1 A, Wavelength=210 nm

| Peak # | RetTime [min] | Type | Width [min] | Area [mAU*s] | Height [mAU] | Area %  |
|--------|---------------|------|-------------|--------------|--------------|---------|
| 1      | 6.921         | BV   | 0.2070      | 335.56378    | 24.16871     | 2.1052  |
| 2      | 7.593         | VB   | 0.2162      | 1.56044e4    | 1069.33105   | 97.8948 |

Totals : 1.59400e4 1093.49976

3-(3-Methylbenzyl)chroman-4-one (**2b**)

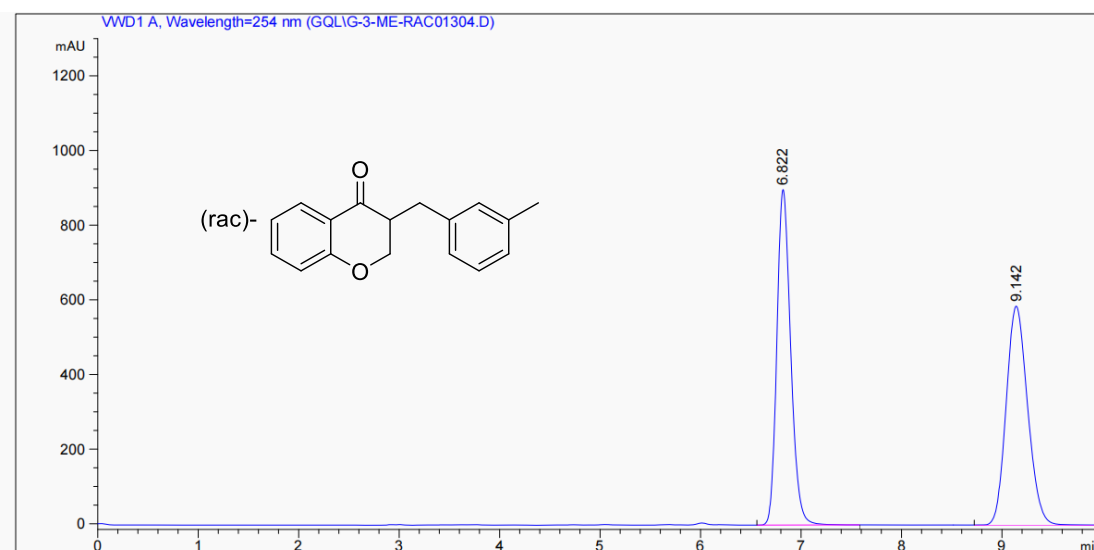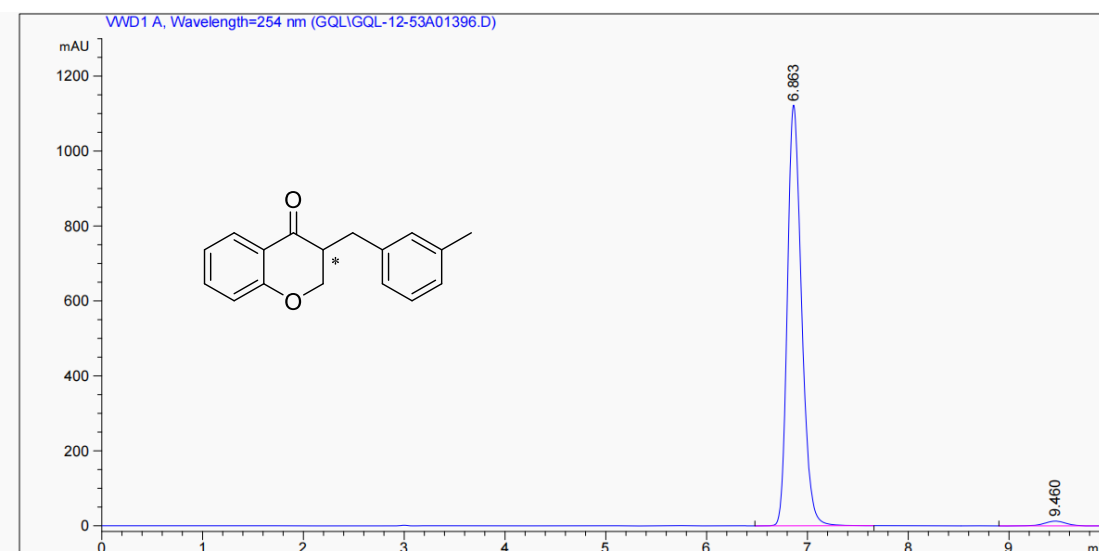

Signal 1: VWD1 A, Wavelength=254 nm

| Peak # | RetTime [min] | Type | Width [min] | Area [mAU*s] | Height [mAU] | Area %  |
|--------|---------------|------|-------------|--------------|--------------|---------|
| 1      | 6.863         | BB   | 0.1498      | 1.09555e4    | 1122.67407   | 98.3005 |
| 2      | 9.460         | BBA  | 0.2323      | 189.40291    | 12.67885     | 1.6995  |

Totals : 1.11449e4 1135.35292

3-(3-Methoxybenzyl)chroman-4-one (**2c**)

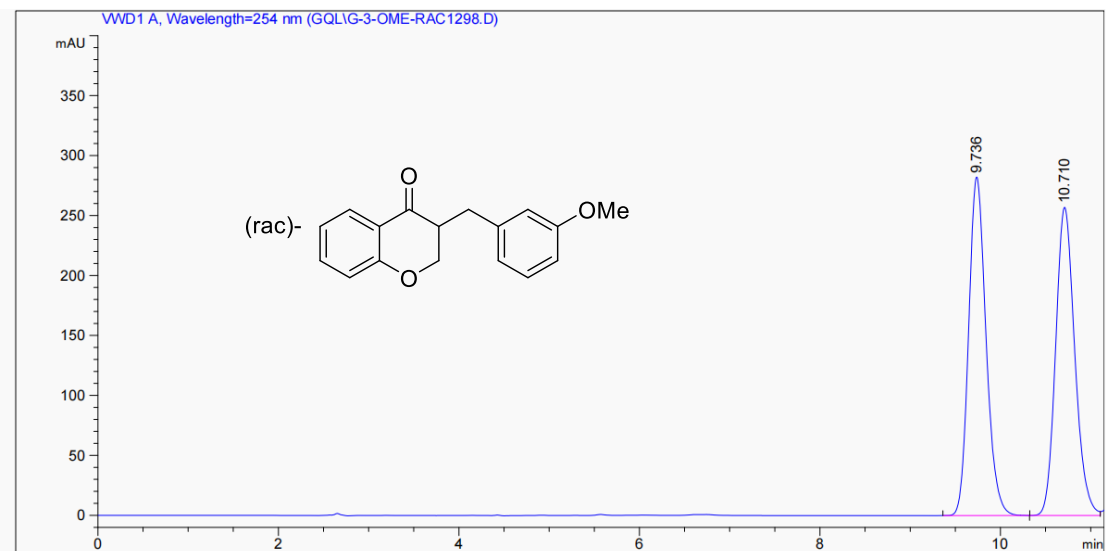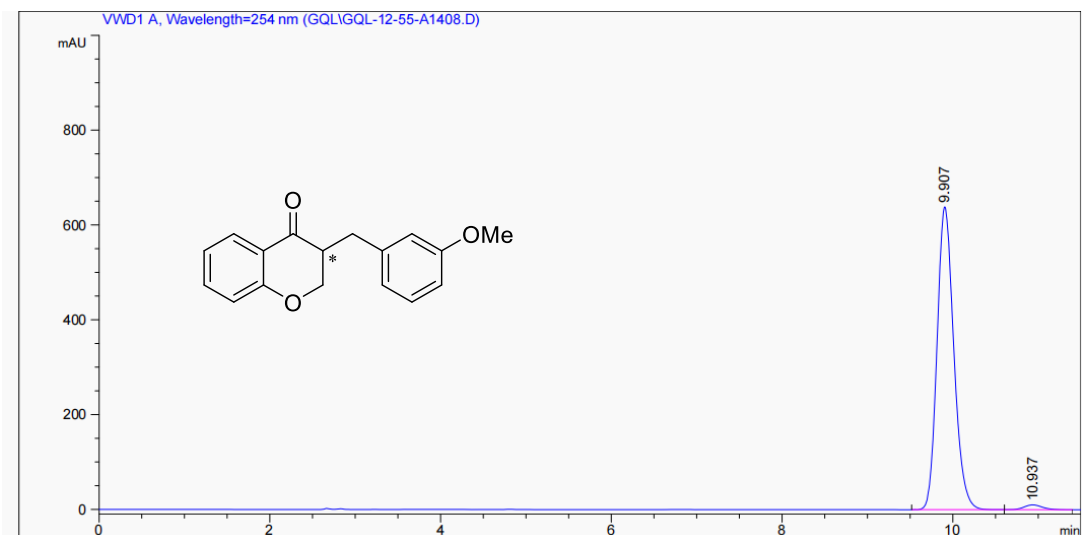

Signal 1: VWD1 A, Wavelength=254 nm

| Peak # | RetTime [min] | Type | Width [min] | Area [mAU*s] | Height [mAU] | Area %  |
|--------|---------------|------|-------------|--------------|--------------|---------|
| 1      | 9.907         | BB   | 0.2110      | 8706.12500   | 638.71991    | 98.2964 |
| 2      | 10.937        | BB   | 0.2287      | 150.88564    | 10.19224     | 1.7036  |

Totals : 8857.01064 648.91215

3-(3-Fluorobenzyl)chroman-4-one (**2d**)

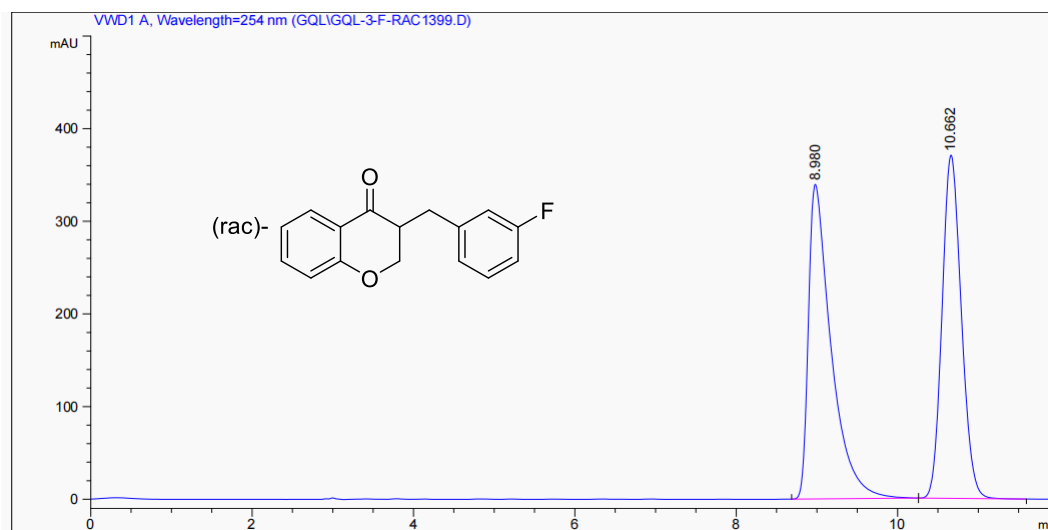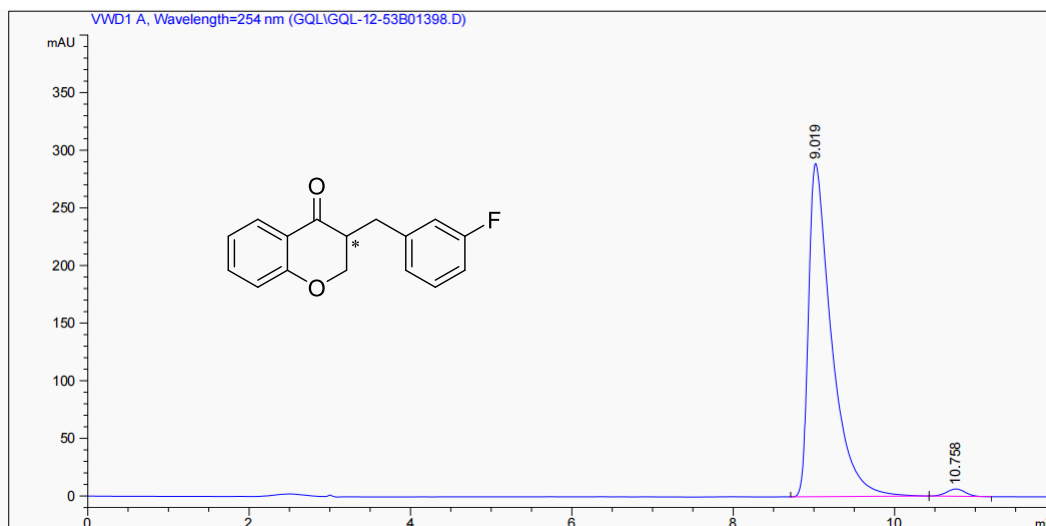

Signal 1: VWD1 A, Wavelength=254 nm

| Peak # | RetTime [min] | Type | Width [min] | Area [mAU*s] | Height [mAU] | Area %  |
|--------|---------------|------|-------------|--------------|--------------|---------|
| 1      | 9.019         | BB   | 0.2867      | 5692.09766   | 289.12540    | 98.2457 |
| 2      | 10.758        | BB   | 0.2505      | 101.63803    | 6.35916      | 1.7543  |

Totals : 5793.73569 295.48456



3-(4-Methylbenzyl)chroman-4-one (2e)

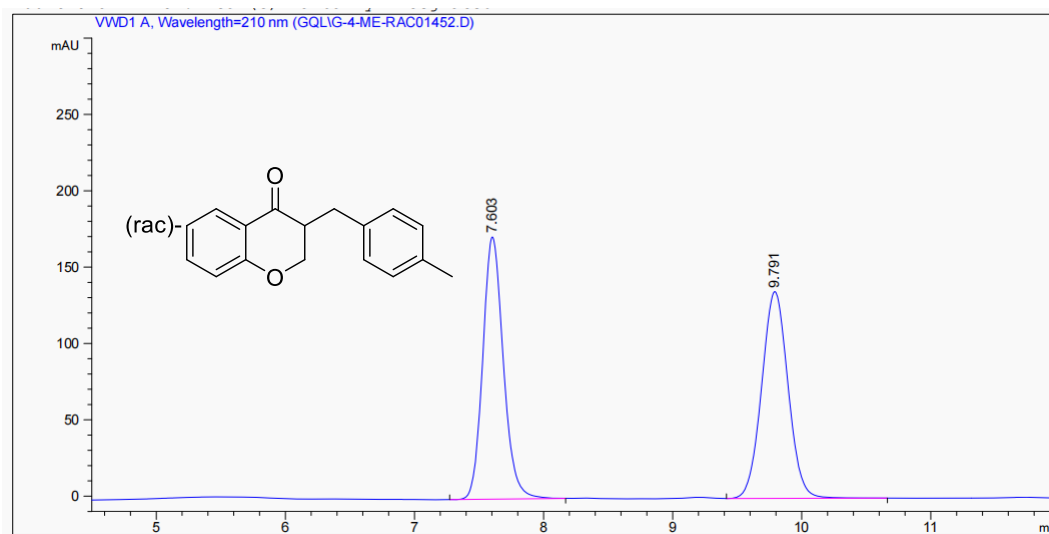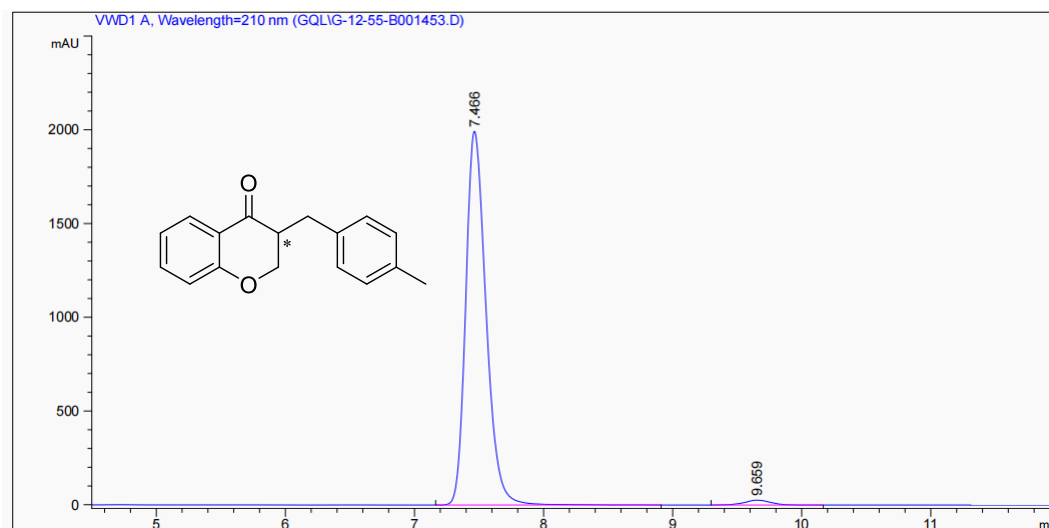

Signal 1: VWD1 A, Wavelength=210 nm

| Peak # | RetTime [min] | Type | Width [min] | Area [mAU*s] | Height [mAU] | Area %  |
|--------|---------------|------|-------------|--------------|--------------|---------|
| 1      | 7.466         | BB   | 0.1684      | 2.17704e4    | 1992.99316   | 98.3588 |
| 2      | 9.659         | BB   | 0.2179      | 363.25912    | 25.85127     | 1.6412  |

Totals : 2.21337e4 2018.84443



3-(4-Chlorobenzyl)chroman-4-one (2g)

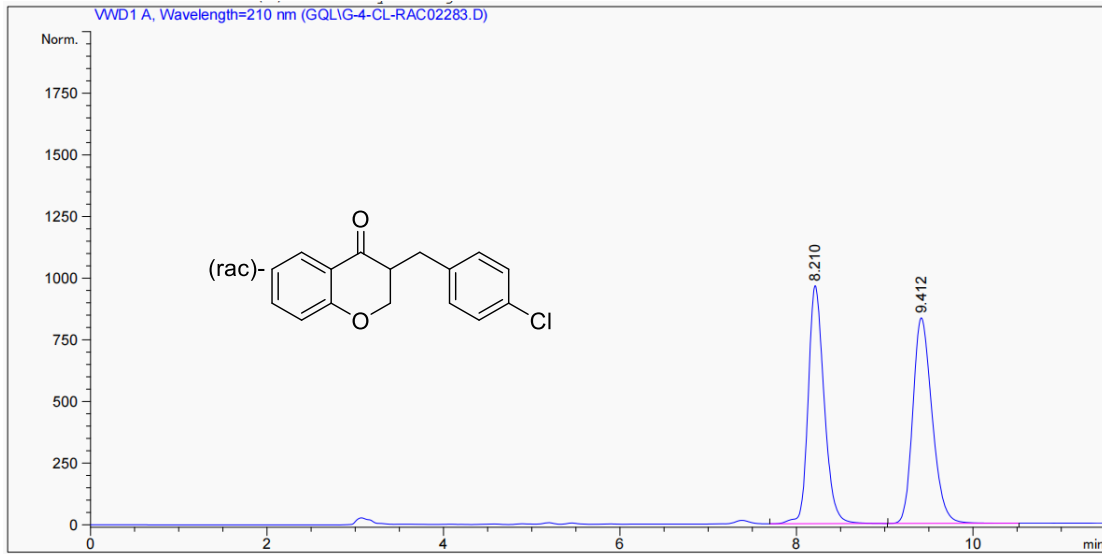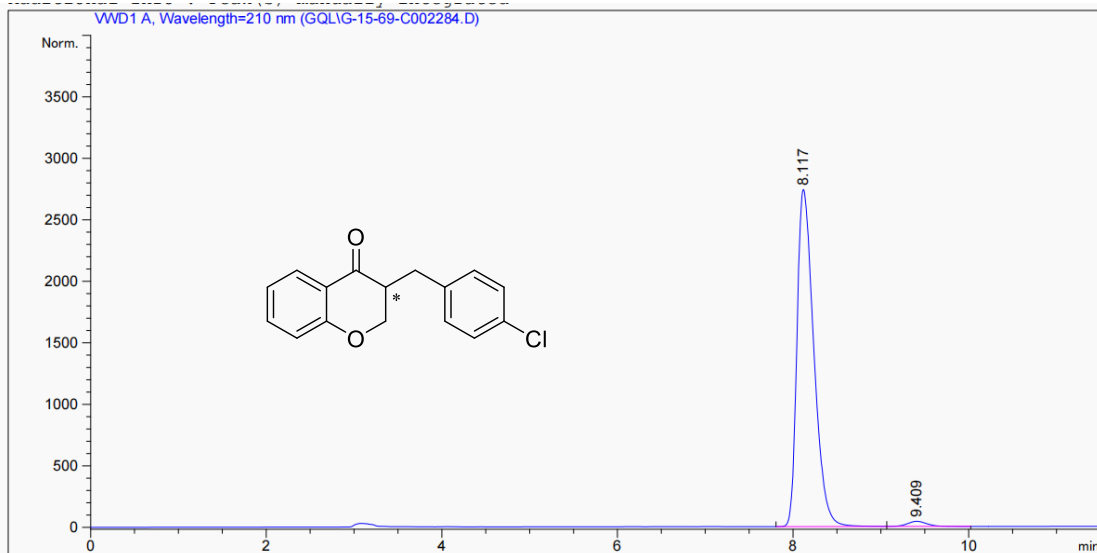

Signal 1: VWD1 A, Wavelength=210 nm

| Peak # | RetTime [min] | Type | Width [min] | Area [mAU*s] | Height [mAU] | Area %  |
|--------|---------------|------|-------------|--------------|--------------|---------|
| 1      | 8.117         | BV   | 0.2050      | 3.63914e4    | 2739.77051   | 98.2240 |
| 2      | 9.409         | VB   | 0.2395      | 657.97827    | 42.06408     | 1.7760  |

Totals : 3.70493e4 2781.83458

3-(2-Methylbenzyl)chroman-4-one (**2h**)

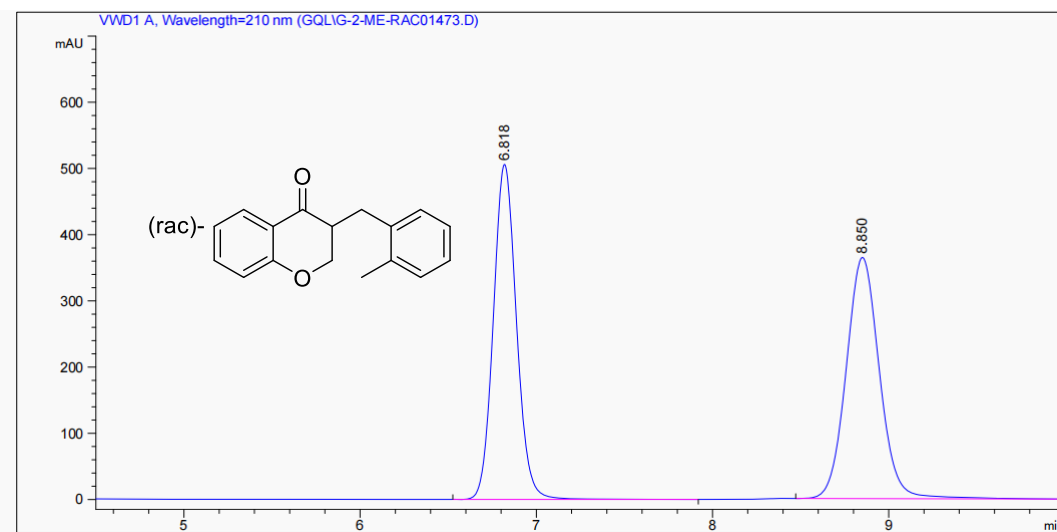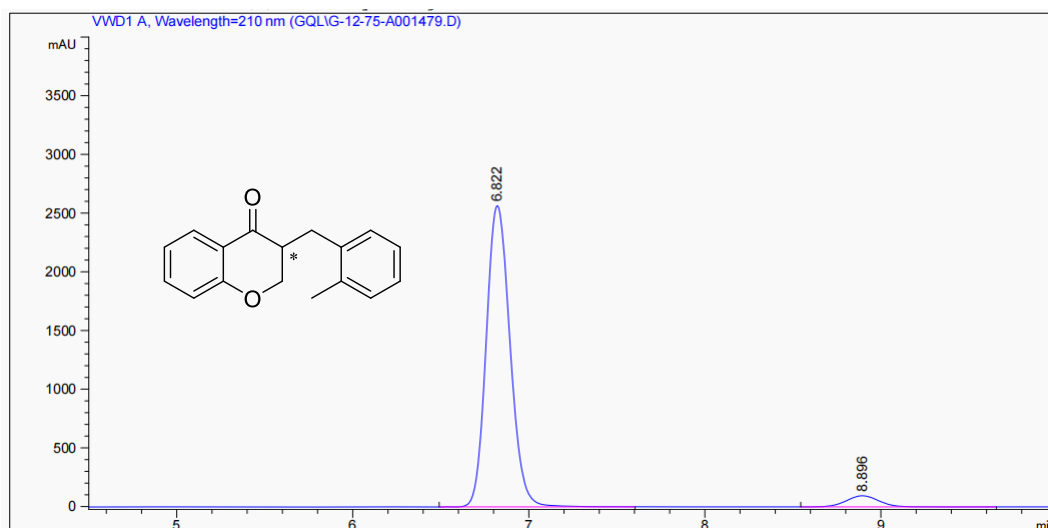

Signal 1: VWD1 A, Wavelength=210 nm

| Peak # | RetTime [min] | Type | Width [min] | Area [mAU*s] | Height [mAU] | Area %  |
|--------|---------------|------|-------------|--------------|--------------|---------|
| 1      | 6.822         | BV   | 0.1467      | 2.41312e4    | 2565.40796   | 95.1457 |
| 2      | 8.896         | VB   | 0.2009      | 1231.17529   | 95.20234     | 4.8543  |

Totals : 2.53624e4 2660.61030

3-(2-Methoxybenzyl)chroman-4-one (**2i**)

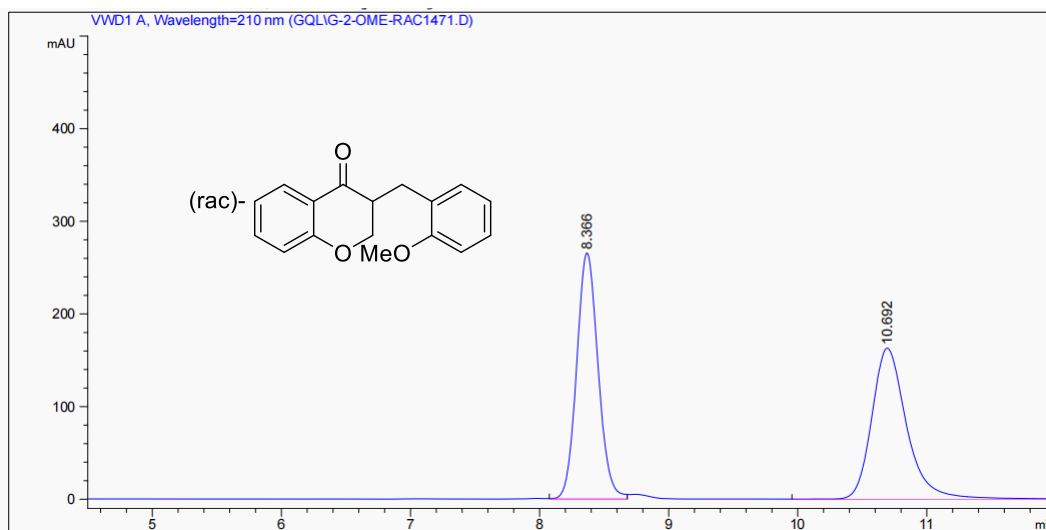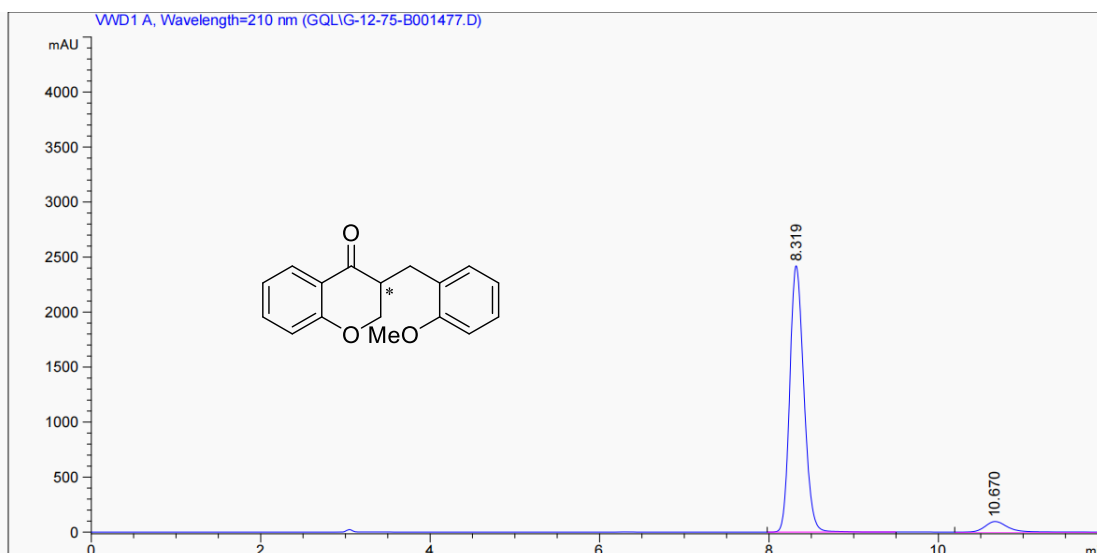

Signal 1: VWD1 A, Wavelength=210 nm

| Peak # | RetTime [min] | Type | Width [min] | Area [mAU*s] | Height [mAU] | Area %  |
|--------|---------------|------|-------------|--------------|--------------|---------|
| 1      | 8.319         | BB   | 0.1797      | 2.79509e4    | 2420.52344   | 94.0106 |
| 2      | 10.670        | BB   | 0.2808      | 1780.75342   | 96.27020     | 5.9894  |

Totals : 2.97317e4 2516.79363

3-(2-Bromobenzyl)chroman-4-one (2j)

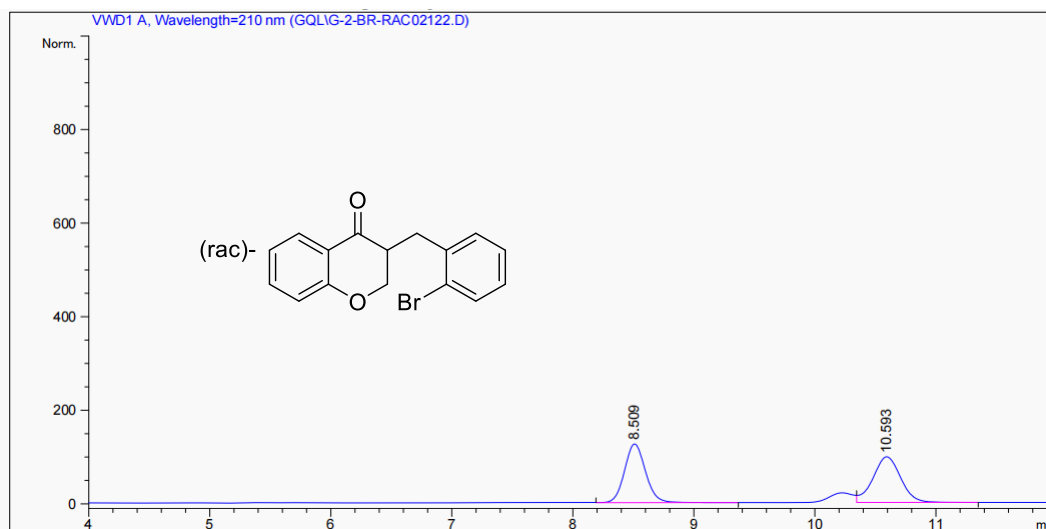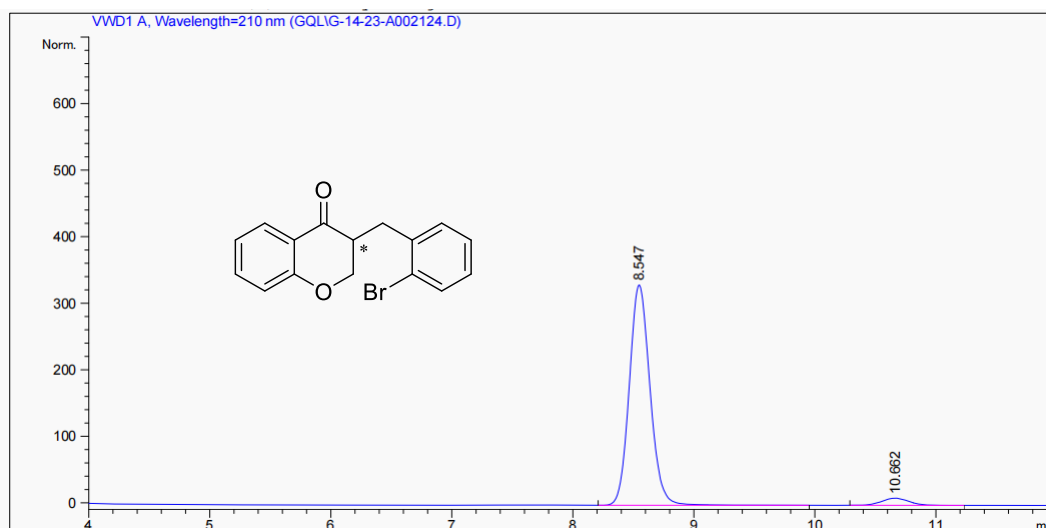

Signal 1: VWD1 A, Wavelength=210 nm

| Peak # | RetTime [min] | Type | Width [min] | Area [mAU*s] | Height [mAU] | Area %  |
|--------|---------------|------|-------------|--------------|--------------|---------|
| 1      | 8.547         | BB   | 0.1839      | 3940.78125   | 331.03705    | 95.8732 |
| 2      | 10.662        | BB   | 0.2439      | 169.62752    | 10.81828     | 4.1268  |

Totals : 4110.40877 341.85533

3-(2-Fluorobenzyl)chroman-4-one (**2k**)

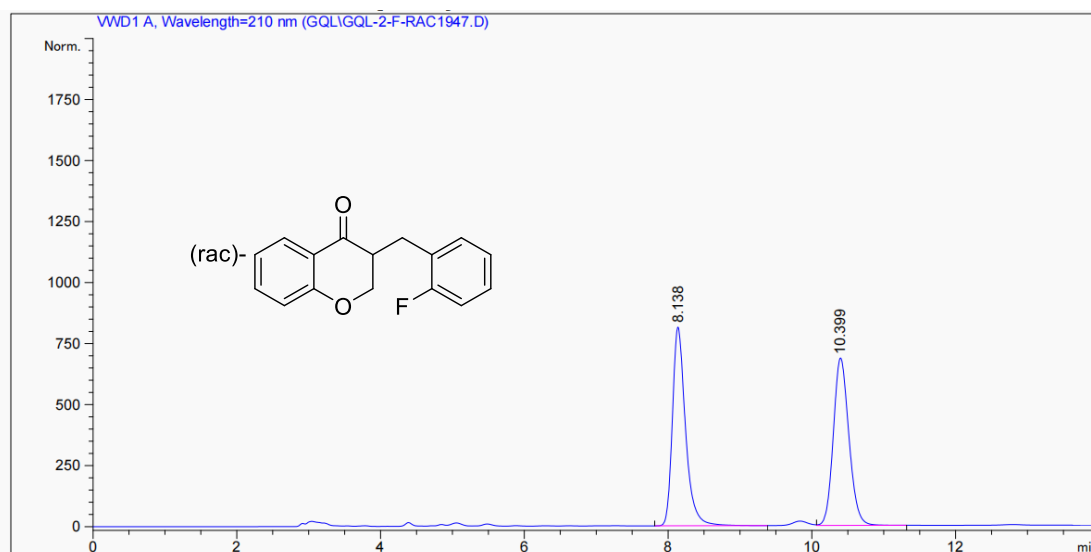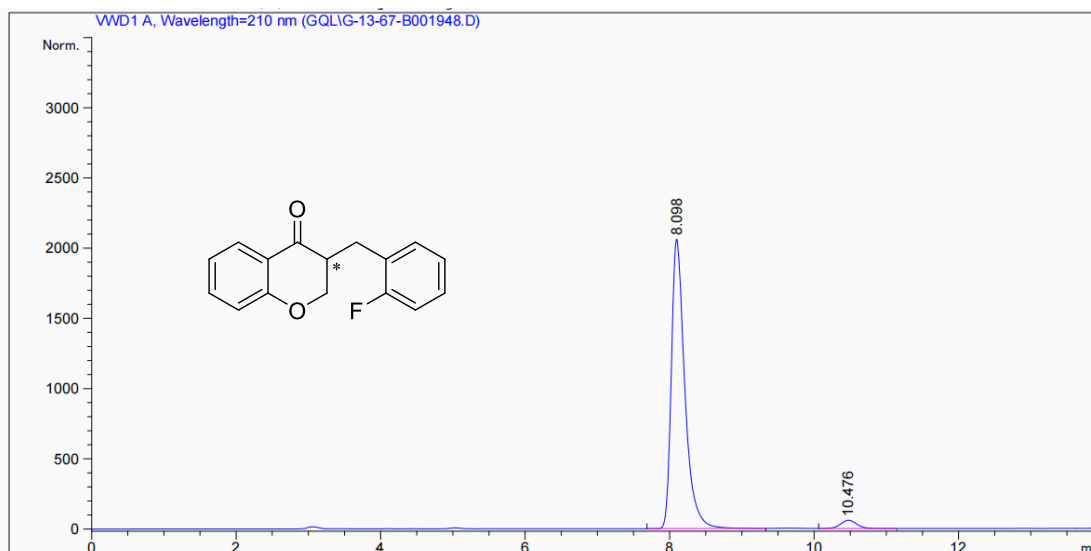

Signal 1: VWD1 A, Wavelength=210 nm

| Peak # | RetTime [min] | Type | Width [min] | Area [mAU*s] | Height [mAU] | Area %  |
|--------|---------------|------|-------------|--------------|--------------|---------|
| 1      | 8.098         | BB   | 0.1960      | 2.66591e4    | 2059.64771   | 96.6929 |
| 2      | 10.476        | BB   | 0.2401      | 911.80908    | 58.40668     | 3.3071  |

Totals : 2.75709e4 2118.05439

3-(Furan-2-ylmethyl)chroman-4-one (**21**)

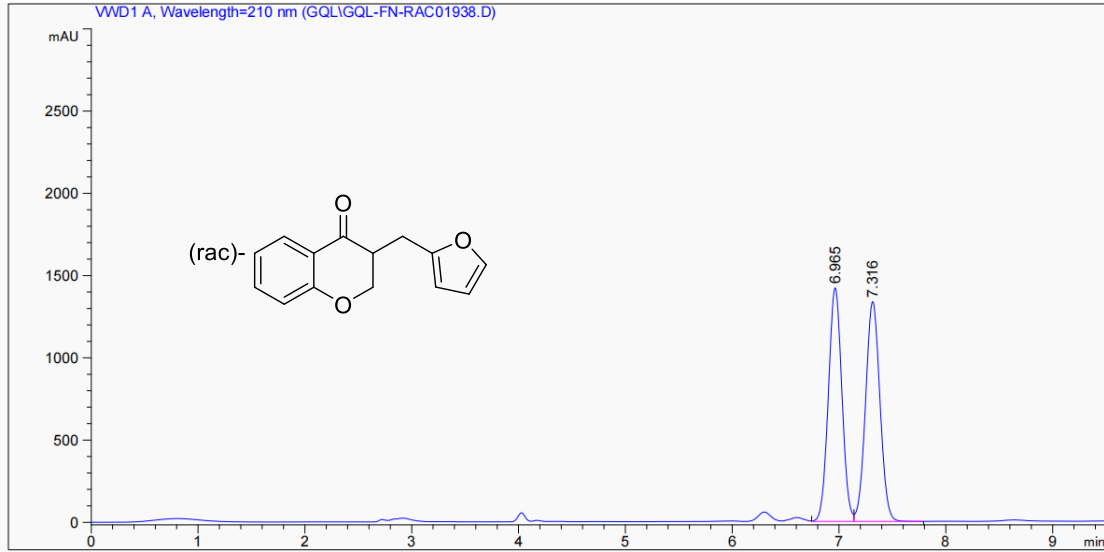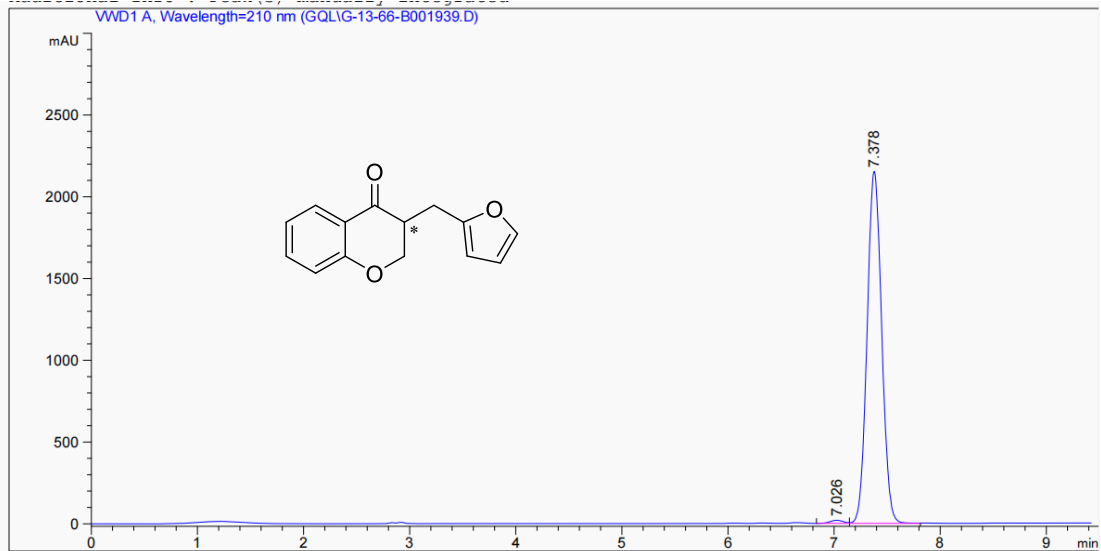

Signal 1: VWD1 A, Wavelength=210 nm

| Peak # | RetTime [min] | Type | Width [min] | Area [mAU*s] | Height [mAU] | Area %  |
|--------|---------------|------|-------------|--------------|--------------|---------|
| 1      | 7.026         | BV   | 0.1336      | 164.18068    | 19.23017     | 0.7939  |
| 2      | 7.378         | VV   | 0.1492      | 2.05162e4    | 2153.14746   | 99.2061 |

Totals : 2.06804e4 2172.37763



3-(Naphthalen-2-ylmethyl)chroman-4-one (**2m**)

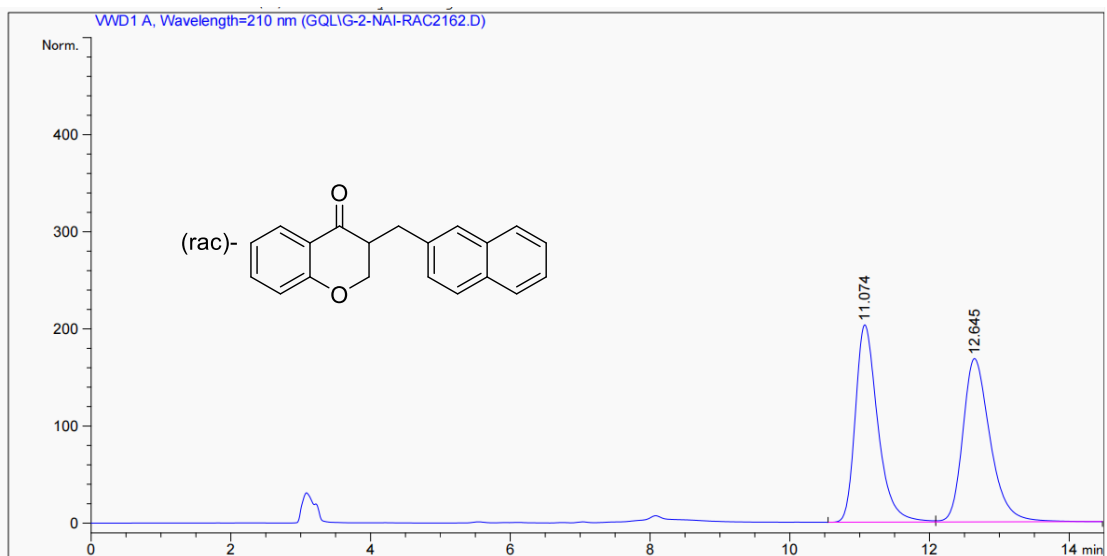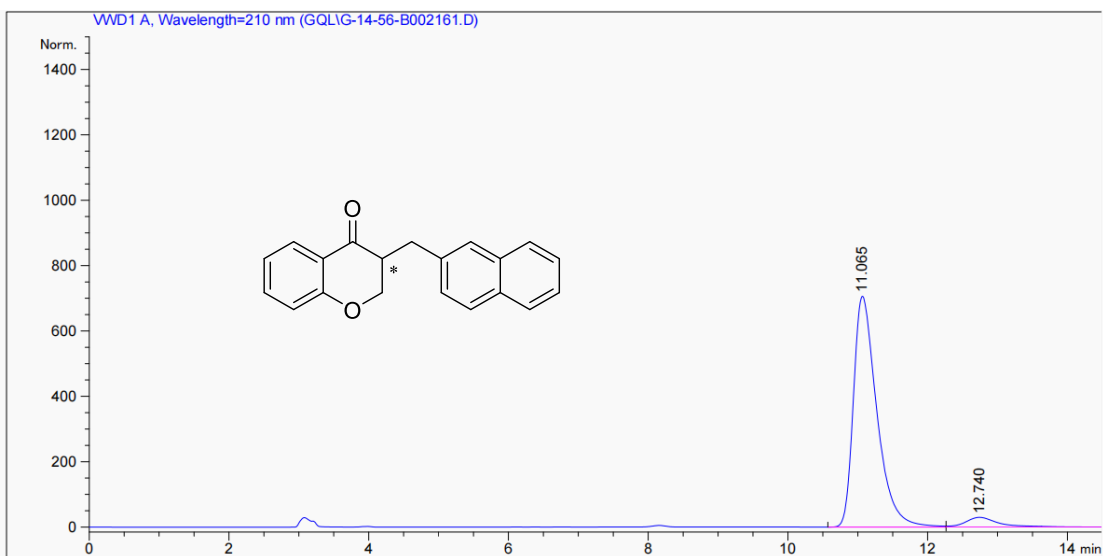

Signal 1: VWD1 A, Wavelength=210 nm

| Peak #   | RetTime [min] | Type | Width [min] | Area [mAU*s] | Height [mAU] | Area %  |
|----------|---------------|------|-------------|--------------|--------------|---------|
| 1        | 11.065        | BV   | 0.3525      | 1.64334e4    | 706.07458    | 94.2730 |
| 2        | 12.740        | VB   | 0.4924      | 998.31915    | 29.68058     | 5.7270  |
| Totals : |               |      |             | 1.74318e4    | 735.75517    |         |

3-(Naphthalen-1-ylmethyl)chroman-4-one (**2n**)

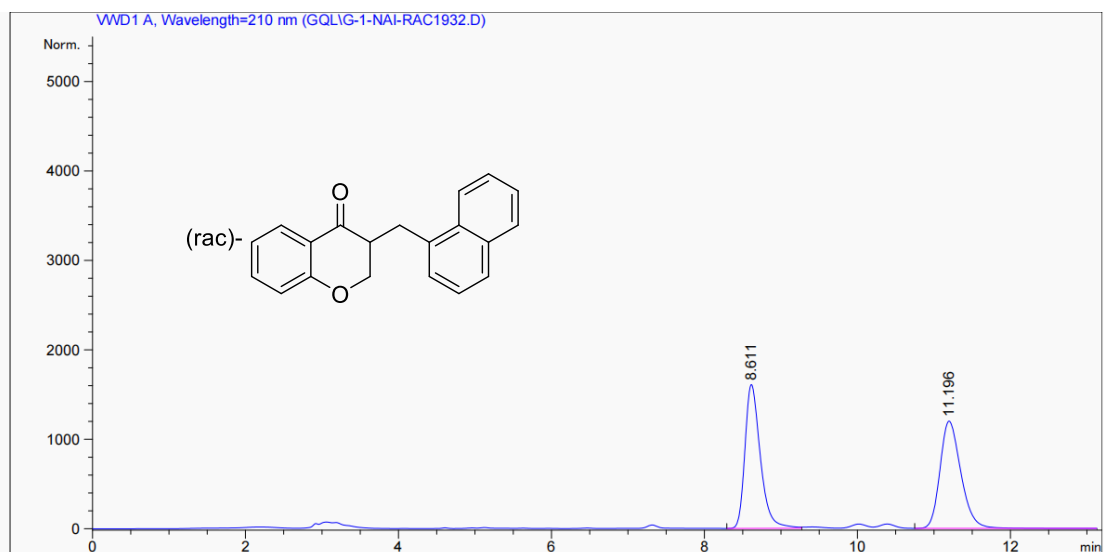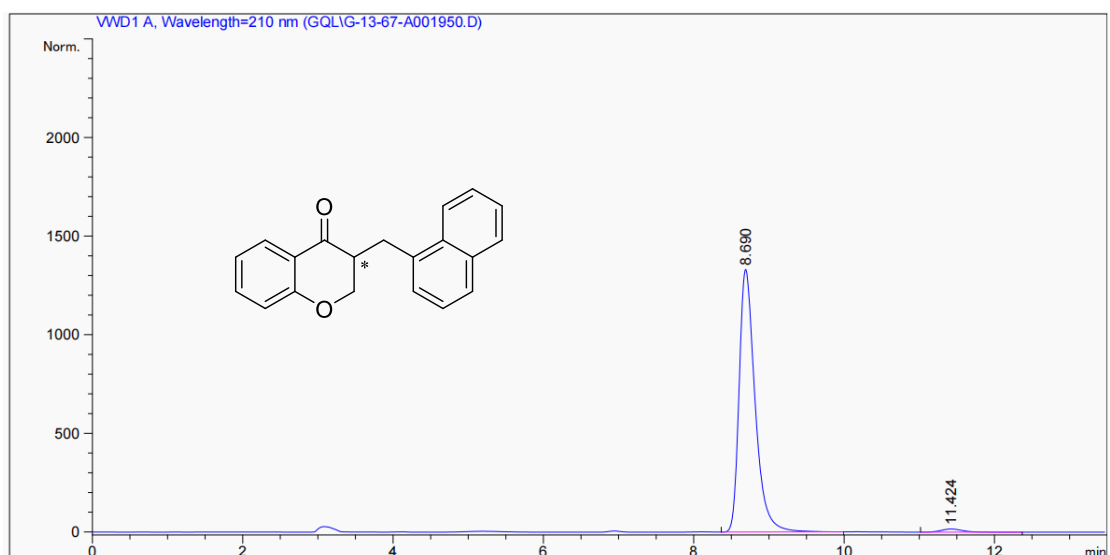

Signal 1: VWD1 A, Wavelength=210 nm

| Peak # | RetTime [min] | Type | Width [min] | Area [mAU*s] | Height [mAU] | Area %  |
|--------|---------------|------|-------------|--------------|--------------|---------|
| 1      | 8.690         | BB   | 0.2238      | 1.96081e4    | 1331.23035   | 98.4233 |
| 2      | 11.424        | BB   | 0.3050      | 314.11801    | 15.93201     | 1.5767  |

Totals : 1.99222e4 1347.16235

3-isobutylchroman-4-one (**2o**)

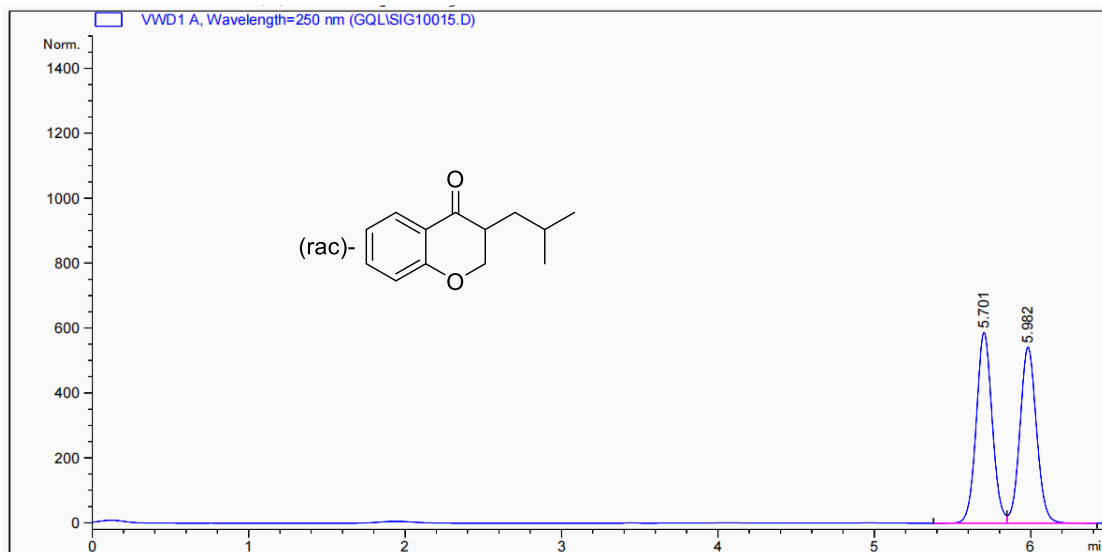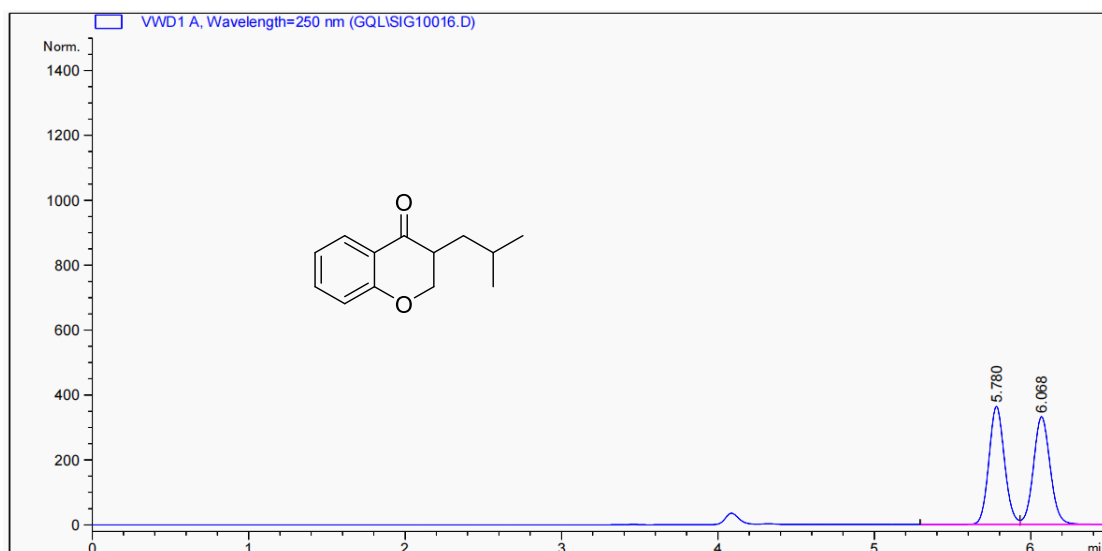

| Peak #   | RetTime [min] | Type | Width [min] | Area [mAU*s] | Height [mAU] | Area %  |
|----------|---------------|------|-------------|--------------|--------------|---------|
| 1        | 5.780         | BV   | 0.1079      | 2523.54199   | 363.77313    | 50.5865 |
| 2        | 6.068         | VB   | 0.1147      | 2465.02344   | 331.88086    | 49.4135 |
| Totals : |               |      |             | 4988.56543   | 695.65399    |         |

### 3-Benzyl-6-methylchroman-4-one (2p)

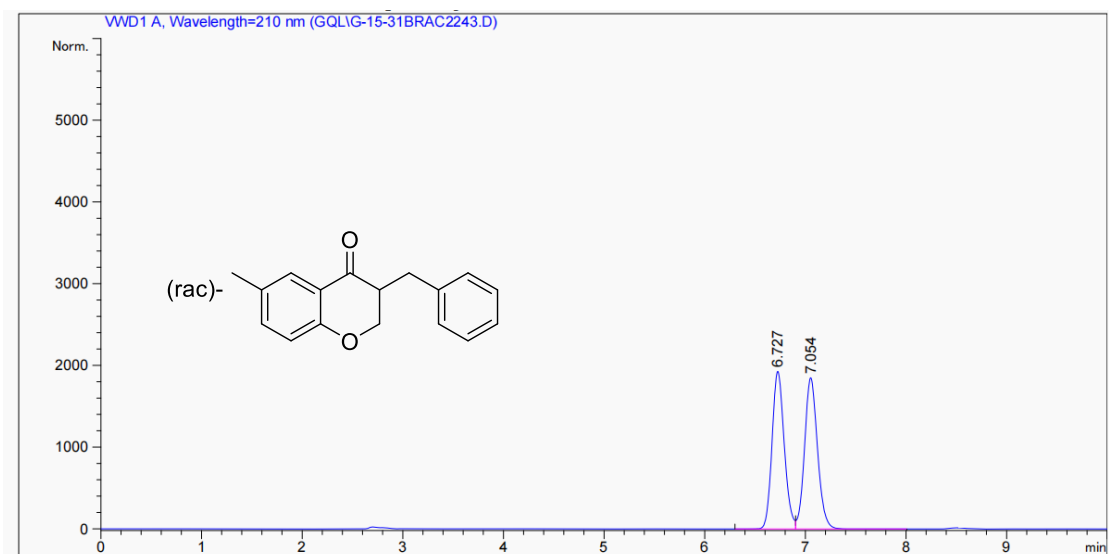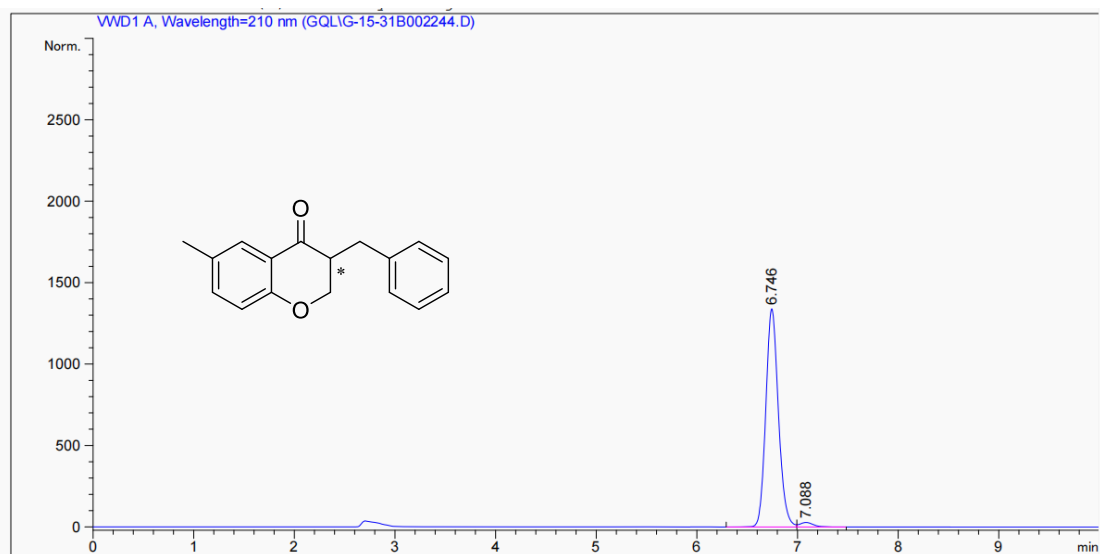

Signal 1: VWD1 A, Wavelength=210 nm

| Peak # | RetTime [min] | Type | Width [min] | Area [mAU*s] | Height [mAU] | Area %  |
|--------|---------------|------|-------------|--------------|--------------|---------|
| 1      | 6.746         | BV   | 0.1347      | 1.16765e4    | 1339.11902   | 97.8558 |
| 2      | 7.088         | VB   | 0.1378      | 255.85263    | 27.93857     | 2.1442  |

Totals : 1.19323e4 1367.05759

(R)-2-Benzyl-3,4-dihydronaphthalen-1(2H)-one (2q)

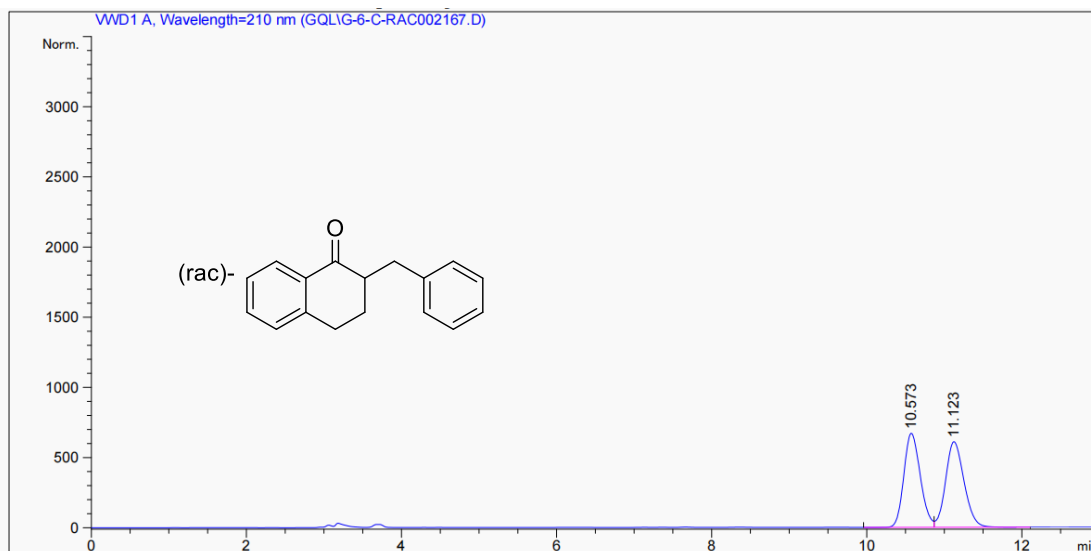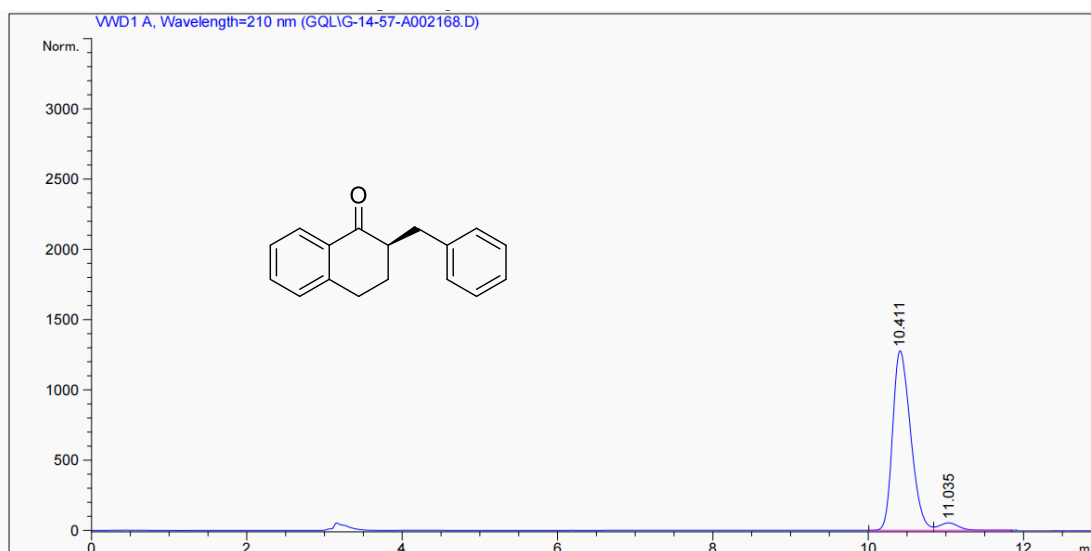

Signal 1: VWD1 A, Wavelength=210 nm

| Peak # | RetTime [min] | Type | Width [min] | Area [mAU*s] | Height [mAU] | Area %  |
|--------|---------------|------|-------------|--------------|--------------|---------|
| 1      | 10.411        | BV   | 0.2502      | 2.05015e4    | 1277.49866   | 95.7771 |
| 2      | 11.035        | VB   | 0.2616      | 903.92493    | 52.57127     | 4.2229  |

Totals : 2.14054e4 1330.06992

(R)-2-Benzylcyclohexan-1-one (**2r**)

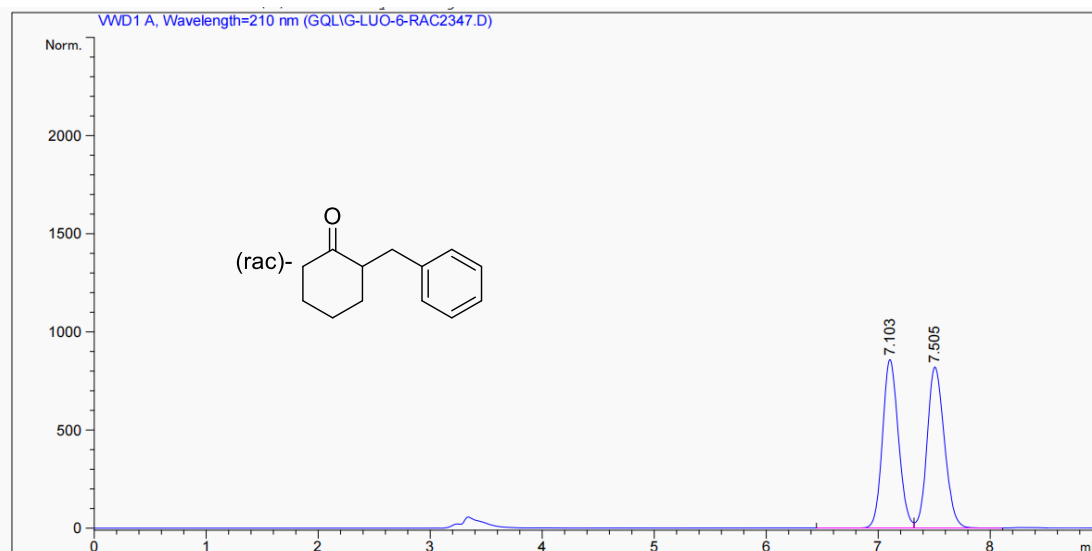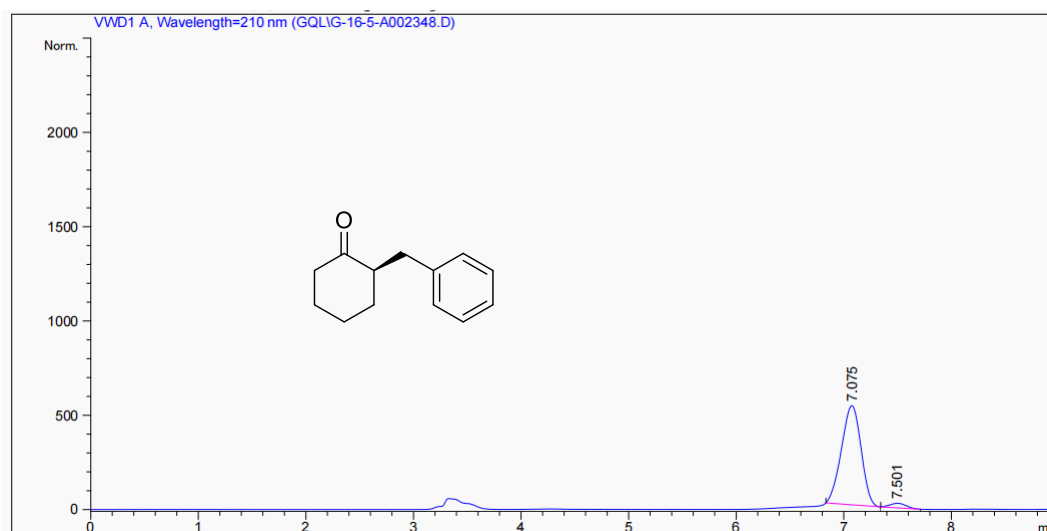

Signal 1: VWD1 A, Wavelength=210 nm

| Peak # | RetTime [min] | Type | Width [min] | Area [mAU*s] | Height [mAU] | Area %  |
|--------|---------------|------|-------------|--------------|--------------|---------|
| 1      | 7.075         | BB   | 0.1874      | 6645.47266   | 525.92828    | 96.3688 |
| 2      | 7.501         | BB   | 0.1678      | 250.40022    | 24.19187     | 3.6312  |

Totals : 6895.87288 550.12015

2-Benzyl-2,3-dihydro-1H-inden-1-one (2s)

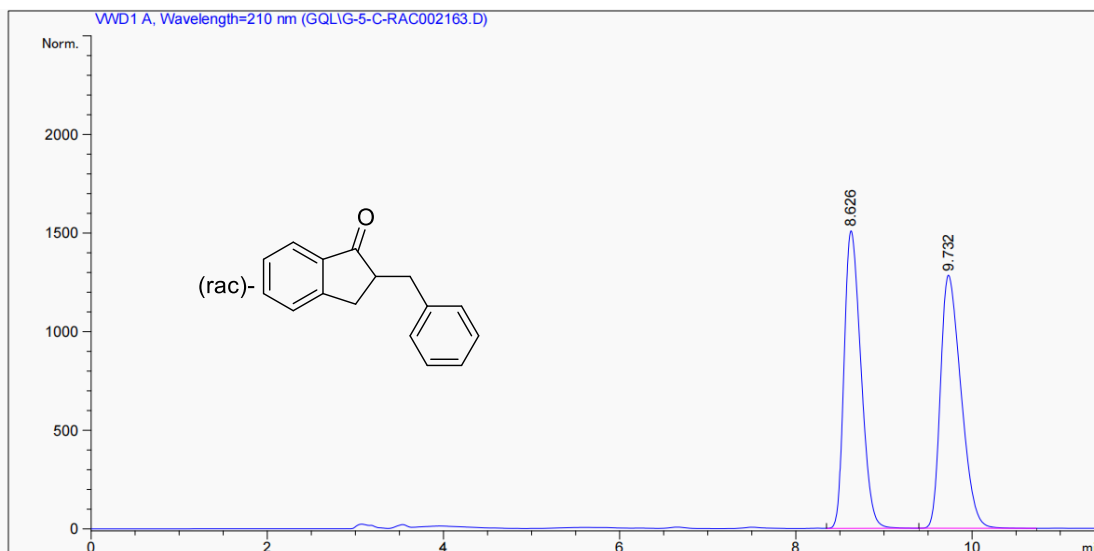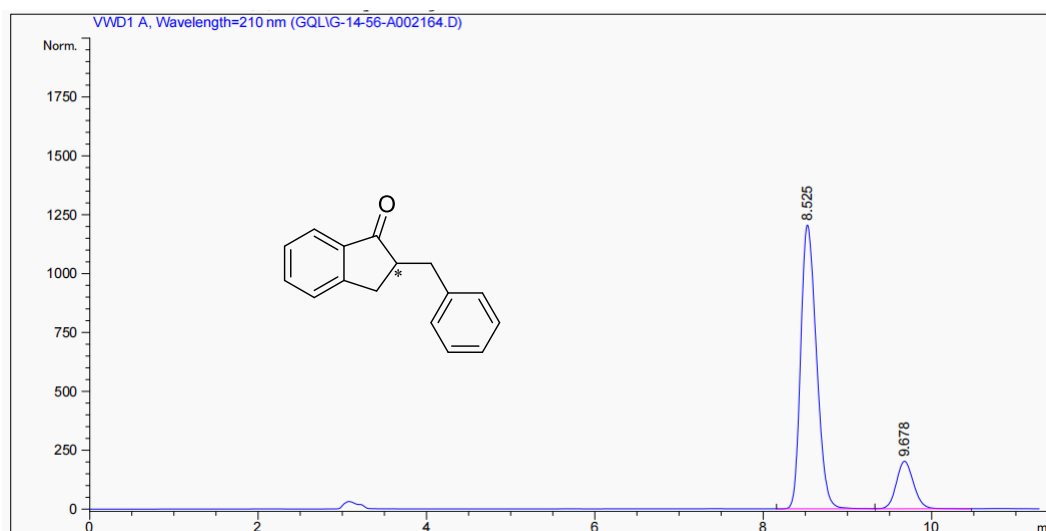

Signal 1: VWD1 A, Wavelength=210 nm

| Peak # | RetTime [min] | Type | Width [min] | Area [mAU*s] | Height [mAU] | Area %  |
|--------|---------------|------|-------------|--------------|--------------|---------|
| 1      | 8.525         | BV   | 0.2032      | 1.56166e4    | 1204.97974   | 84.5529 |
| 2      | 9.678         | VB   | 0.2188      | 2853.02466   | 201.99254    | 15.4471 |

Totals : 1.84697e4 1406.97227

(S)-2-Benzylcyclopentan-1-one (**2t**)

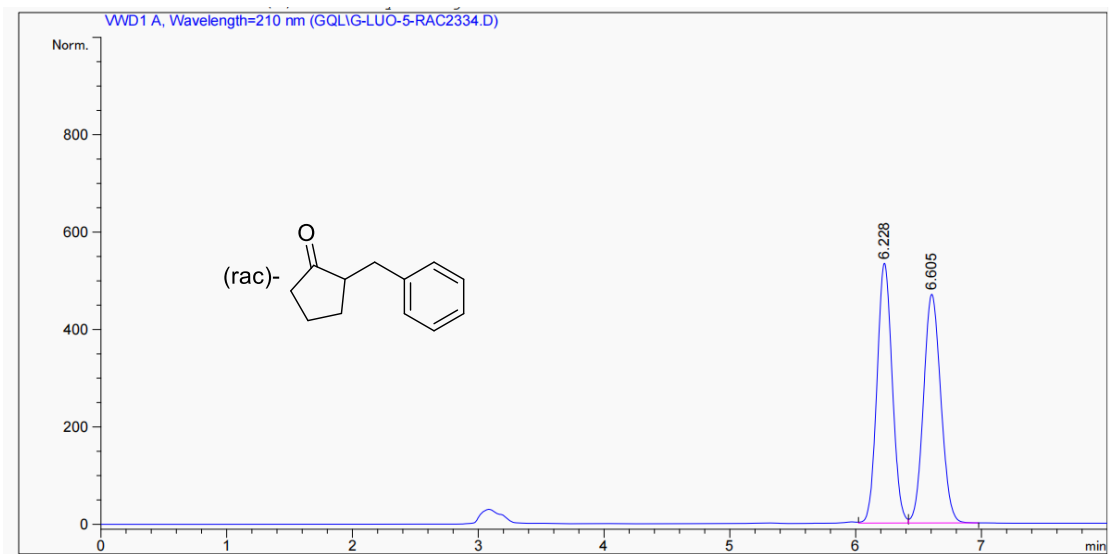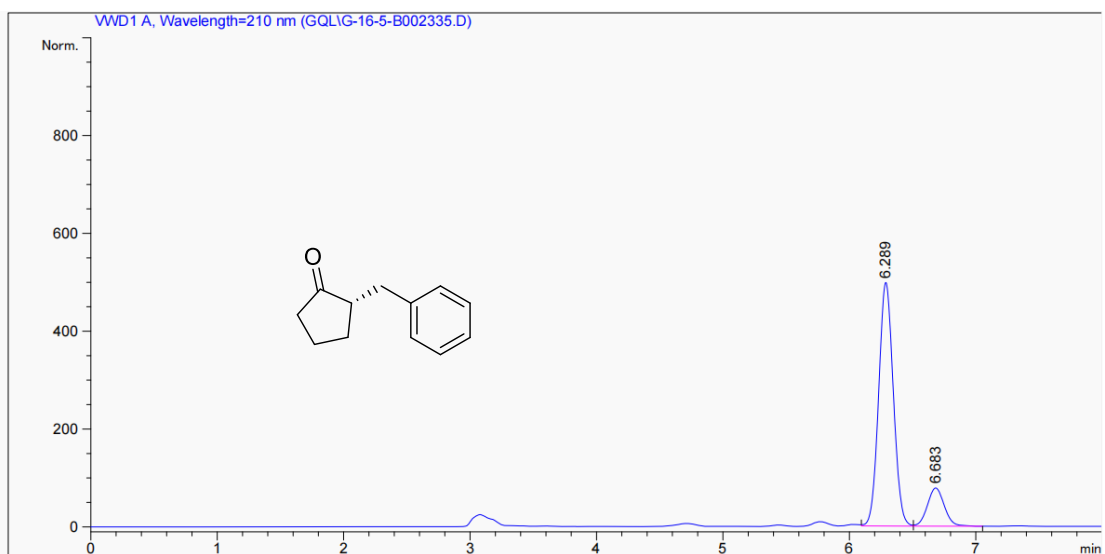

Signal 1: VWD1 A, Wavelength=210 nm

| Peak # | RetTime [min] | Type | Width [min] | Area [mAU*s] | Height [mAU] | Area %  |
|--------|---------------|------|-------------|--------------|--------------|---------|
| 1      | 6.289         | VV   | 0.1259      | 4007.26855   | 497.99661    | 84.6791 |
| 2      | 6.683         | VB   | 0.1444      | 725.03284    | 78.00783     | 15.3209 |

Totals : 4732.30139 576.00444



(R)-2-Methyl-1,3-diphenylpropan-1-one (**2u**)

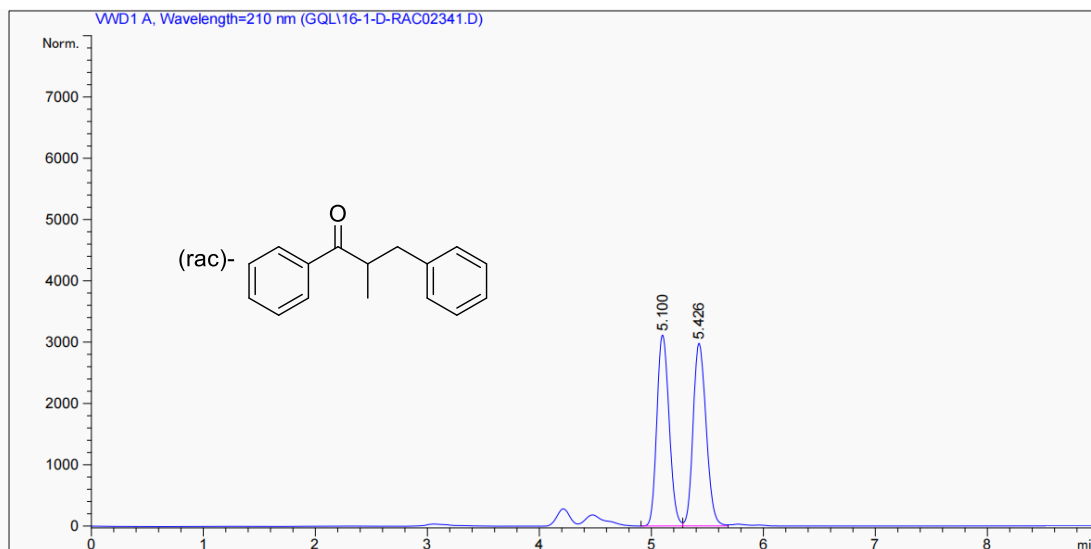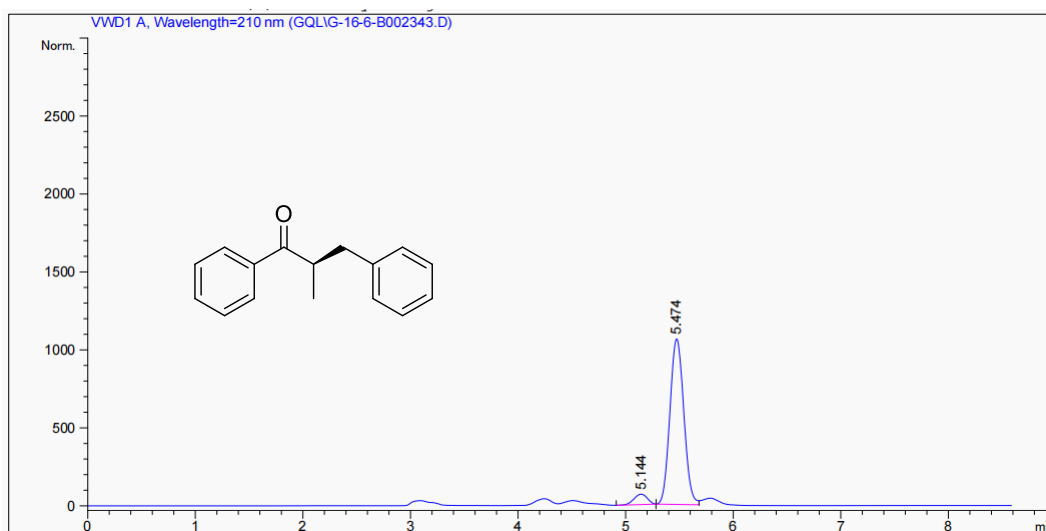

Signal 1: VWD1 A, Wavelength=210 nm

| Peak # | RetTime [min] | Type | Width [min] | Area [mAU*s] | Height [mAU] | Area %  |
|--------|---------------|------|-------------|--------------|--------------|---------|
| 1      | 5.144         | BB   | 0.1383      | 575.14771    | 66.89952     | 5.6778  |
| 2      | 5.474         | BV   | 0.1430      | 9554.57520   | 1061.21436   | 94.3222 |

Totals : 1.01297e4 1128.11388

3,5-dibenzyltetrahydro-4H-pyran-4-one (**4a**)

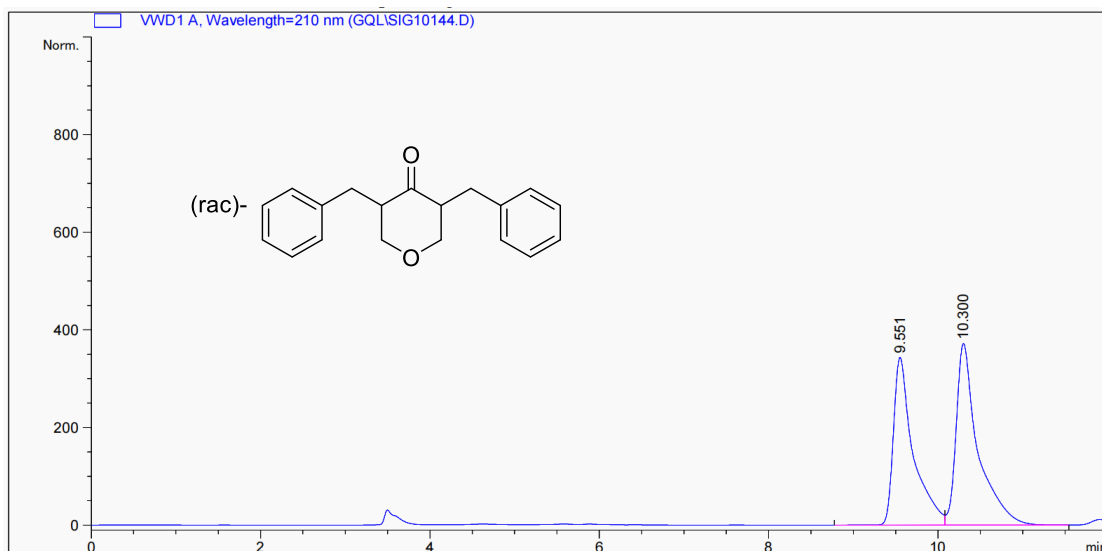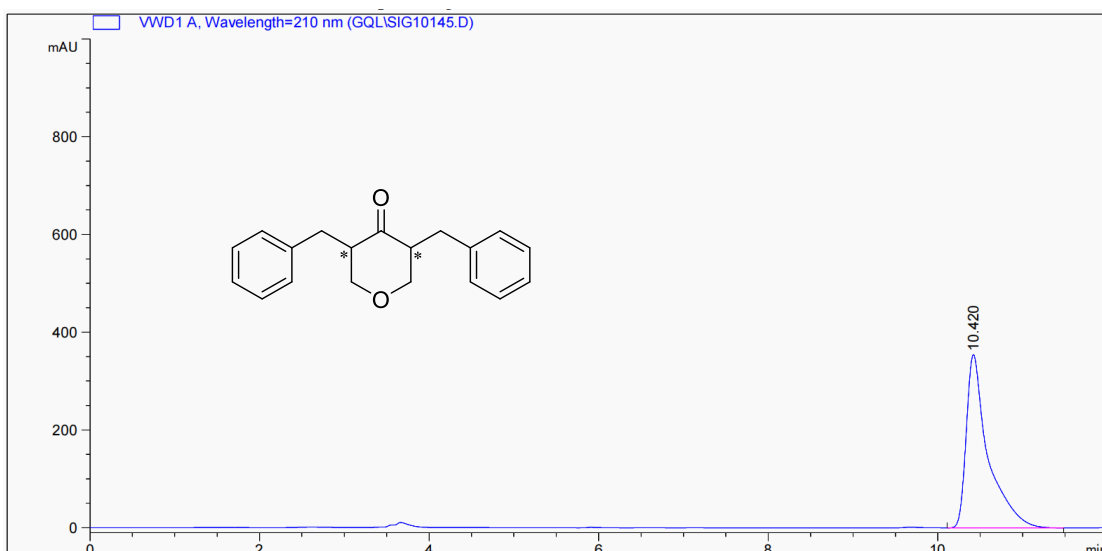

| Peak #   | RetTime [min] | Type | Width [min] | Area [mAU*s] | Height [mAU] | Area %   |
|----------|---------------|------|-------------|--------------|--------------|----------|
| 1        | 10.420        | VB   | 0.2526      | 6309.24121   | 354.61420    | 100.0000 |
| Totals : |               |      |             | 6309.24121   | 354.61420    |          |

3,5-bis(4-methylbenzyl)tetrahydro-4H-pyran-4-one (**4b**)

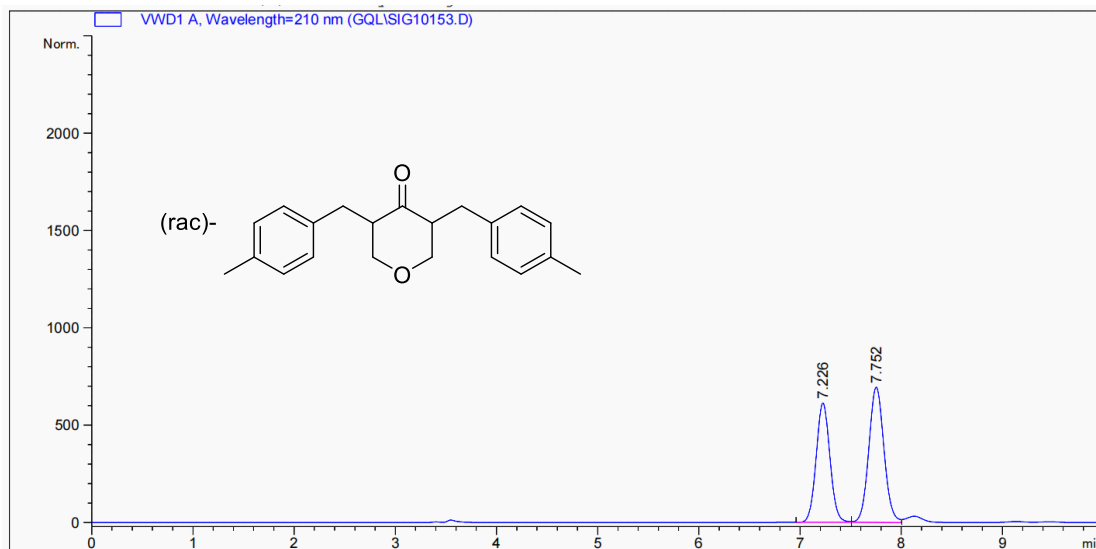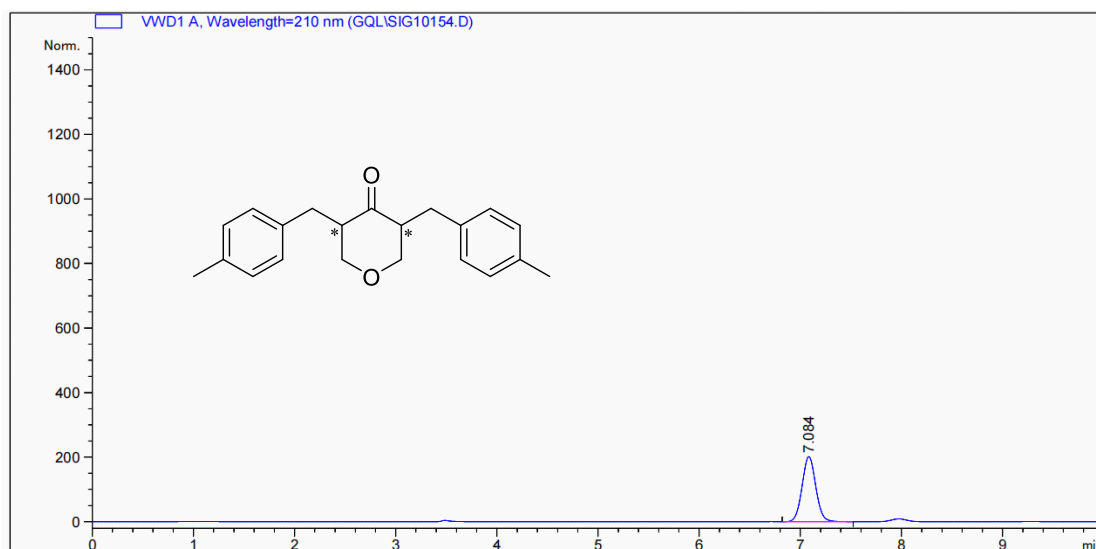

| Peak # | RetTime [min] | Type | Width [min] | Area [mAU*s] | Height [mAU] | Area %   |
|--------|---------------|------|-------------|--------------|--------------|----------|
| 1      | 7.084         | VB   | 0.1456      | 1895.08313   | 201.64590    | 100.0000 |

Totals : 1895.08313 201.64590

(+)-(2*R*,6*R*)-2,6-Dibenzylcyclohexan-1-one (**4c**)

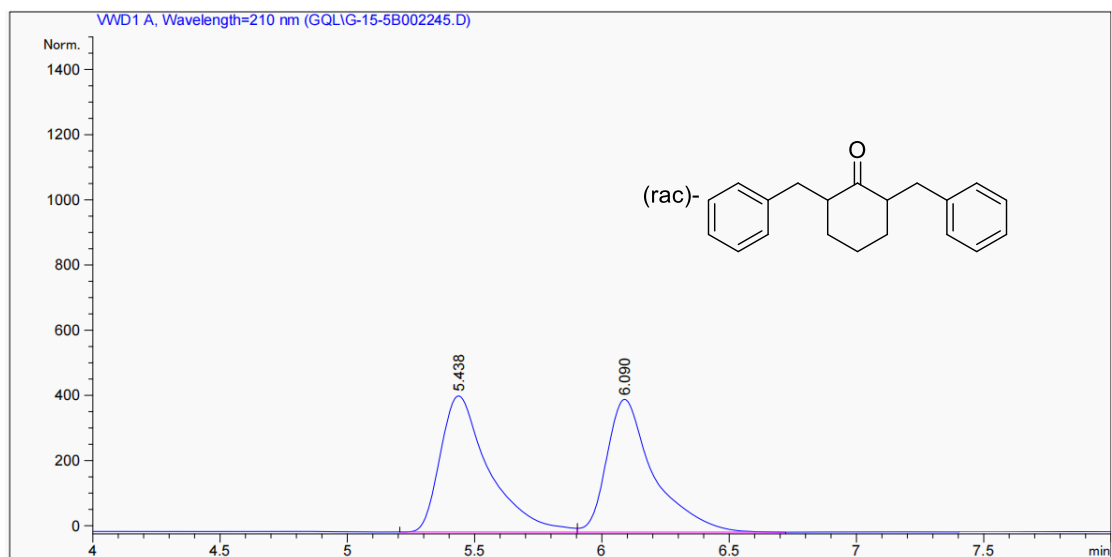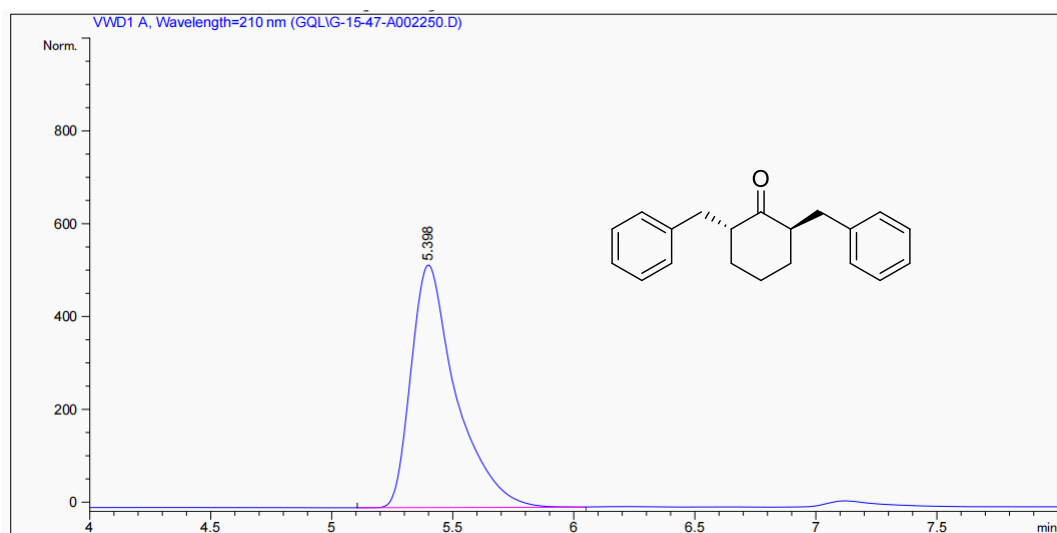

Signal 1: VWD1 A, Wavelength=210 nm

| Peak # | RetTime [min] | Type | Width [min] | Area [mAU*s] | Height [mAU] | Area %   |
|--------|---------------|------|-------------|--------------|--------------|----------|
| 1      | 5.398         | BV   | 0.1894      | 6735.31982   | 522.56036    | 100.0000 |

Totals : 6735.31982 522.56036

(+)-(2*R*,6*R*)-2,6-Bis(3-methylbenzyl)cyclohexan-1-one (**4d**)

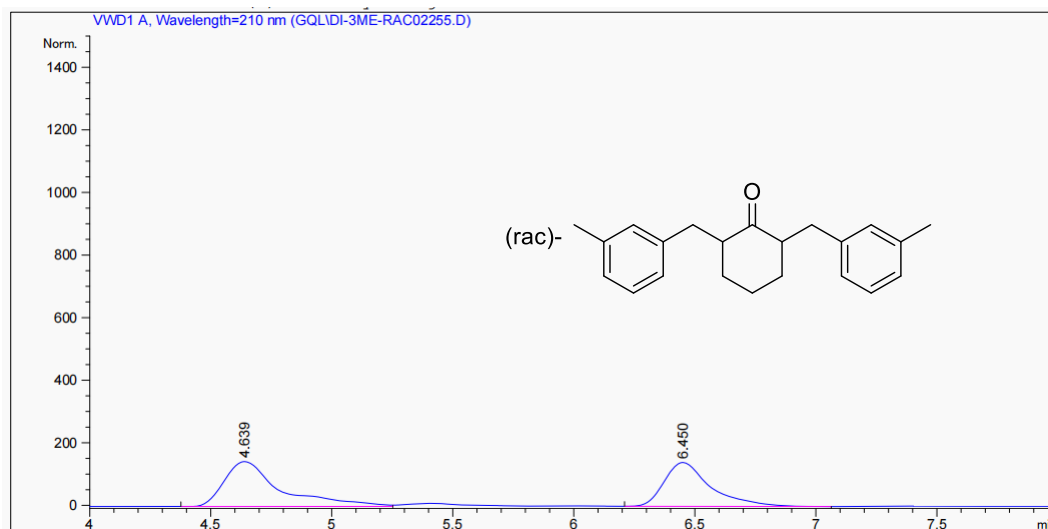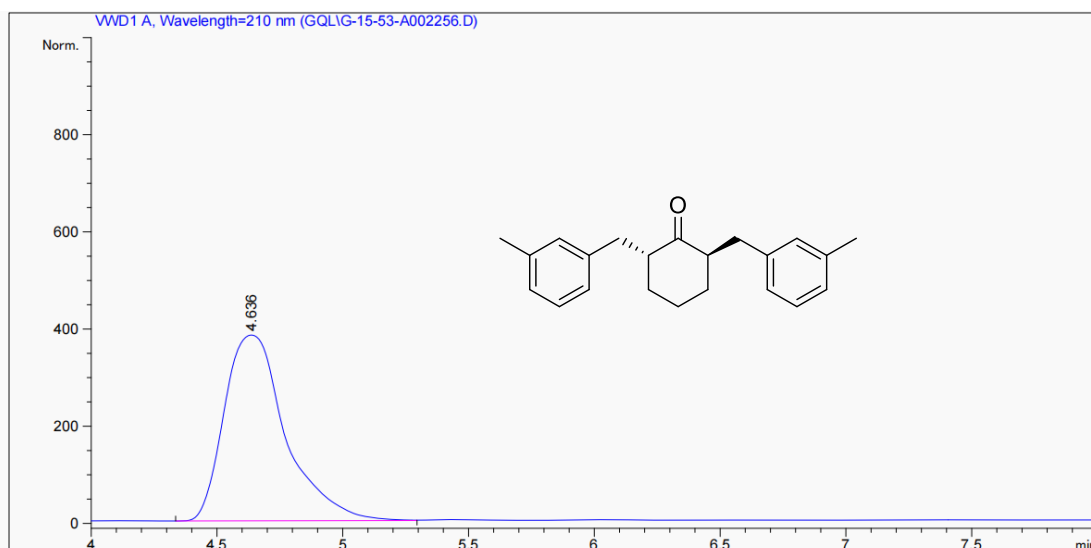

Signal 1: VWD1 A, Wavelength=210 nm

| Peak # | RetTime [min] | Type | Width [min] | Area [mAU*s] | Height [mAU] | Area %   |
|--------|---------------|------|-------------|--------------|--------------|----------|
| 1      | 4.636         | BV   | 0.2599      | 6487.35986   | 382.41516    | 100.0000 |

Totals : 6487.35986 382.41516

2,6-Bis(3-fluorobenzyl)cyclohexan-1-one (**4e**)

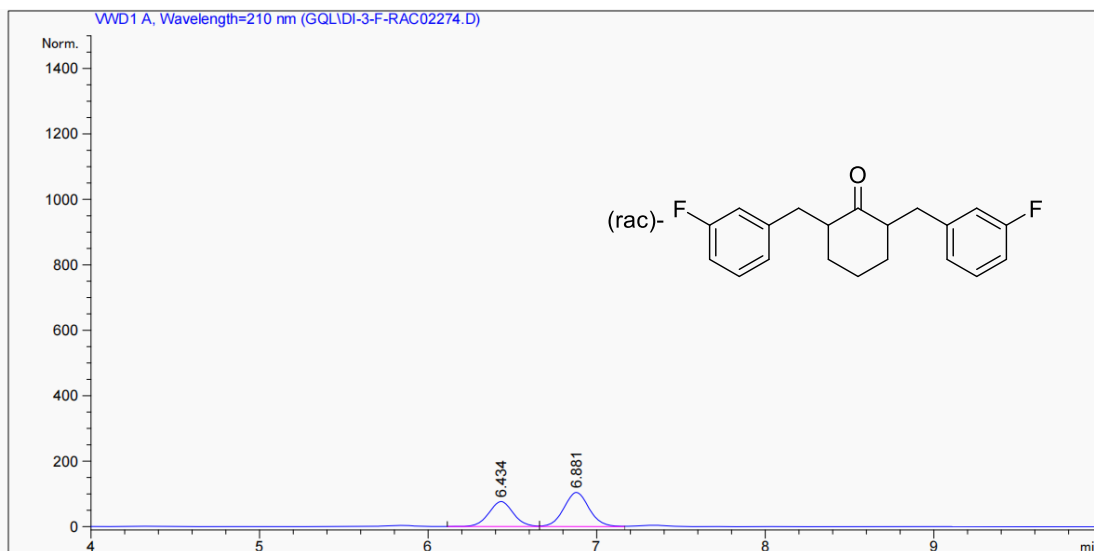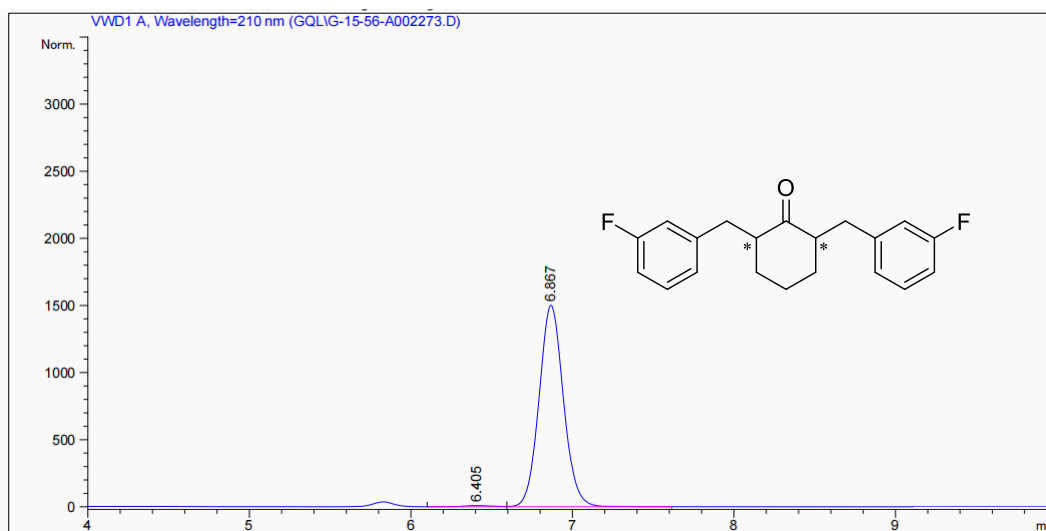

Signal 1: VWD1 A, Wavelength=210 nm

| Peak # | RetTime [min] | Type | Width [min] | Area [mAU*s] | Height [mAU] | Area %  |
|--------|---------------|------|-------------|--------------|--------------|---------|
| 1      | 6.405         | VV   | 0.1817      | 104.22371    | 8.34756      | 0.6574  |
| 2      | 6.867         | VB   | 0.1614      | 1.57496e4    | 1500.91772   | 99.3426 |

Totals : 1.58539e4 1509.26528

(+)-(2*R*,6*R*)-2,6-Bis(4-methylbenzyl)cyclohexan-1-one (**4f**)

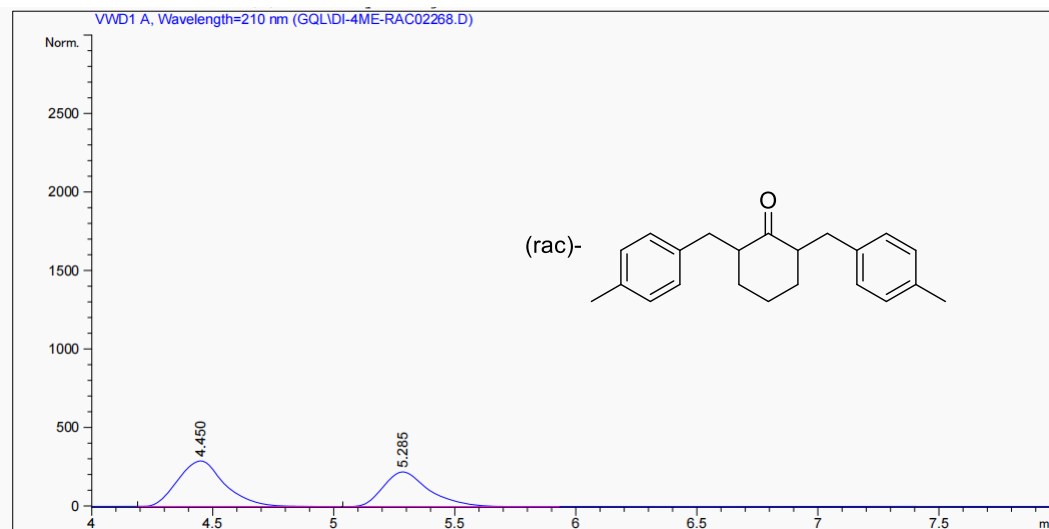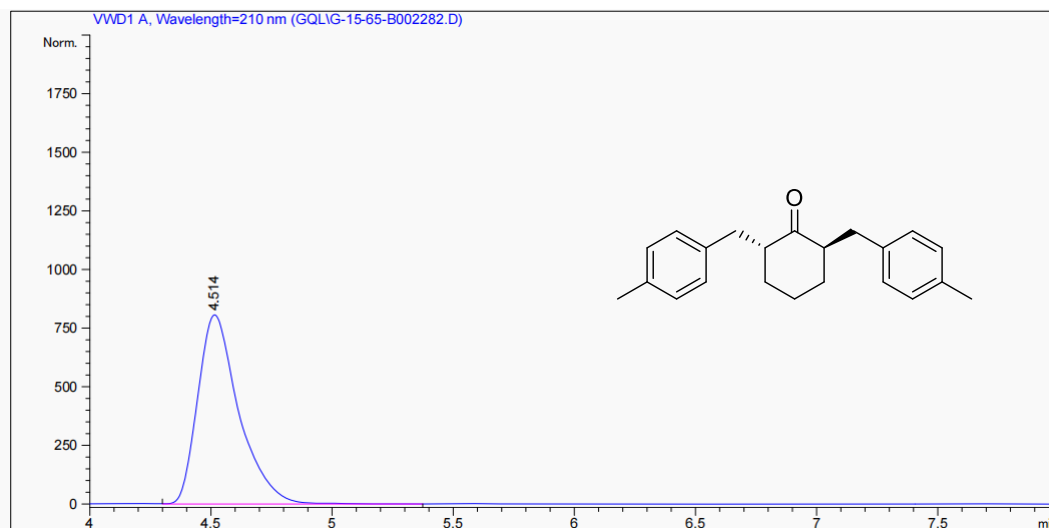

Signal 1: VWD1 A, Wavelength=210 nm

| Peak # | RetTime [min] | Type | Width [min] | Area [mAU*s] | Height [mAU] | Area %   |
|--------|---------------|------|-------------|--------------|--------------|----------|
| 1      | 4.514         | VV   | 0.1775      | 9503.42480   | 806.51422    | 100.0000 |

Totals : 9503.42480 806.51422

2,6-Bis(2-fluorobenzyl)cyclohexan-1-one (**4g**)

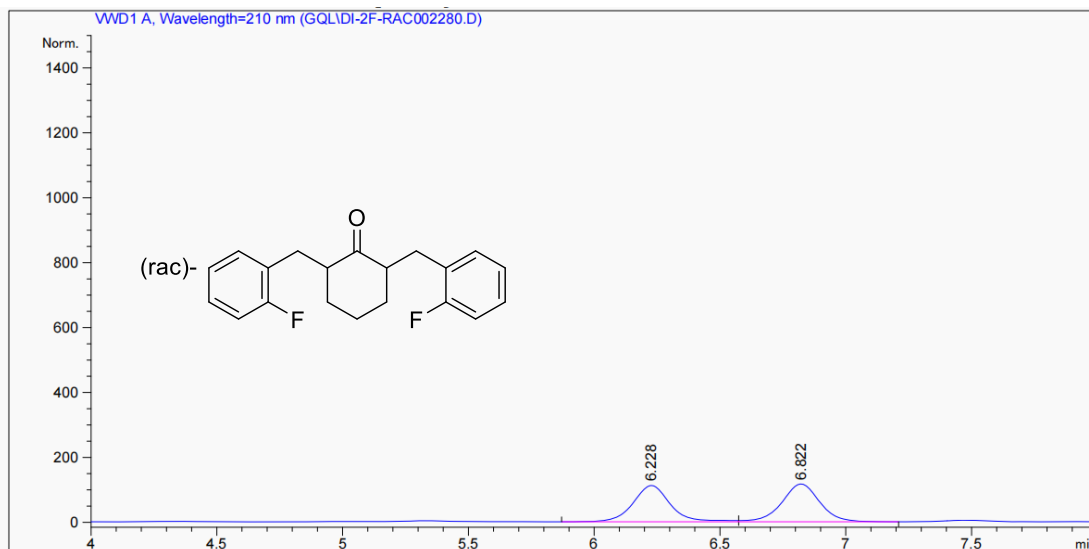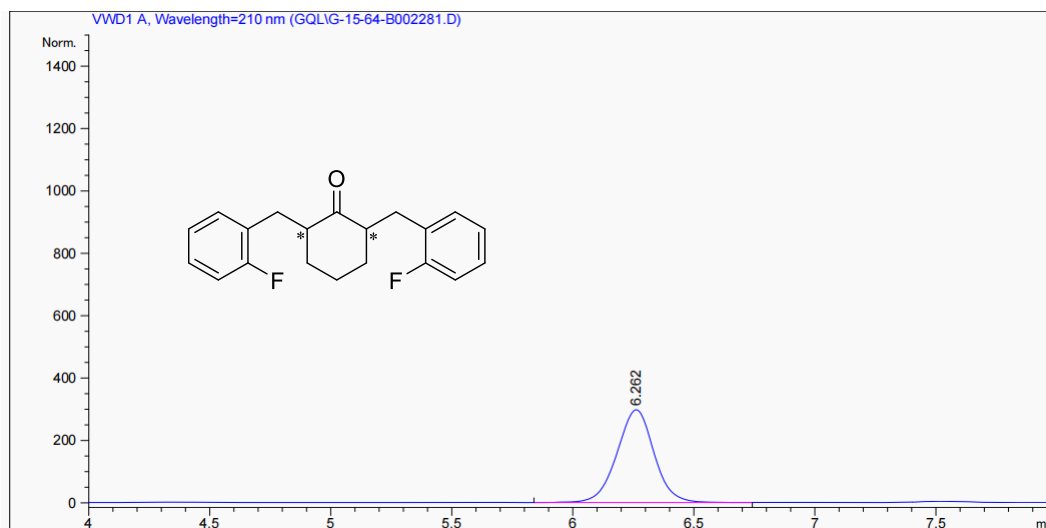

Signal 1: VWD1 A, Wavelength=210 nm

| Peak # | RetTime [min] | Type | Width [min] | Area [mAU*s] | Height [mAU] | Area %   |
|--------|---------------|------|-------------|--------------|--------------|----------|
| 1      | 6.262         | VB   | 0.1636      | 3174.77222   | 297.36655    | 100.0000 |

Totals : 3174.77222 297.36655



2,6-Bis(3,4-dichlorobenzyl)cyclohexan-1-one (**4h**)

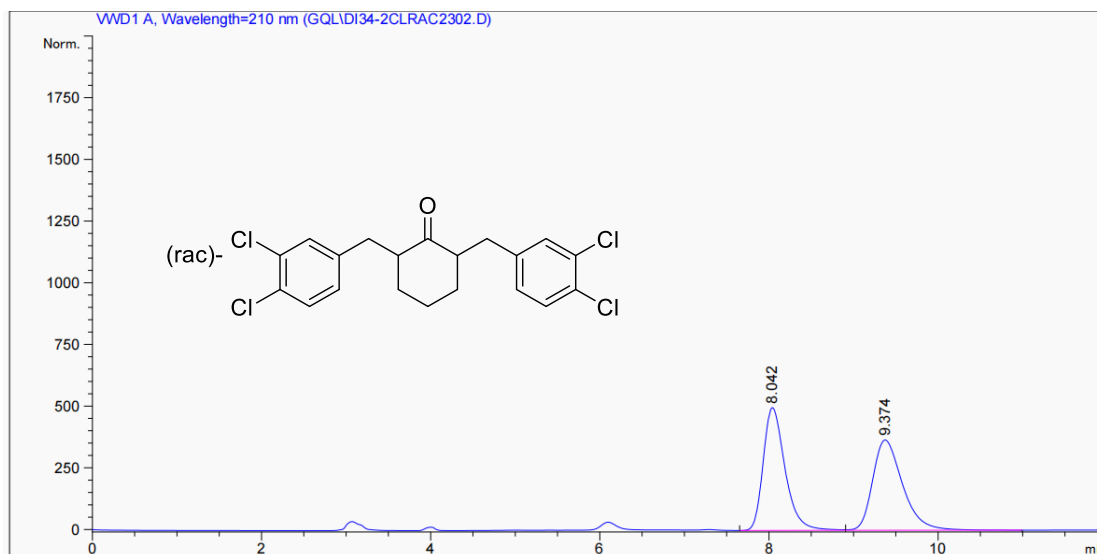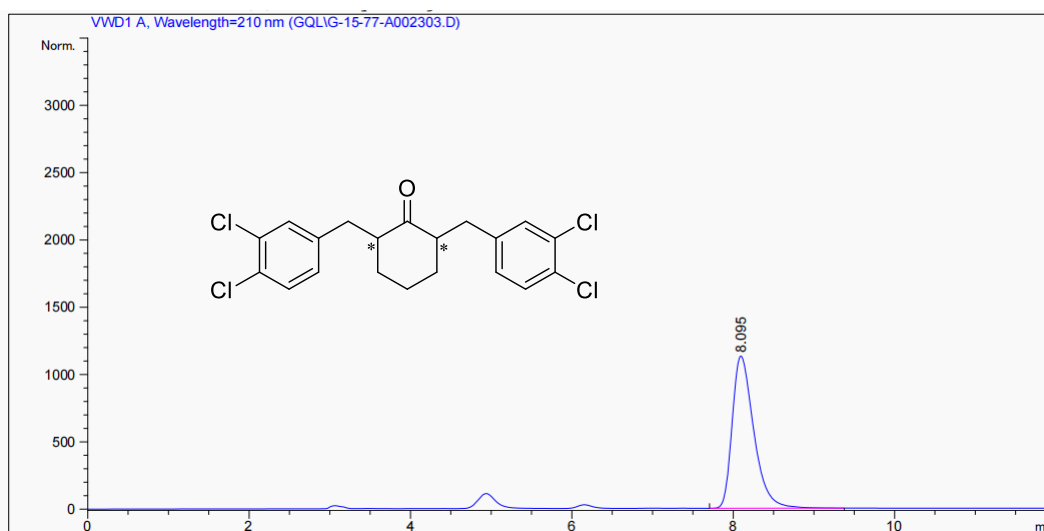

Signal 1: VWD1 A, Wavelength=210 nm

| Peak # | RetTime [min] | Type | Width [min] | Area [mAU*s] | Height [mAU] | Area %   |
|--------|---------------|------|-------------|--------------|--------------|----------|
| 1      | 8.095         | BB   | 0.2846      | 2.09887e4    | 1130.39001   | 100.0000 |

Totals : 2.09887e4 1130.39001

2,6-Bis(furan-2-ylmethyl)cyclohexan-1-one (**4i**)

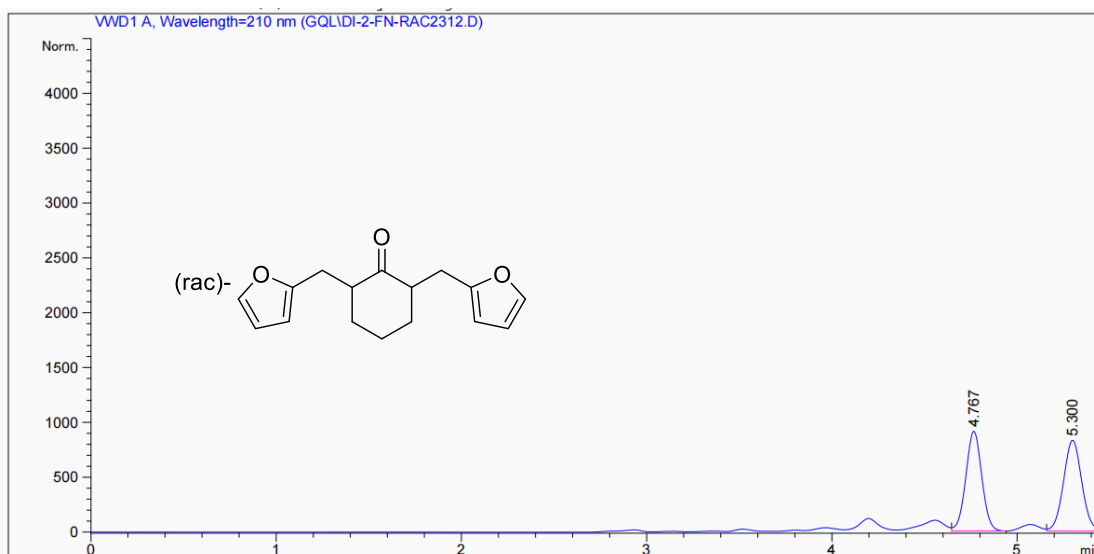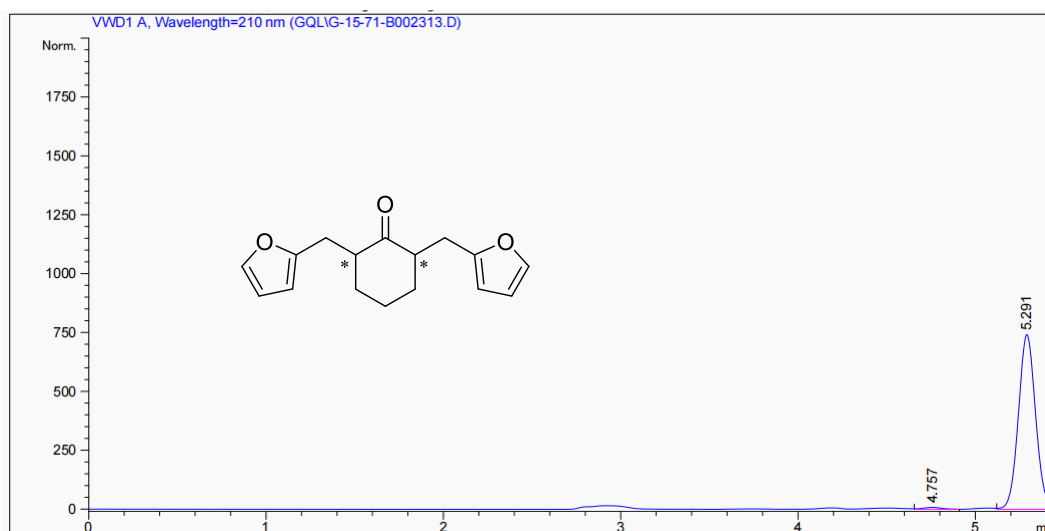

Signal 1: VWD1 A, Wavelength=210 nm

| Peak # | RetTime [min] | Type | Width [min] | Area [mAU*s] | Height [mAU] | Area %  |
|--------|---------------|------|-------------|--------------|--------------|---------|
| 1      | 4.757         | VB   | 0.1042      | 53.67749     | 7.90409      | 1.0594  |
| 2      | 5.291         | VV   | 0.1049      | 5013.00439   | 741.34015    | 98.9406 |

Totals : 5066.68189 749.24424

## Gram scale experiment

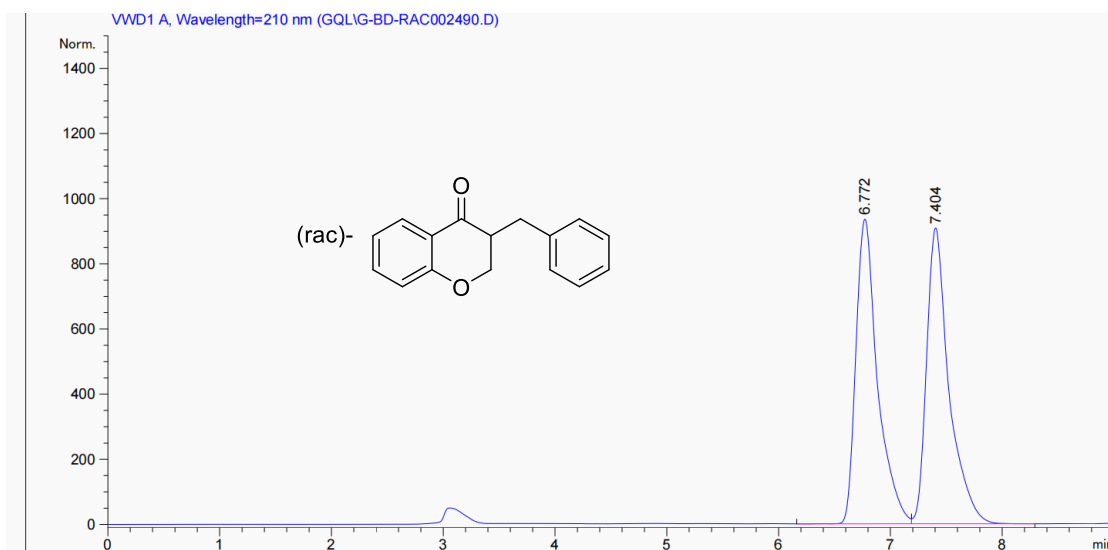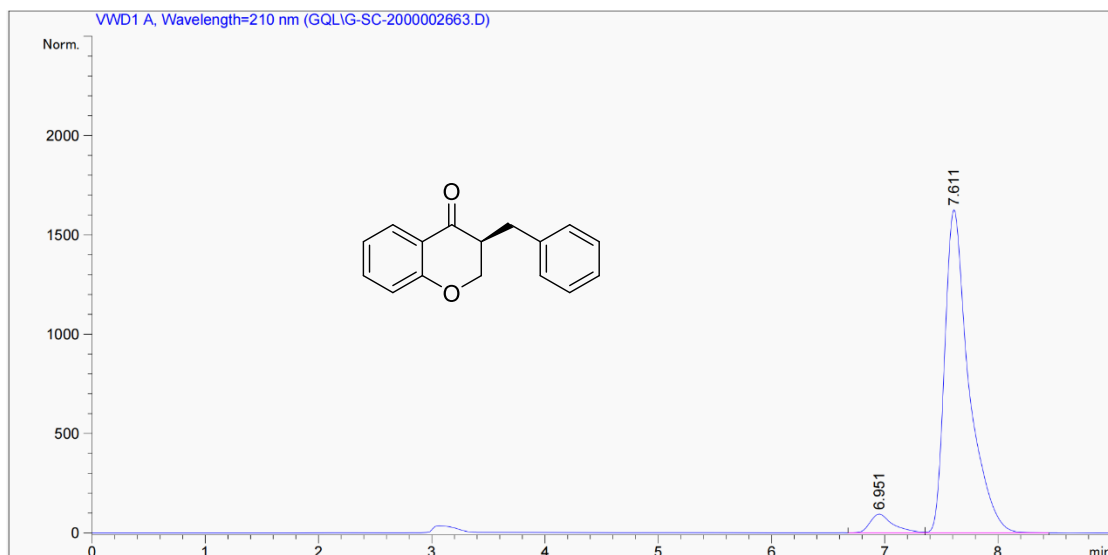

| Peak #   | RetTime [min] | Type | Width [min] | Area [mAU*s] | Height [mAU] | Area %  |
|----------|---------------|------|-------------|--------------|--------------|---------|
| 1        | 6.951         | BV   | 0.2051      | 1301.94519   | 93.71024     | 5.1502  |
| 2        | 7.611         | VB   | 0.2172      | 2.39775e4    | 1624.64355   | 94.8498 |
| Totals : |               |      |             | 2.52795e4    | 1718.35380   |         |

(3*S*,4*S*)-3-Benzylchroman-4-ol (**5**)

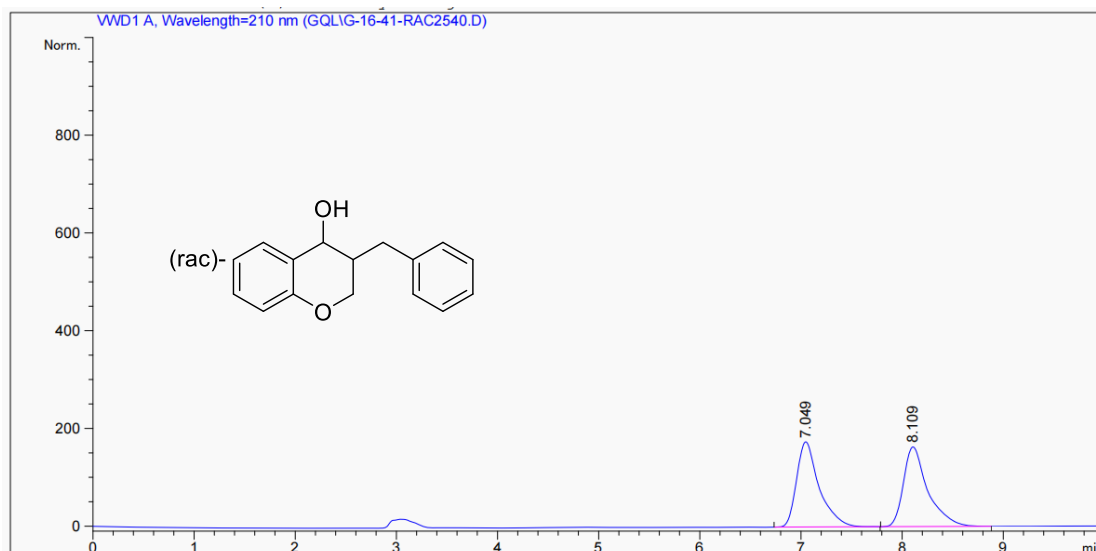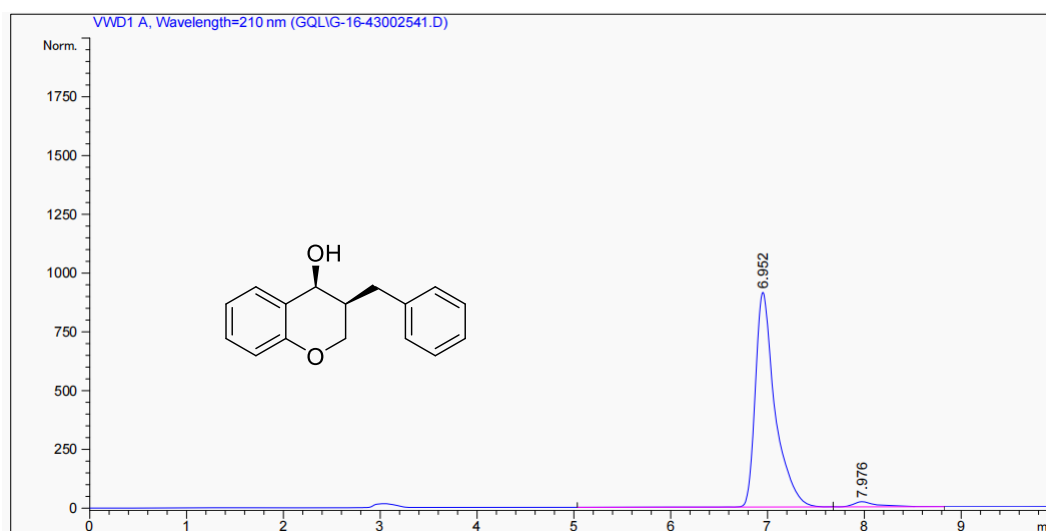

Signal 1: VWD1 A, Wavelength=210 nm

| Peak #   | RetTime [min] | Type | Width [min] | Area [mAU*s] | Height [mAU] | Area %  |
|----------|---------------|------|-------------|--------------|--------------|---------|
| 1        | 6.952         | BV   | 0.2068      | 1.28229e4    | 913.04211    | 97.0524 |
| 2        | 7.976         | VB   | 0.2526      | 389.45102    | 21.99629     | 2.9476  |
| Totals : |               |      |             | 1.32124e4    | 935.03840    |         |

(*R,E*)-3-benzylchroman-4-one oxime (**6**)

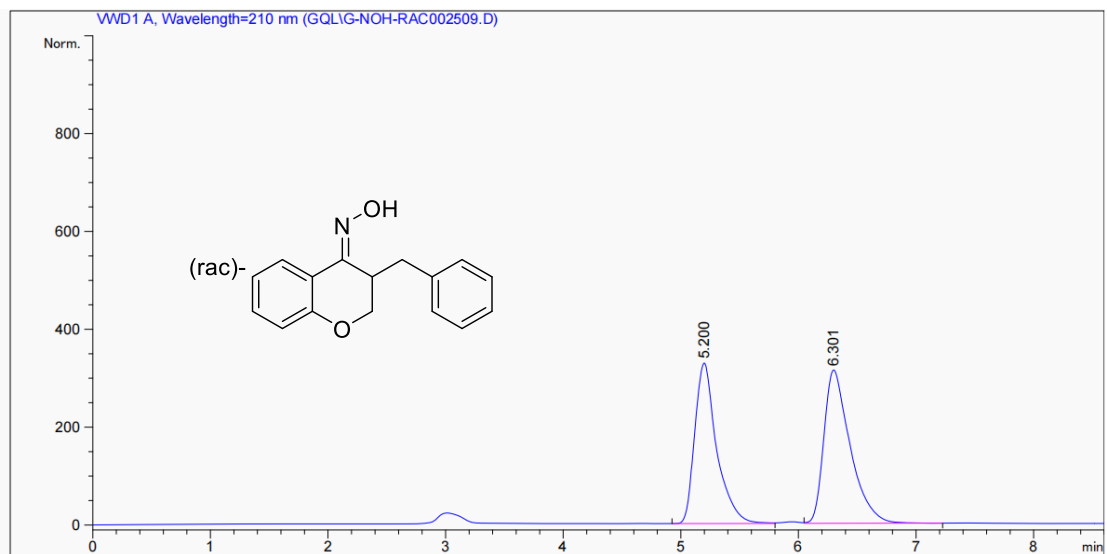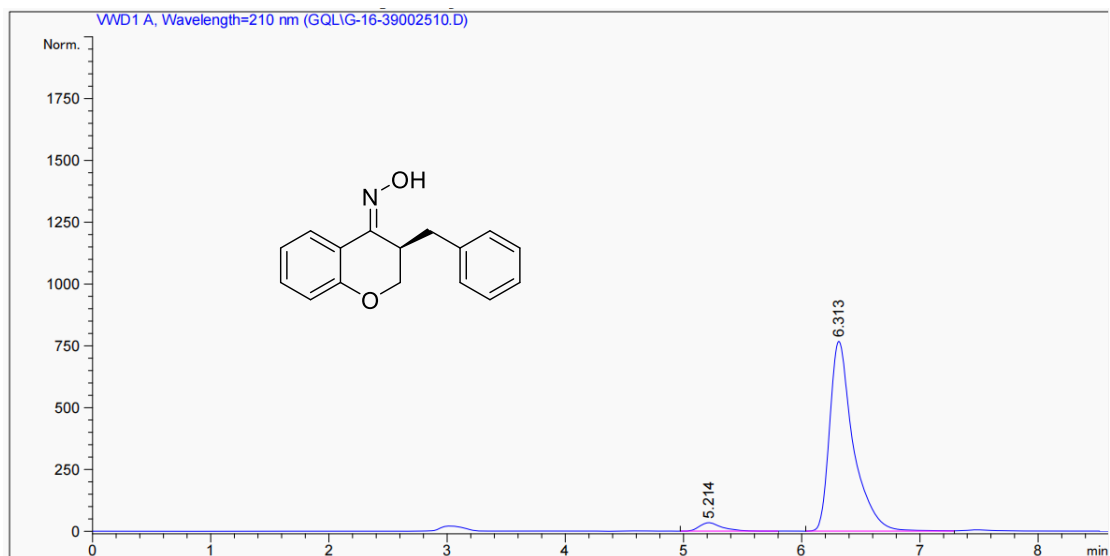

Signal 1: VWD1 A, Wavelength=210 nm

| Peak #   | RetTime [min] | Type | Width [min] | Area [mAU*s] | Height [mAU] | Area %  |
|----------|---------------|------|-------------|--------------|--------------|---------|
| 1        | 5.214         | BV   | 0.1986      | 453.10150    | 34.20211     | 4.0865  |
| 2        | 6.313         | VV   | 0.2036      | 1.06348e4    | 767.71741    | 95.9135 |
| Totals : |               |      |             | 1.10879e4    | 801.91952    |         |

## 8. X-ray crystallographic analysis of compound 2a.

The structure of **2a** was determined by the X-ray diffraction analysis of single crystal, which recrystallized from a mixed solution of dichloromethane and *n*-hexane.

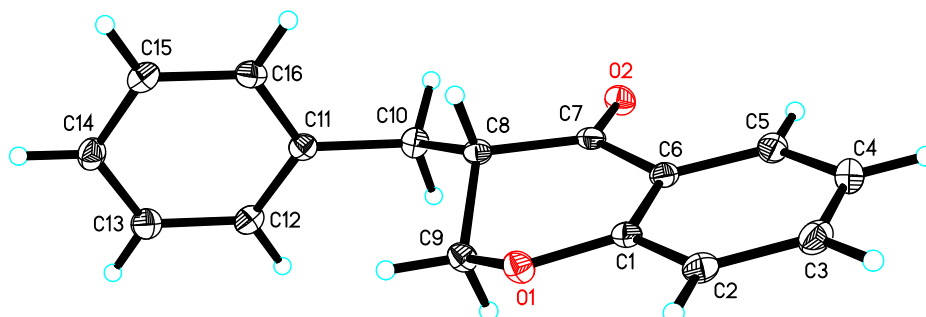

**Table S1. Crystal Data and Experimental Parameters for Compound 2a.**

| Compound                   | <b>2a</b>                                      |
|----------------------------|------------------------------------------------|
| Empirical formula          | C <sub>16</sub> H <sub>14</sub> O <sub>2</sub> |
| Formula weight             | 238.27                                         |
| Crystal system             | Monoclinic                                     |
| Space group                | P 1 2 1                                        |
| <i>a</i> (Å)               | 12.1858(3)                                     |
| <i>b</i> (Å)               | 5.49205(11)                                    |
| <i>c</i> (Å)               | 18.8339(4)                                     |
| <i>α</i> (deg)             | 90                                             |
| <i>β</i> (deg)             | 106.712(2)                                     |
| <i>γ</i> (deg)             | 90                                             |
| <i>V</i> (Å <sup>3</sup> ) | 1207.22(5)                                     |
| <i>Z</i>                   | 4                                              |
| <i>F</i> (000)             | 504                                            |
| size (mm)                  | 0.4 x 0.2 x 0.2                                |
| 2 $\theta$ range (deg)     | 3.787 to 75.898                                |
| Reflections collected      | 13010                                          |
| Reflections unique         | 4789                                           |

---

|                                     |                |
|-------------------------------------|----------------|
| abscorr ( $T_{\max}$ , $T_{\min}$ ) | 1.00, 0.91     |
| Data / restraints / parameters      | 4789 / 1 / 325 |
| $R$                                 | 0.0373         |
| $R_w$                               | 0.0987         |
| $R_{\text{all}}$                    | 0.0390         |
| Absolute structure parameter        | 0.11(9)        |
| CCDC                                | 2417594        |

---
